# Supplementary material for: MicroRNA-181a regulates IFN-γ expression in effector CD8+ T cell differentiation
Source: Springer Nature journal article supplement (doi:10.1007/s00109-019-01865-y), 2020-01-30
Supplement: MOESM1 [file 109_2019_1865_MOESM1_ESM.pdf]

## Supplementary Figures

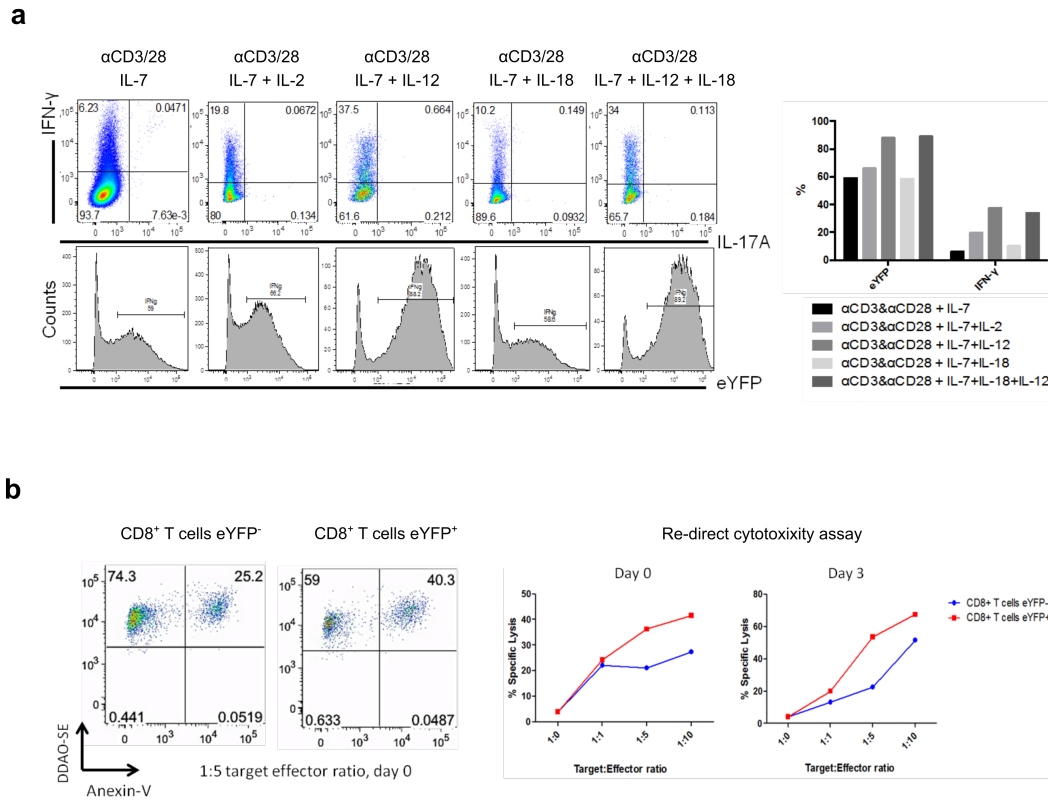

### Supplementary Figure 1. CD8 $^+$ T cell effector functions segregate with YFP $^+$ versus YFP $^-$ subsets of YETI reporter mice

(a) eYFP expression associates with intracellular expression of IFN- $\gamma$  in Yeti mice, upon IFN- $\gamma$  inducing conditions. Representative intracellular staining for IFN- $\gamma$  and IL-17A in thymic CD8 $^+$  T cells of *Ifng*-YFP mice stimulated *in vitro* for four days with plate bound anti-CD3 and anti-CD28 and in the presence of different cytokines (IL-7, IL-2, IL-4, IL-12 and IL-18) (left, top). Representative histograms indicating the eYFP expression in the same conditions (left, bottom). Frequency of IFN- $\gamma$  $^+$  and YFP $^+$  thymic CD8 $^+$  T cells (right). (b) Representative flow cytometry plots of Annexin-V staining at day 0 and with 1:5 target:effector ratio (left) and percentage of specific lysis (right) of the redirected lysis assay with (DDAO-SE-labelled) mastocytoma P815 target cell line by CD8 $^+$  eYFP $^+$  cells and CD8 $^+$  eYFP $^-$  at day 0 and day 3.

**a**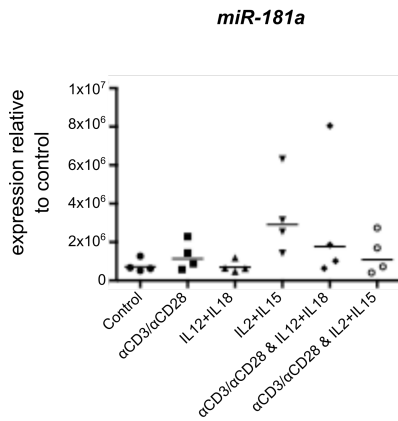**b**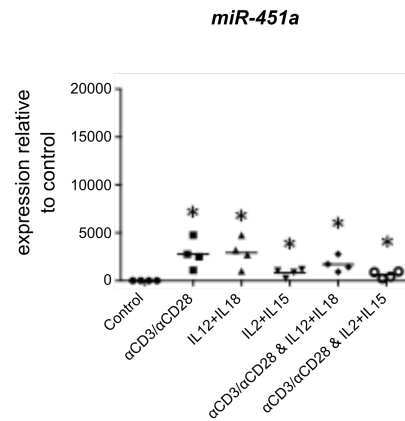

**Supplementary Figure 2. miR181a and miR451a are upregulated by signals that boost IFN- $\gamma$  responses.** RT-qPCR analysis of (a) miR-181a, (b) miR-451, expression in peripheral CD8<sup>+</sup> T cells under various IFN- $\gamma$  promoting culture conditions. Peripheral CD8<sup>+</sup> T cells were stimulated over night with IL-12 plus IL-18 or IL-2 plus IL-15 with or without TCR activation (plate bound anti-CD3 and anti-CD28). The conditions are indicated below each graph. Expression levels are relative to the reference miRNA miR-423-3p. (n=4). \*P  $\leq$  0.05.

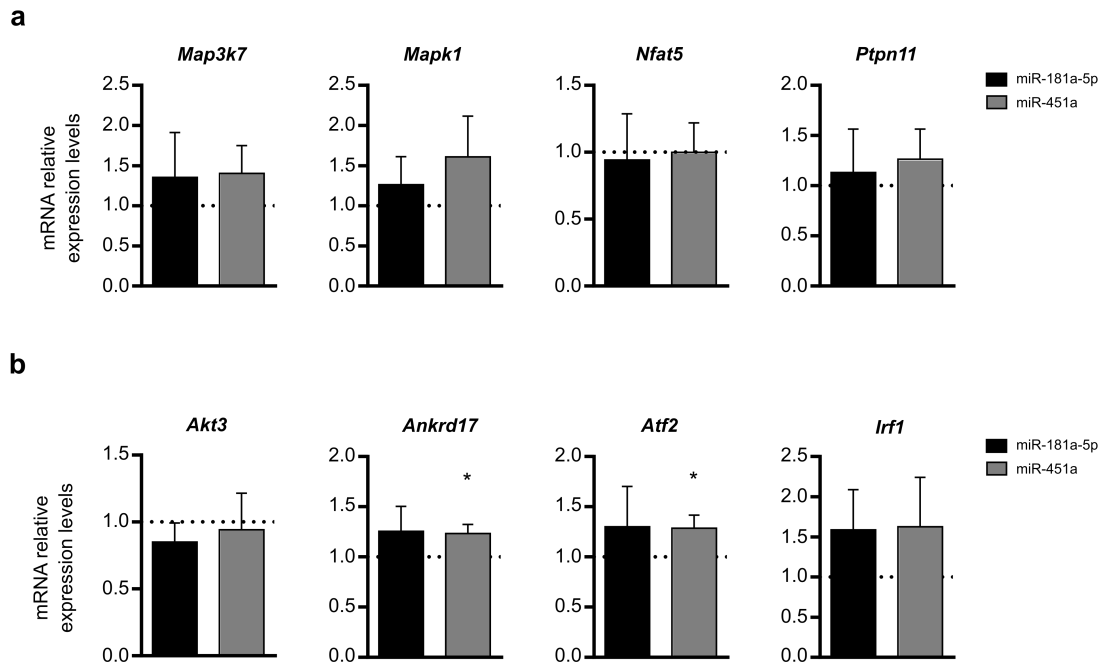

**Supplementary Figure 3. Putative mRNA targets not impacted by miR-181a or miR-451a mimics transfection into CD8 T cells.** RT-qPCR analysis of miR-181a-5p (a) or miR-451a (b) putative target genes upon transfection of cells with either miR181a-5p or miR-451a mimics (n=4). *Akt3* is predicted to be a target of both microRNAs. \*  $P \leq 0.05$

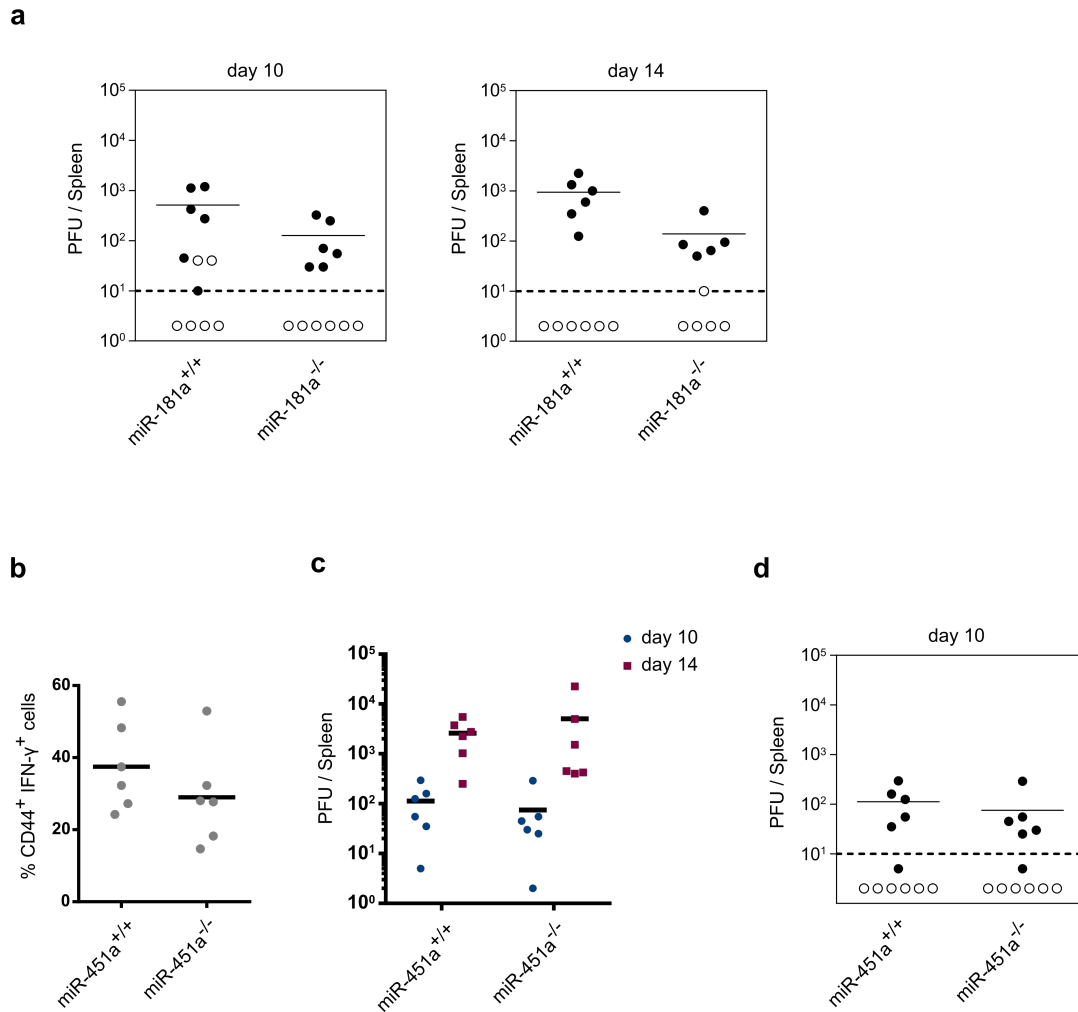

**Supplementary Figure 4. Lack of miR-451a, contrary to lack of miR-181-5p, has no effect on anti-viral CD8<sup>+</sup> T cell responses *in vivo***

(a) Viral titers in spleens of miR-181a<sup>-/-</sup> and miR-181a-5p<sup>+/+</sup> littermate mice infected with MuHV-4 of mice at 10 and 14 days post-infection. Black symbols, reactivating virus titers; open symbols, preformed infectious virus titers. Circles represent individual mice. Horizontal lines indicate the mean. The dashed line indicates the limit of detection.

(b-d) miR-451a<sup>-/-</sup> and miR-451a<sup>+/+</sup> littermate mice were infected intranasally with 10<sup>4</sup> PFU of MuHV-4. (b) Percentages of activated (CD44<sup>+</sup>) CD8<sup>+</sup> T cells expressing IFN- $\gamma$  as assessed by intracellular staining. (c) Viral loads (PFU) quantified by *ex vivo* reactivation assays in which latently infected splenocytes (harvested at 10 and 14 days post-infection) were co-cultured with permissive BHK-21 cells to allow quantification of the plate forming units (PFU) present. (d) Viral titers in spleens of miR-451a<sup>-/-</sup> and miR-451a<sup>+/+</sup> littermate mice infected with MuHV-4 of mice at 10 days post-infection. Black symbols, reactivating virus titers; open symbols, preformed infectious virus titers. Circles represent individual mice. Horizontal lines indicate the mean. The dashed line indicates the limit of detection.

**Supplementary Table 1.** Sequence of primers used in RT-qPCR analysis

| <b>Gene</b>                   | <b>Primer forward (5'-3')</b> | <b>Primer Reverse (5'-3')</b> |
|-------------------------------|-------------------------------|-------------------------------|
| <i>Actb</i>                   | CGTGAAAAGATGACCCAGATCA        | TGGTACGACCAGAGGCATACAG        |
| <i>Akt2</i>                   | ATACCAGGCACCCCTTCCT           | CACAAAGCATAGGCGGTCA           |
| <i>Akt3</i>                   | GTGGACCACTGTTATAGAGAGAACAT    | TTGGATAGCTTCCGTCCACT          |
| <i>Ankrd17</i>                | CTAAGCGTGGGCCAAAGA            | TGGATATCACAGTTGATGGAACA       |
| <i>Atf2</i>                   | GAAGAGTCTCGCCACAGTC           | TGGGTCTGAGGAGTTGTGTG          |
| <i>Eomes</i>                  | CGTTCACCCAGAATCTCCTAACA       | TGCAGCCTCGGTTGGTATTT          |
| <i>Id2</i>                    | CGCATCCCCTATCGTCAG            | AGCTCAGAAGGGAATTCAGATG        |
| <i>IFN<math>\gamma</math></i> | TCTTCTTGATATCTGGAGGAACTG      | GAGATAATCTGGCTCTGCAGGATT      |
| <i>Irf1</i>                   | CACTGATCTGTATAACCTACAGGTGTC   | CCTTCCTCATCCTCGTCTGT          |
| <i>Map2K1</i>                 | CCATTCCTCCTCCTGATGC           | GTCGGCTGTCCATTCCATA           |
| <i>Map3k7</i>                 | CCATCCAATGGCGTATC             | TGCCATGGATTCTTTGGAGT          |
| <i>Mapk1</i>                  | GACAGAGTACGTAGCCACACGTT       | AGCCACAGACCAAATATCAAT         |
| <i>Nfat5</i>                  | CTCGGACTTCATCTCATTGCT         | TCTGTGATGGGTGTAACCTCAGA       |
| <i>Ptpn11</i>                 | AGCTGGCTGAGACCACAGAT          | TGTTGCTGGAGCGTCTCA            |
| <i>Tbx21</i>                  | CACACACGTCTTTACTTTCCAAGAGA    | CACTCGTATCAACAGATGCGTACAT     |

**Supplementary Table 2.** miR-181a-5p and miR-451a validated and predicted targets

Note: Supplementary Table 2 is in a separate file as it has a large amount of information.
