# Supplementary material for: MicroRNA-181a regulates IFN-γ expression in effector CD8+ T cell differentiation
Source: J Mol Med (Berl). 2020 Jan 30;98(2):309–20. doi: 10.1007/s00109-019-01865-y (PMC7007887; doi:10.1007/s00109-019-01865-y)
Supplement: Supplementary file 2 — (XLSX 189 kb). [file 109_2019_1865_MOESM2_ESM.xlsx]

## Sheet: Validated targets
miRNA	MIMATid	Gene	EntrezID	PMID
mmu-miR-181a-5p	MIMAT0000210	3110001I22Rik	66598	19536157
mmu-miR-181a-5p	MIMAT0000210	4930563E22Rik	75304	21258322
mmu-miR-181a-5p	MIMAT0000210	4933411K20Rik	66756	19536157
mmu-miR-181a-5p	MIMAT0000210	4933426M11Rik	217684	19536157
mmu-miR-181a-5p	MIMAT0000210	4933434E20Rik	99650	19536157
mmu-miR-181a-5p	MIMAT0000210	Ablim2	231148	19536157
mmu-miR-181a-5p	MIMAT0000210	Acsl4	50790	19536157
mmu-miR-181a-5p	MIMAT0000210	Acss1	68738	19536157
mmu-miR-181a-5p	MIMAT0000210	Acvr1b	11479	19536157
mmu-miR-181a-5p	MIMAT0000210	Acvr2a	11480	19536157
mmu-miR-181a-5p	MIMAT0000210	Acvr2a	11480	23527246
mmu-miR-181a-5p	MIMAT0000210	Adam11	11488	19536157
mmu-miR-181a-5p	MIMAT0000210	Adam22	11496	19536157
mmu-miR-181a-5p	MIMAT0000210	Adam9	11502	19536157
mmu-miR-181a-5p	MIMAT0000210	Adamts5	23794	19536157
mmu-miR-181a-5p	MIMAT0000210	Adamts9	101401	21258322
mmu-miR-181a-5p	MIMAT0000210	Adamts9	101401	23597149
mmu-miR-181a-5p	MIMAT0000210	Adcy1	432530	19536157
mmu-miR-181a-5p	MIMAT0000210	Adhfe1	76187	19536157
mmu-miR-181a-5p	MIMAT0000210	Afap1	70292	19536157
mmu-miR-181a-5p	MIMAT0000210	Aff4	93736	19536157
mmu-miR-181a-5p	MIMAT0000210	Agfg1	15463	19536157
mmu-miR-181a-5p	MIMAT0000210	Aggf1	66549	19536157
mmu-miR-181a-5p	MIMAT0000210	Agps	228061	19536157
mmu-miR-181a-5p	MIMAT0000210	Ahi1	52906	19536157
mmu-miR-181a-5p	MIMAT0000210	AI597479	98404	19536157
mmu-miR-181a-5p	MIMAT0000210	AK010878	100233175	19536157
mmu-miR-181a-5p	MIMAT0000210	Akap17b	338351	19536157
mmu-miR-181a-5p	MIMAT0000210	Aldh3a2	11671	19536157
mmu-miR-181a-5p	MIMAT0000210	Amer1	72345	19536157
mmu-miR-181a-5p	MIMAT0000210	Ammecr1	56068	19536157
mmu-miR-181a-5p	MIMAT0000210	Amot	27494	19536157
mmu-miR-181a-5p	MIMAT0000210	Angptl2	26360	19536157
mmu-miR-181a-5p	MIMAT0000210	Ank1	11733	19536157
mmu-miR-181a-5p	MIMAT0000210	Ank3	11735	19536157
mmu-miR-181a-5p	MIMAT0000210	Antxr1	69538	19536157
mmu-miR-181a-5p	MIMAT0000210	Ap1g1	11765	25083871
mmu-miR-181a-5p	MIMAT0000210	Apba1	319924	19536157
mmu-miR-181a-5p	MIMAT0000210	Apba2	11784	19536157
mmu-miR-181a-5p	MIMAT0000210	Aplp2	11804	19536157
mmu-miR-181a-5p	MIMAT0000210	Aqp3	11828	21258322
mmu-miR-181a-5p	MIMAT0000210	Aqp3	11828	23597149
mmu-miR-181a-5p	MIMAT0000210	Aqp4	11829	19536157
mmu-miR-181a-5p	MIMAT0000210	Arf2	11841	19536157
mmu-miR-181a-5p	MIMAT0000210	Arhgap20	244867	19536157
mmu-miR-181a-5p	MIMAT0000210	Arhgap31	12549	19536157
mmu-miR-181a-5p	MIMAT0000210	Arhgef15	442801	21258322
mmu-miR-181a-5p	MIMAT0000210	Arhgef15	442801	25083871
mmu-miR-181a-5p	MIMAT0000210	Arhgef15	442801	23597149
mmu-miR-181a-5p	MIMAT0000210	Arhgef15	442801	19536157
mmu-miR-181a-5p	MIMAT0000210	Arhgef17	207212	19536157
mmu-miR-181a-5p	MIMAT0000210	Arl8b	67166	19536157
mmu-miR-181a-5p	MIMAT0000210	Arrdc3	105171	19536157
mmu-miR-181a-5p	MIMAT0000210	Arrdc4	66412	19536157
mmu-miR-181a-5p	MIMAT0000210	Astn1	11899	19536157
mmu-miR-181a-5p	MIMAT0000210	Atl1	73991	19536157
mmu-miR-181a-5p	MIMAT0000210	Atp2a2	11938	25083871
mmu-miR-181a-5p	MIMAT0000210	Atp2b2	11941	19536157
mmu-miR-181a-5p	MIMAT0000210	Atp6v1a	11964	19536157
mmu-miR-181a-5p	MIMAT0000210	Atp9b	50771	19536157
mmu-miR-181a-5p	MIMAT0000210	Atpaf1	230649	19536157
mmu-miR-181a-5p	MIMAT0000210	Azin1	54375	19536157
mmu-miR-181a-5p	MIMAT0000210	B4galt4	56375	19536157
mmu-miR-181a-5p	MIMAT0000210	Bach1	12013	19536157
mmu-miR-181a-5p	MIMAT0000210	Bai3	210933	19536157
mmu-miR-181a-5p	MIMAT0000210	Bcl2	12043	19536157
mmu-miR-181a-5p	MIMAT0000210	Bcl2	12043	17344418
mmu-miR-181a-5p	MIMAT0000210	Bend6	320705	19536157
mmu-miR-181a-5p	MIMAT0000210	Bhlhe40	20893	19536157
mmu-miR-181a-5p	MIMAT0000210	Bicd1	12121	19536157
mmu-miR-181a-5p	MIMAT0000210	Blcap	53619	19536157
mmu-miR-181a-5p	MIMAT0000210	Bnc2	242509	25083871
mmu-miR-181a-5p	MIMAT0000210	Bptf	207165	19536157
mmu-miR-181a-5p	MIMAT0000210	Btaf1	107182	19536157
mmu-miR-181a-5p	MIMAT0000210	Btbd3	228662	19536157
mmu-miR-181a-5p	MIMAT0000210	Cab39	12283	19536157
mmu-miR-181a-5p	MIMAT0000210	Cacna1e	12290	19536157
mmu-miR-181a-5p	MIMAT0000210	Cadm1	54725	19536157
mmu-miR-181a-5p	MIMAT0000210	Cadm2	239857	19536157
mmu-miR-181a-5p	MIMAT0000210	Cald1	109624	19536157
mmu-miR-181a-5p	MIMAT0000210	Camta1	100072	19536157
mmu-miR-181a-5p	MIMAT0000210	Car2	12349	19536157
mmu-miR-181a-5p	MIMAT0000210	Cbx7	52609	22226354
mmu-miR-181a-5p	MIMAT0000210	Ccnj	240665	19536157
mmu-miR-181a-5p	MIMAT0000210	Cd69	12515	17344418
mmu-miR-181a-5p	MIMAT0000210	Cdan1	68968	19536157
mmu-miR-181a-5p	MIMAT0000210	Cds2	110911	19536157
mmu-miR-181a-5p	MIMAT0000210	Celf1	13046	19536157
mmu-miR-181a-5p	MIMAT0000210	Celf2	14007	19536157
mmu-miR-181a-5p	MIMAT0000210	Celf5	319586	19536157
mmu-miR-181a-5p	MIMAT0000210	Cenpb	12616	19536157
mmu-miR-181a-5p	MIMAT0000210	Chd9	109151	19536157
mmu-miR-181a-5p	MIMAT0000210	Clmn	94040	21258322
mmu-miR-181a-5p	MIMAT0000210	Col4a1	12826	19536157
mmu-miR-181a-5p	MIMAT0000210	Cpeb4	67579	19536157
mmu-miR-181a-5p	MIMAT0000210	Creb1	12912	19536157
mmu-miR-181a-5p	MIMAT0000210	Crebzf	233490	19536157
mmu-miR-181a-5p	MIMAT0000210	Crk	12928	19536157
mmu-miR-181a-5p	MIMAT0000210	Crtc1	382056	19536157
mmu-miR-181a-5p	MIMAT0000210	Csnk1g1	214897	19536157
mmu-miR-181a-5p	MIMAT0000210	Ctbp1	13016	19536157
mmu-miR-181a-5p	MIMAT0000210	Ctdsp1	227292	19536157
mmu-miR-181a-5p	MIMAT0000210	Ctsb	13030	19536157
mmu-miR-181a-5p	MIMAT0000210	D4Wsu53e	27981	19536157
mmu-miR-181a-5p	MIMAT0000210	D630045J12Rik	330286	19536157
mmu-miR-181a-5p	MIMAT0000210	Dagla	269060	21258322
mmu-miR-181a-5p	MIMAT0000210	Dcaf5	320808	19536157
mmu-miR-181a-5p	MIMAT0000210	Dclk1	13175	19536157
mmu-miR-181a-5p	MIMAT0000210	Dctn4	67665	19536157
mmu-miR-181a-5p	MIMAT0000210	Dcx	13193	19536157
mmu-miR-181a-5p	MIMAT0000210	Ddit4	74747	19536157
mmu-miR-181a-5p	MIMAT0000210	Dicer1	192119	19536157
mmu-miR-181a-5p	MIMAT0000210	Dip2c	208440	19536157
mmu-miR-181a-5p	MIMAT0000210	Dlgap2	244310	19536157
mmu-miR-181a-5p	MIMAT0000210	Dnah5	110082	19536157
mmu-miR-181a-5p	MIMAT0000210	Dnaja4	58233	19536157
mmu-miR-181a-5p	MIMAT0000210	Dnajc27	217378	19536157
mmu-miR-181a-5p	MIMAT0000210	Dync1li2	234663	19536157
mmu-miR-181a-5p	MIMAT0000210	E2f3	13557	19536157
mmu-miR-181a-5p	MIMAT0000210	Ebf3	13593	23142080
mmu-miR-181a-5p	MIMAT0000210	Ednrb	13618	19536157
mmu-miR-181a-5p	MIMAT0000210	Egr1	13653	17344418
mmu-miR-181a-5p	MIMAT0000210	Eif2ak2	19106	19536157
mmu-miR-181a-5p	MIMAT0000210	Elavl4	15572	19536157
mmu-miR-181a-5p	MIMAT0000210	Elf2	69257	19536157
mmu-miR-181a-5p	MIMAT0000210	Elovl2	54326	19536157
mmu-miR-181a-5p	MIMAT0000210	Elovl5	68801	19536157
mmu-miR-181a-5p	MIMAT0000210	Eme2	193838	19536157
mmu-miR-181a-5p	MIMAT0000210	Eml6	237711	19536157
mmu-miR-181a-5p	MIMAT0000210	Enpp4	224794	19536157
mmu-miR-181a-5p	MIMAT0000210	Entpd6	12497	19536157
mmu-miR-181a-5p	MIMAT0000210	Epc1	13831	19536157
mmu-miR-181a-5p	MIMAT0000210	Epc2	227867	19536157
mmu-miR-181a-5p	MIMAT0000210	Epha4	13838	19536157
mmu-miR-181a-5p	MIMAT0000210	Erg	13876	19536157
mmu-miR-181a-5p	MIMAT0000210	Ermp1	226090	19536157
mmu-miR-181a-5p	MIMAT0000210	Esyt2	52635	19536157
mmu-miR-181a-5p	MIMAT0000210	Eya3	14050	19536157
mmu-miR-181a-5p	MIMAT0000210	Fads1	76267	19536157
mmu-miR-181a-5p	MIMAT0000210	Faim2	72393	19536157
mmu-miR-181a-5p	MIMAT0000210	Fam115a	77574	19536157
mmu-miR-181a-5p	MIMAT0000210	Fam122b	78755	25083871
mmu-miR-181a-5p	MIMAT0000210	Fam160a1	229488	19536157
mmu-miR-181a-5p	MIMAT0000210	Fam160b2	239170	25083871
mmu-miR-181a-5p	MIMAT0000210	Fam160b2	239170	23142080
mmu-miR-181a-5p	MIMAT0000210	Fam160b2	239170	21258322
mmu-miR-181a-5p	MIMAT0000210	Fam160b2	239170	23597149
mmu-miR-181a-5p	MIMAT0000210	Fam160b2	239170	19536157
mmu-miR-181a-5p	MIMAT0000210	Fam168a	319604	19536157
mmu-miR-181a-5p	MIMAT0000210	Fam171a1	269233	19536157
mmu-miR-181a-5p	MIMAT0000210	Fam69c	240479	25083871
mmu-miR-181a-5p	MIMAT0000210	Fbxl20	72194	19536157
mmu-miR-181a-5p	MIMAT0000210	Fbxl3	50789	19536157
mmu-miR-181a-5p	MIMAT0000210	Fbxo11	225055	19536157
mmu-miR-181a-5p	MIMAT0000210	Fbxw11	103583	19536157
mmu-miR-181a-5p	MIMAT0000210	Fcho2	218503	19536157
mmu-miR-181a-5p	MIMAT0000210	Fign	60344	19536157
mmu-miR-181a-5p	MIMAT0000210	Fkbp1a	14225	19536157
mmu-miR-181a-5p	MIMAT0000210	Flnb	286940	19536157
mmu-miR-181a-5p	MIMAT0000210	Flt1	14254	19536157
mmu-miR-181a-5p	MIMAT0000210	Fndc3b	72007	19536157
mmu-miR-181a-5p	MIMAT0000210	Fndc9	320116	19536157
mmu-miR-181a-5p	MIMAT0000210	Foxk1	17425	19536157
mmu-miR-181a-5p	MIMAT0000210	Foxp1	108655	19536157
mmu-miR-181a-5p	MIMAT0000210	Gabra1	14394	19536157
mmu-miR-181a-5p	MIMAT0000210	Gabra4	14397	19536157
mmu-miR-181a-5p	MIMAT0000210	Gata6	14465	23262291
mmu-miR-181a-5p	MIMAT0000210	Gca	227960	19536157
mmu-miR-181a-5p	MIMAT0000210	Gigyf2	227331	19536157
mmu-miR-181a-5p	MIMAT0000210	Gja1	14609	19536157
mmu-miR-181a-5p	MIMAT0000210	Glcci1	170772	19536157
mmu-miR-181a-5p	MIMAT0000210	Gls	14660	19536157
mmu-miR-181a-5p	MIMAT0000210	Gnao1	14681	19536157
mmu-miR-181a-5p	MIMAT0000210	Gnaq	14682	19536157
mmu-miR-181a-5p	MIMAT0000210	Golga1	76899	19536157
mmu-miR-181a-5p	MIMAT0000210	Gosr1	53334	19536157
mmu-miR-181a-5p	MIMAT0000210	Gpd1l	333433	21258322
mmu-miR-181a-5p	MIMAT0000210	Gpm6a	234267	19536157
mmu-miR-181a-5p	MIMAT0000210	Gpm6b	14758	19536157
mmu-miR-181a-5p	MIMAT0000210	Gpr146	80290	19536157
mmu-miR-181a-5p	MIMAT0000210	Gpr17	574402	19536157
mmu-miR-181a-5p	MIMAT0000210	Gprin3	243385	19536157
mmu-miR-181a-5p	MIMAT0000210	Gria3	53623	19536157
mmu-miR-181a-5p	MIMAT0000210	Grin3a	242443	19536157
mmu-miR-181a-5p	MIMAT0000210	Grm5	108071	19536157
mmu-miR-181a-5p	MIMAT0000210	H2-D1	14964	21258322
mmu-miR-181a-5p	MIMAT0000210	Hlf	217082	19536157
mmu-miR-181a-5p	MIMAT0000210	Hmgxb4	70823	19536157
mmu-miR-181a-5p	MIMAT0000210	Hook3	320191	19536157
mmu-miR-181a-5p	MIMAT0000210	Hoxa11	15396	16489342
mmu-miR-181a-5p	MIMAT0000210	Iba57	216792	19536157
mmu-miR-181a-5p	MIMAT0000210	Id2	15902	19536157
mmu-miR-181a-5p	MIMAT0000210	Ids	15931	19536157
mmu-miR-181a-5p	MIMAT0000210	Ikzf2	22779	21258322
mmu-miR-181a-5p	MIMAT0000210	Ikzf2	22779	25083871
mmu-miR-181a-5p	MIMAT0000210	Il1a	16175	23516523
mmu-miR-181a-5p	MIMAT0000210	Inpp5a	212111	19536157
mmu-miR-181a-5p	MIMAT0000210	Inpp5e	64436	19536157
mmu-miR-181a-5p	MIMAT0000210	Intu	380614	19536157
mmu-miR-181a-5p	MIMAT0000210	Invs	16348	19536157
mmu-miR-181a-5p	MIMAT0000210	Itga4	16401	19536157
mmu-miR-181a-5p	MIMAT0000210	Itpk1	217837	21258322
mmu-miR-181a-5p	MIMAT0000210	Jag1	16449	19536157
mmu-miR-181a-5p	MIMAT0000210	Katnbl1	72425	19536157
mmu-miR-181a-5p	MIMAT0000210	Kbtbd11	74901	19536157
mmu-miR-181a-5p	MIMAT0000210	Kcna2	16490	19536157
mmu-miR-181a-5p	MIMAT0000210	Kcnj10	16513	19536157
mmu-miR-181a-5p	MIMAT0000210	Kcnk10	72258	19536157
mmu-miR-181a-5p	MIMAT0000210	Kcns2	16539	19536157
mmu-miR-181a-5p	MIMAT0000210	Khnyn	219094	19536157
mmu-miR-181a-5p	MIMAT0000210	Kif1c	16562	19536157
mmu-miR-181a-5p	MIMAT0000210	Kif5c	16574	19536157
mmu-miR-181a-5p	MIMAT0000210	Kifc2	16581	19536157
mmu-miR-181a-5p	MIMAT0000210	Klf2	16598	19536157
mmu-miR-181a-5p	MIMAT0000210	Klf3	16599	19536157
mmu-miR-181a-5p	MIMAT0000210	Kmt2a	214162	19536157
mmu-miR-181a-5p	MIMAT0000210	Kmt2c	231051	19536157
mmu-miR-181a-5p	MIMAT0000210	Ksr1	16706	19536157
mmu-miR-181a-5p	MIMAT0000210	L1cam	16728	19536157
mmu-miR-181a-5p	MIMAT0000210	Lamp5	76161	19536157
mmu-miR-181a-5p	MIMAT0000210	Lasp1	16796	19536157
mmu-miR-181a-5p	MIMAT0000210	Lemd3	380664	19536157
mmu-miR-181a-5p	MIMAT0000210	Lgi2	246316	19536157
mmu-miR-181a-5p	MIMAT0000210	Lmo3	109593	19536157
mmu-miR-181a-5p	MIMAT0000210	Lnp	69605	23142080
mmu-miR-181a-5p	MIMAT0000210	Lnp	69605	25083871
mmu-miR-181a-5p	MIMAT0000210	Lpgat1	226856	19536157
mmu-miR-181a-5p	MIMAT0000210	Lpp	210126	19536157
mmu-miR-181a-5p	MIMAT0000210	Lrig2	269473	19536157
mmu-miR-181a-5p	MIMAT0000210	Lrp11	237253	19536157
mmu-miR-181a-5p	MIMAT0000210	Lrp8	16975	19536157
mmu-miR-181a-5p	MIMAT0000210	Lrrn3	16981	19536157
mmu-miR-181a-5p	MIMAT0000210	Luzp2	233271	19536157
mmu-miR-181a-5p	MIMAT0000210	Lzts3	241638	19536157
mmu-miR-181a-5p	MIMAT0000210	Macf1	11426	19536157
mmu-miR-181a-5p	MIMAT0000210	Magea5	17141	25083871
mmu-miR-181a-5p	MIMAT0000210	Magel2	27385	19536157
mmu-miR-181a-5p	MIMAT0000210	Man2a1	17158	19536157
mmu-miR-181a-5p	MIMAT0000210	Manea	242362	19536157
mmu-miR-181a-5p	MIMAT0000210	Map1a	17754	19536157
mmu-miR-181a-5p	MIMAT0000210	Map2k1	26395	19536157
mmu-miR-181a-5p	MIMAT0000210	Map3k1	26401	19536157
mmu-miR-181a-5p	MIMAT0000210	Map3k10	269881	19536157
mmu-miR-181a-5p	MIMAT0000210	Map3k7	26409	19536157
mmu-miR-181a-5p	MIMAT0000210	Mboat2	67216	19536157
mmu-miR-181a-5p	MIMAT0000210	Mboat7	77582	19536157
mmu-miR-181a-5p	MIMAT0000210	Mcl1	17210	19536157
mmu-miR-181a-5p	MIMAT0000210	Mecp2	17257	23650073
mmu-miR-181a-5p	MIMAT0000210	Med8	80509	19536157
mmu-miR-181a-5p	MIMAT0000210	Megf9	230316	19536157
mmu-miR-181a-5p	MIMAT0000210	Mfap3	216760	19536157
mmu-miR-181a-5p	MIMAT0000210	Mfhas1	52065	19536157
mmu-miR-181a-5p	MIMAT0000210	Mllt6	246198	19536157
mmu-miR-181a-5p	MIMAT0000210	Morc2a	74522	19536157
mmu-miR-181a-5p	MIMAT0000210	Mpp1	17524	19536157
mmu-miR-181a-5p	MIMAT0000210	Mpp5	56217	19536157
mmu-miR-181a-5p	MIMAT0000210	Ms4a4c	64380	21258322
mmu-miR-181a-5p	MIMAT0000210	Ms4a4c	64380	23597149
mmu-miR-181a-5p	MIMAT0000210	Ms4a4c	64380	19536157
mmu-miR-181a-5p	MIMAT0000210	Msx2	17702	22937097
mmu-miR-181a-5p	MIMAT0000210	Mycn	18109	19536157
mmu-miR-181a-5p	MIMAT0000210	Myo5a	17918	19536157
mmu-miR-181a-5p	MIMAT0000210	N4bp2	333789	19536157
mmu-miR-181a-5p	MIMAT0000210	Naa16	66897	19536157
mmu-miR-181a-5p	MIMAT0000210	Nacc1	66830	23142080
mmu-miR-181a-5p	MIMAT0000210	Nat8l	269642	19536157
mmu-miR-181a-5p	MIMAT0000210	Ndrg2	29811	19536157
mmu-miR-181a-5p	MIMAT0000210	Nell2	54003	19536157
mmu-miR-181a-5p	MIMAT0000210	Nfat5	54446	19536157
mmu-miR-181a-5p	MIMAT0000210	Nfia	18027	19536157
mmu-miR-181a-5p	MIMAT0000210	Nid1	18073	19536157
mmu-miR-181a-5p	MIMAT0000210	Nipa2	93790	19536157
mmu-miR-181a-5p	MIMAT0000210	Nktr	18087	19536157
mmu-miR-181a-5p	MIMAT0000210	Nptn	20320	19536157
mmu-miR-181a-5p	MIMAT0000210	Nr2c2	22026	19536157
mmu-miR-181a-5p	MIMAT0000210	Nr6a1	14536	19536157
mmu-miR-181a-5p	MIMAT0000210	Nrep	27528	19536157
mmu-miR-181a-5p	MIMAT0000210	Nsmaf	18201	19536157
mmu-miR-181a-5p	MIMAT0000210	Nt5e	23959	19536157
mmu-miR-181a-5p	MIMAT0000210	Ntrk2	18212	19536157
mmu-miR-181a-5p	MIMAT0000210	Nup98	269966	19536157
mmu-miR-181a-5p	MIMAT0000210	Oat	18242	19536157
mmu-miR-181a-5p	MIMAT0000210	Ogt	108155	19536157
mmu-miR-181a-5p	MIMAT0000210	Olfm1	56177	19536157
mmu-miR-181a-5p	MIMAT0000210	Opcml	330908	19536157
mmu-miR-181a-5p	MIMAT0000210	Osbp2	74309	19536157
mmu-miR-181a-5p	MIMAT0000210	Osbpl3	71720	25083871
mmu-miR-181a-5p	MIMAT0000210	Otud4	73945	19536157
mmu-miR-181a-5p	MIMAT0000210	Otud7b	229603	19536157
mmu-miR-181a-5p	MIMAT0000210	Oxr1	170719	19536157
mmu-miR-181a-5p	MIMAT0000210	Pafah1b1	18472	19536157
mmu-miR-181a-5p	MIMAT0000210	Paqr8	74229	19536157
mmu-miR-181a-5p	MIMAT0000210	Pard6g	93737	19536157
mmu-miR-181a-5p	MIMAT0000210	Parm1	231440	19536157
mmu-miR-181a-5p	MIMAT0000210	Patz1	56218	19536157
mmu-miR-181a-5p	MIMAT0000210	Pcdh7	54216	19536157
mmu-miR-181a-5p	MIMAT0000210	Pcnx	54604	19536157
mmu-miR-181a-5p	MIMAT0000210	Pcyox1	66881	19536157
mmu-miR-181a-5p	MIMAT0000210	Pdhb	68263	19536157
mmu-miR-181a-5p	MIMAT0000210	Pdia3	14827	19536157
mmu-miR-181a-5p	MIMAT0000210	Pdrg1	68559	19536157
mmu-miR-181a-5p	MIMAT0000210	Phactr2	215789	19536157
mmu-miR-181a-5p	MIMAT0000210	Pi4k2a	84095	19536157
mmu-miR-181a-5p	MIMAT0000210	Pisd	320951	19536157
mmu-miR-181a-5p	MIMAT0000210	Pkia	18767	19536157
mmu-miR-181a-5p	MIMAT0000210	Plcl2	224860	19536157
mmu-miR-181a-5p	MIMAT0000210	Pld5	319455	19536157
mmu-miR-181a-5p	MIMAT0000210	Plekha1	101476	19536157
mmu-miR-181a-5p	MIMAT0000210	Plod3	26433	19536157
mmu-miR-181a-5p	MIMAT0000210	Ppap2b	67916	19536157
mmu-miR-181a-5p	MIMAT0000210	Ppfia2	327814	19536157
mmu-miR-181a-5p	MIMAT0000210	Ppip5k2	227399	19536157
mmu-miR-181a-5p	MIMAT0000210	Ppp1cb	19046	19536157
mmu-miR-181a-5p	MIMAT0000210	Ppp1r9a	243725	19536157
mmu-miR-181a-5p	MIMAT0000210	Ppp2r2c	269643	19536157
mmu-miR-181a-5p	MIMAT0000210	Ppp3r1	19058	19536157
mmu-miR-181a-5p	MIMAT0000210	Prdm4	72843	19536157
mmu-miR-181a-5p	MIMAT0000210	Prkcb	18751	19536157
mmu-miR-181a-5p	MIMAT0000210	Prkci	18759	19536157
mmu-miR-181a-5p	MIMAT0000210	Prox1	19130	19536157
mmu-miR-181a-5p	MIMAT0000210	Prpf39	328110	19536157
mmu-miR-181a-5p	MIMAT0000210	Prpf8	192159	19536157
mmu-miR-181a-5p	MIMAT0000210	Prrc2c	226562	19536157
mmu-miR-181a-5p	MIMAT0000210	Prrg1	546336	19536157
mmu-miR-181a-5p	MIMAT0000210	Prrg3	208748	19536157
mmu-miR-181a-5p	MIMAT0000210	Psap	19156	19536157
mmu-miR-181a-5p	MIMAT0000210	Ptbp3	230257	19536157
mmu-miR-181a-5p	MIMAT0000210	Ptch1	19206	19536157
mmu-miR-181a-5p	MIMAT0000210	Ptchd2	242748	25083871
mmu-miR-181a-5p	MIMAT0000210	Ptchd2	242748	23597149
mmu-miR-181a-5p	MIMAT0000210	Ptpn11	19247	19536157
mmu-miR-181a-5p	MIMAT0000210	Ptpn5	19259	19536157
mmu-miR-181a-5p	MIMAT0000210	Ptprd	19266	19536157
mmu-miR-181a-5p	MIMAT0000210	Qk	19317	19536157
mmu-miR-181a-5p	MIMAT0000210	Rab27b	80718	19536157
mmu-miR-181a-5p	MIMAT0000210	Rad51d	19364	25083871
mmu-miR-181a-5p	MIMAT0000210	Rad54l2	81000	19536157
mmu-miR-181a-5p	MIMAT0000210	Rassf2	215653	19536157
mmu-miR-181a-5p	MIMAT0000210	Rdx	19684	19536157
mmu-miR-181a-5p	MIMAT0000210	Reep1	52250	19536157
mmu-miR-181a-5p	MIMAT0000210	Rgs4	19736	23262291
mmu-miR-181a-5p	MIMAT0000210	Rgs7bp	52882	19536157
mmu-miR-181a-5p	MIMAT0000210	Rhbdf2	217344	19536157
mmu-miR-181a-5p	MIMAT0000210	Ric3	320360	19536157
mmu-miR-181a-5p	MIMAT0000210	Rnf19a	30945	19536157
mmu-miR-181a-5p	MIMAT0000210	Robo2	268902	19536157
mmu-miR-181a-5p	MIMAT0000210	Rorb	225998	19536157
mmu-miR-181a-5p	MIMAT0000210	Rpap2	231571	19536157
mmu-miR-181a-5p	MIMAT0000210	Rsbn1	229675	19536157
mmu-miR-181a-5p	MIMAT0000210	Rsrc2	208606	19536157
mmu-miR-181a-5p	MIMAT0000210	Rtn4	68585	19536157
mmu-miR-181a-5p	MIMAT0000210	Runx1	12394	17344418
mmu-miR-181a-5p	MIMAT0000210	S1pr1	13609	19536157
mmu-miR-181a-5p	MIMAT0000210	Samd10	229011	19536157
mmu-miR-181a-5p	MIMAT0000210	Sash1	70097	19536157
mmu-miR-181a-5p	MIMAT0000210	Sc5d	235293	19536157
mmu-miR-181a-5p	MIMAT0000210	Scai	320271	19536157
mmu-miR-181a-5p	MIMAT0000210	Scamp1	107767	19536157
mmu-miR-181a-5p	MIMAT0000210	Scd1	20249	19536157
mmu-miR-181a-5p	MIMAT0000210	Scn4b	399548	19536157
mmu-miR-181a-5p	MIMAT0000210	Sdf2l1	64136	19536157
mmu-miR-181a-5p	MIMAT0000210	Sec11a	56529	19536157
mmu-miR-181a-5p	MIMAT0000210	Sec31a	69162	19536157
mmu-miR-181a-5p	MIMAT0000210	Sema3c	20348	19536157
mmu-miR-181a-5p	MIMAT0000210	Sema4c	20353	19536157
mmu-miR-181a-5p	MIMAT0000210	Sema4f	20355	19536157
mmu-miR-181a-5p	MIMAT0000210	Sema5a	20356	19536157
mmu-miR-181a-5p	MIMAT0000210	Sep 15	93684	19536157
mmu-miR-181a-5p	MIMAT0000210	Sep3	24050	19536157
mmu-miR-181a-5p	MIMAT0000210	Sep6	56526	19536157
mmu-miR-181a-5p	MIMAT0000210	Sf3b1	81898	19536157
mmu-miR-181a-5p	MIMAT0000210	Sfmbt1	54650	19536157
mmu-miR-181a-5p	MIMAT0000210	Sfr1	67788	19536157
mmu-miR-181a-5p	MIMAT0000210	Sfrp1	20377	19536157
mmu-miR-181a-5p	MIMAT0000210	Sfrs18	66625	19536157
mmu-miR-181a-5p	MIMAT0000210	Sgpp1	81535	25083871
mmu-miR-181a-5p	MIMAT0000210	Sirpa	19261	19536157
mmu-miR-181a-5p	MIMAT0000210	Slc17a5	235504	19536157
mmu-miR-181a-5p	MIMAT0000210	Slc1a2	20511	19536157
mmu-miR-181a-5p	MIMAT0000210	Slc22a23	73102	19536157
mmu-miR-181a-5p	MIMAT0000210	Slc23a2	54338	19536157
mmu-miR-181a-5p	MIMAT0000210	Slc24a2	76376	19536157
mmu-miR-181a-5p	MIMAT0000210	Slc25a51	230125	19536157
mmu-miR-181a-5p	MIMAT0000210	Slc38a2	67760	19536157
mmu-miR-181a-5p	MIMAT0000210	Slc4a10	94229	19536157
mmu-miR-181a-5p	MIMAT0000210	Slc50a1	19729	19536157
mmu-miR-181a-5p	MIMAT0000210	Slc7a11	26570	19536157
mmu-miR-181a-5p	MIMAT0000210	Slc9a6	236794	19536157
mmu-miR-181a-5p	MIMAT0000210	Smad5	17129	19536157
mmu-miR-181a-5p	MIMAT0000210	Smarca4	20586	23142080
mmu-miR-181a-5p	MIMAT0000210	Smarca4	20586	26203562
mmu-miR-181a-5p	MIMAT0000210	Smarca4	20586	25083871
mmu-miR-181a-5p	MIMAT0000210	Smarca4	20586	21258322
mmu-miR-181a-5p	MIMAT0000210	Smarca4	20586	23597149
mmu-miR-181a-5p	MIMAT0000210	Snx30	209131	19536157
mmu-miR-181a-5p	MIMAT0000210	Soga1	320706	19536157
mmu-miR-181a-5p	MIMAT0000210	Sos1	20662	19536157
mmu-miR-181a-5p	MIMAT0000210	Sowaha	237761	19536157
mmu-miR-181a-5p	MIMAT0000210	Spag9	70834	19536157
mmu-miR-181a-5p	MIMAT0000210	Spin1	20729	19536157
mmu-miR-181a-5p	MIMAT0000210	Spire1	68166	19536157
mmu-miR-181a-5p	MIMAT0000210	Spp1	20750	25083871
mmu-miR-181a-5p	MIMAT0000210	Sprn	212518	19536157
mmu-miR-181a-5p	MIMAT0000210	Srgap1	117600	19536157
mmu-miR-181a-5p	MIMAT0000210	Srgap2	14270	19536157
mmu-miR-181a-5p	MIMAT0000210	Ssr3	67437	19536157
mmu-miR-181a-5p	MIMAT0000210	St8sia4	20452	19536157
mmu-miR-181a-5p	MIMAT0000210	Stk32a	269019	25083871
mmu-miR-181a-5p	MIMAT0000210	Stk32a	269019	19536157
mmu-miR-181a-5p	MIMAT0000210	Strip2	320609	19536157
mmu-miR-181a-5p	MIMAT0000210	Stxbp6	217517	19536157
mmu-miR-181a-5p	MIMAT0000210	Sulf2	72043	19536157
mmu-miR-181a-5p	MIMAT0000210	Sv2b	64176	19536157
mmu-miR-181a-5p	MIMAT0000210	Swt1	66875	19536157
mmu-miR-181a-5p	MIMAT0000210	Syncrip	56403	19536157
mmu-miR-181a-5p	MIMAT0000210	Sypl	19027	19536157
mmu-miR-181a-5p	MIMAT0000210	Syt2	20980	19536157
mmu-miR-181a-5p	MIMAT0000210	Tanc2	77097	19536157
mmu-miR-181a-5p	MIMAT0000210	Taok1	216965	19536157
mmu-miR-181a-5p	MIMAT0000210	Tbl1xr1	81004	19536157
mmu-miR-181a-5p	MIMAT0000210	Tbpl1	237336	19536157
mmu-miR-181a-5p	MIMAT0000210	Tbr1	21375	23262291
mmu-miR-181a-5p	MIMAT0000210	Tcf4	21413	19536157
mmu-miR-181a-5p	MIMAT0000210	Tgfbi	21810	23262291
mmu-miR-181a-5p	MIMAT0000210	Tgfbr3	21814	19536157
mmu-miR-181a-5p	MIMAT0000210	Timp3	21859	19536157
mmu-miR-181a-5p	MIMAT0000210	Tlk1	228012	19536157
mmu-miR-181a-5p	MIMAT0000210	Tmcc1	330401	19536157
mmu-miR-181a-5p	MIMAT0000210	Tmeff1	230157	19536157
mmu-miR-181a-5p	MIMAT0000210	Tmem130	243339	19536157
mmu-miR-181a-5p	MIMAT0000210	Tmem135	72759	19536157
mmu-miR-181a-5p	MIMAT0000210	Tmem167	66074	19536157
mmu-miR-181a-5p	MIMAT0000210	Tmem168	101118	19536157
mmu-miR-181a-5p	MIMAT0000210	Tmem170	66817	19536157
mmu-miR-181a-5p	MIMAT0000210	Tmem245	242474	19536157
mmu-miR-181a-5p	MIMAT0000210	Tmem87b	72477	19536157
mmu-miR-181a-5p	MIMAT0000210	Tnfaip1	21927	19536157
mmu-miR-181a-5p	MIMAT0000210	Tnfaip8l3	244882	19536157
mmu-miR-181a-5p	MIMAT0000210	Tnfrsf19	29820	19536157
mmu-miR-181a-5p	MIMAT0000210	Tnks	21951	19536157
mmu-miR-181a-5p	MIMAT0000210	Tnpo1	238799	19536157
mmu-miR-181a-5p	MIMAT0000210	Tob2	57259	19536157
mmu-miR-181a-5p	MIMAT0000210	Tom1l1	71943	19536157
mmu-miR-181a-5p	MIMAT0000210	Tor1aip2	240832	19536157
mmu-miR-181a-5p	MIMAT0000210	Tox	252838	17344418
mmu-miR-181a-5p	MIMAT0000210	Tpm1	22003	19536157
mmu-miR-181a-5p	MIMAT0000210	Trak1	67095	19536157
mmu-miR-181a-5p	MIMAT0000210	Trim2	80890	25083871
mmu-miR-181a-5p	MIMAT0000210	Trim2	80890	19536157
mmu-miR-181a-5p	MIMAT0000210	Trim9	94090	19536157
mmu-miR-181a-5p	MIMAT0000210	Trp53inp2	68728	19536157
mmu-miR-181a-5p	MIMAT0000210	Trpm3	226025	19536157
mmu-miR-181a-5p	MIMAT0000210	Tsc22d2	72033	19536157
mmu-miR-181a-5p	MIMAT0000210	Tsn	22099	19536157
mmu-miR-181a-5p	MIMAT0000210	Ttc14	67120	19536157
mmu-miR-181a-5p	MIMAT0000210	Ttc3	22129	19536157
mmu-miR-181a-5p	MIMAT0000210	Ttyh1	57776	19536157
mmu-miR-181a-5p	MIMAT0000210	Ttyh3	78339	19536157
mmu-miR-181a-5p	MIMAT0000210	Tub	22141	19536157
mmu-miR-181a-5p	MIMAT0000210	Tulp3	22158	25083871
mmu-miR-181a-5p	MIMAT0000210	Twsg1	65960	19536157
mmu-miR-181a-5p	MIMAT0000210	Uba2	50995	19536157
mmu-miR-181a-5p	MIMAT0000210	Ubash3b	72828	19536157
mmu-miR-181a-5p	MIMAT0000210	Ube2n	93765	19536157
mmu-miR-181a-5p	MIMAT0000210	Ube2r2	67615	19536157
mmu-miR-181a-5p	MIMAT0000210	Ubtf	21429	19536157
mmu-miR-181a-5p	MIMAT0000210	Usp2	53376	19536157
mmu-miR-181a-5p	MIMAT0000210	Usp33	170822	19536157
mmu-miR-181a-5p	MIMAT0000210	Usp45	77593	19536157
mmu-miR-181a-5p	MIMAT0000210	Vamp3	22319	19536157
mmu-miR-181a-5p	MIMAT0000210	Vezt	215008	19536157
mmu-miR-181a-5p	MIMAT0000210	Wdr13	73447	19536157
mmu-miR-181a-5p	MIMAT0000210	Wdr37	207615	19536157
mmu-miR-181a-5p	MIMAT0000210	Wdr41	218460	19536157
mmu-miR-181a-5p	MIMAT0000210	Xiap	11798	23650073
mmu-miR-181a-5p	MIMAT0000210	Ybx3	56449	19536157
mmu-miR-181a-5p	MIMAT0000210	Yod1	226418	19536157
mmu-miR-181a-5p	MIMAT0000210	Ywhag	22628	19536157
mmu-miR-181a-5p	MIMAT0000210	Zbtb41	226470	19536157
mmu-miR-181a-5p	MIMAT0000210	Zdhhc17	320150	19536157
mmu-miR-181a-5p	MIMAT0000210	Zdhhc7	102193	19536157
mmu-miR-181a-5p	MIMAT0000210	Zfp449	78619	19536157
mmu-miR-181a-5p	MIMAT0000210	Zfp512	269639	19536157
mmu-miR-181a-5p	MIMAT0000210	Zfp568	243905	19536157
mmu-miR-181a-5p	MIMAT0000210	Zfp60	22718	19536157
mmu-miR-181a-5p	MIMAT0000210	Zfp62	22720	19536157
mmu-miR-181a-5p	MIMAT0000210	Zfp655	72611	19536157
mmu-miR-181a-5p	MIMAT0000210	Zfp689	71131	21258322
mmu-miR-181a-5p	MIMAT0000210	Zfp937	245174	19536157
mmu-miR-181a-5p	MIMAT0000210	Zfyve20	78287	19536157
mmu-miR-181a-5p	MIMAT0000210	Zic1	22771	19536157
mmu-miR-181a-5p	MIMAT0000210	Zmat3	22401	19536157
mmu-miR-181a-5p	MIMAT0000210	Zyg11b	414872	19536157
mmu-miR-181a-5p	MIMAT0000210	Zzef1	195018	19536157
miRNA	MIMATid	Gene	EntrezID	PMID
mmu-miR-451a	MIMAT0001632	Abhd17b	226016	19536157
mmu-miR-451a	MIMAT0001632	Akt3	23797	19536157
mmu-miR-451a	MIMAT0001632	Ankrd17	81702	19536157
mmu-miR-451a	MIMAT0001632	Arnt2	11864	19536157
mmu-miR-451a	MIMAT0001632	Atf2	11909	19536157
mmu-miR-451a	MIMAT0001632	Avl9	78937	19536157
mmu-miR-451a	MIMAT0001632	AW549877	106064	23597149
mmu-miR-451a	MIMAT0001632	AW549877	106064	19536157
mmu-miR-451a	MIMAT0001632	Cab39	12283	23705032
mmu-miR-451a	MIMAT0001632	Clstn1	65945	19536157
mmu-miR-451a	MIMAT0001632	D14Abb1e	218850	19536157
mmu-miR-451a	MIMAT0001632	Ddx19b	234733	19536157
mmu-miR-451a	MIMAT0001632	Gdap1	14545	19536157
mmu-miR-451a	MIMAT0001632	Gm2a	14667	19536157
mmu-miR-451a	MIMAT0001632	Gnai3	14679	19536157
mmu-miR-451a	MIMAT0001632	Grin3a	242443	19536157
mmu-miR-451a	MIMAT0001632	Hey1	15213	19536157
mmu-miR-451a	MIMAT0001632	Ik	24010	19536157
mmu-miR-451a	MIMAT0001632	Ints10	70885	19536157
mmu-miR-451a	MIMAT0001632	Klhl5	71778	19536157
mmu-miR-451a	MIMAT0001632	Limch1	77569	19536157
mmu-miR-451a	MIMAT0001632	Lonrf2	381338	19536157
mmu-miR-451a	MIMAT0001632	Lphn2	99633	19536157
mmu-miR-451a	MIMAT0001632	Lsm14a	67070	19536157
mmu-miR-451a	MIMAT0001632	Megf9	230316	19536157
mmu-miR-451a	MIMAT0001632	Myc	17869	21464222
mmu-miR-451a	MIMAT0001632	Nsmaf	18201	19536157
mmu-miR-451a	MIMAT0001632	Nucks1	98415	19536157
mmu-miR-451a	MIMAT0001632	Pom121	107939	19536157
mmu-miR-451a	MIMAT0001632	Ppm1l	242083	19536157
mmu-miR-451a	MIMAT0001632	Prkaa1	105787	23705032
mmu-miR-451a	MIMAT0001632	Rnf103	22644	19536157
mmu-miR-451a	MIMAT0001632	Scn8a	20273	19536157
mmu-miR-451a	MIMAT0001632	Setd5	72895	19536157
mmu-miR-451a	MIMAT0001632	Shank2	210274	19536157
mmu-miR-451a	MIMAT0001632	Sidt2	214597	19536157
mmu-miR-451a	MIMAT0001632	Snrk	20623	19536157
mmu-miR-451a	MIMAT0001632	Sptssa	104725	19536157
mmu-miR-451a	MIMAT0001632	Syp	20977	19536157
mmu-miR-451a	MIMAT0001632	Tenm2	23964	19536157
mmu-miR-451a	MIMAT0001632	Thbd	21824	19536157
mmu-miR-451a	MIMAT0001632	Thrsp	21835	19536157
mmu-miR-451a	MIMAT0001632	Trim33	94093	19536157
mmu-miR-451a	MIMAT0001632	Trpc3	22065	19536157
mmu-miR-451a	MIMAT0001632	Vezt	215008	19536157
mmu-miR-451a	MIMAT0001632	Xiap	11798	19536157
mmu-miR-451a	MIMAT0001632	Ywhaz	22631	21827757
mmu-miR-451a	MIMAT0001632	Zfp644	52397	25083871

## Sheet: Predicted 3'UTR-targets
miRNA	MIMATid	Gene	EntrezID	RefseqID	Start position of miRNA seed	Seed length	Seed Start	Seed End	Pvalue
mmu-miR-181a-5p	MIMAT0000210	0610010B08Rik	100039060	NM_001177543	1	9	2122	2114	0.011
mmu-miR-181a-5p	MIMAT0000210	1110004E09Rik	68001	NM_026502	1	7	1133	1127	0.0098
mmu-miR-181a-5p	MIMAT0000210	1700066M21Rik	73467	NM_028546	1	9	1195	1187	0.0071
mmu-miR-181a-5p	MIMAT0000210	1810011O10Rik	69068	NM_026931	1	8	890	883	0.0145
mmu-miR-181a-5p	MIMAT0000210	2010300C02Rik	72097	NM_028096	1	7	3992	3986	0.0348
mmu-miR-181a-5p	MIMAT0000210	2310011J03Rik	66374	NM_025521	1	8	1101	1094	0.0165
mmu-miR-181a-5p	MIMAT0000210	2810416G20Rik	100040353	XM_003945668	1	8	1183	1176	0.0193
mmu-miR-181a-5p	MIMAT0000210	2900092C05Rik	73090	NM_028434	1	7	796	790	0.0179
mmu-miR-181a-5p	MIMAT0000210	3110047P20Rik	319807	NM_177006	1	10	8357	8348	0.0021
mmu-miR-181a-5p	MIMAT0000210	3830417A13Rik	70696	NM_027512	1	7	1531	1525	0.0257
mmu-miR-181a-5p	MIMAT0000210	4921511M17Rik	667256	NM_001201358	1	7	903	897	0.0073
mmu-miR-181a-5p	MIMAT0000210	4921524J17Rik	66714	NM_025722	1	9	1282	1274	0.0039
mmu-miR-181a-5p	MIMAT0000210	4922502D21Rik	381816	NM_199034	1	8	906	899	0.0123
mmu-miR-181a-5p	MIMAT0000210	4930427A07Rik	104732	NM_134041	1	8	2180	2173	0.0314
mmu-miR-181a-5p	MIMAT0000210	4930524B15Rik	67592	NM_026262	1	8	1332	1325	0.0216
mmu-miR-181a-5p	MIMAT0000210	4930563D23Rik	75328	NM_029252	1	8	2632	2625	0.0283
mmu-miR-181a-5p	MIMAT0000210	4933411K20Rik	66756	NM_025747	1	9	3987	3979	0.011
mmu-miR-181a-5p	MIMAT0000210	4933430I17Rik	214106	NM_177607	1	7	1644	1638	0.014
mmu-miR-181a-5p	MIMAT0000210	5031414D18Rik	271221	NM_198642	1	10	2644	2635	0.0004
mmu-miR-181a-5p	MIMAT0000210	5033411D12Rik	192136	NM_138654	1	7	1625	1619	0.0231
mmu-miR-181a-5p	MIMAT0000210	5730507C01Rik	236366	NM_001033157	1	8	1673	1666	0.0161
mmu-miR-181a-5p	MIMAT0000210	5730507C01Rik	236366	NM_001201330	1	8	1745	1738	0.0161
mmu-miR-181a-5p	MIMAT0000210	9030619P08Rik	105892	NM_001039720	1	7	679	673	0.0376
mmu-miR-181a-5p	MIMAT0000210	9430020K01Rik	240185	NM_001081963	1	8	4706	4699	0.0393
mmu-miR-181a-5p	MIMAT0000210	9930013L23Rik	80982	NM_030728	1	8	6589	6582	0.0413
mmu-miR-181a-5p	MIMAT0000210	A130010J15Rik	319266	NM_001160360	1	8	984	977	0.0403
mmu-miR-181a-5p	MIMAT0000210	A130010J15Rik	319266	NM_001160359	1	8	1136	1129	0.0403
mmu-miR-181a-5p	MIMAT0000210	A130010J15Rik	319266	NM_181048	1	8	1146	1139	0.0403
mmu-miR-181a-5p	MIMAT0000210	A330070K13Rik	381673	NM_198665	1	8	584	577	0.0026
mmu-miR-181a-5p	MIMAT0000210	A530054K11Rik	212281	NM_183146	1	8	4427	4420	0.0328
mmu-miR-181a-5p	MIMAT0000210	Aak1	269774	NM_177762	1	10	6346	6337	0.0151
mmu-miR-181a-5p	MIMAT0000210	Aak1	269774	NM_001040106	1	10	6589	6580	0.0151
mmu-miR-181a-5p	MIMAT0000210	Abca12	74591	NM_175210	1	8	8266	8259	0.0032
mmu-miR-181a-5p	MIMAT0000210	Abca5	217265	NM_147219	1	9	5184	5176	0.012
mmu-miR-181a-5p	MIMAT0000210	Abca6	76184	NM_001166557	1	7	1218	1212	0.015
mmu-miR-181a-5p	MIMAT0000210	Abcb1a	18671	NM_011076	1	8	4218	4211	0.0153
mmu-miR-181a-5p	MIMAT0000210	Ablim2	231148	NM_001177700	1	8	2467	2460	0.0235
mmu-miR-181a-5p	MIMAT0000210	Ablim2	231148	NM_001177699	1	8	2566	2559	0.0235
mmu-miR-181a-5p	MIMAT0000210	Ablim2	231148	NM_001177698	1	8	2569	2562	0.0235
mmu-miR-181a-5p	MIMAT0000210	Ablim2	231148	NM_177678	1	8	2584	2577	0.0235
mmu-miR-181a-5p	MIMAT0000210	Ablim2	231148	NM_001177697	1	8	2599	2592	0.0235
mmu-miR-181a-5p	MIMAT0000210	Ablim2	231148	NM_001177696	1	8	2740	2733	0.0235
mmu-miR-181a-5p	MIMAT0000210	Acer2	230379	NM_139306	1	8	3348	3341	0.0491
mmu-miR-181a-5p	MIMAT0000210	Acsl1	14081	NM_007981	1	9	3789	3781	0.006
mmu-miR-181a-5p	MIMAT0000210	Actl6a	56456	NM_019673	1	7	1683	1677	0.0223
mmu-miR-181a-5p	MIMAT0000210	Actr10	56444	NM_019785	1	8	1700	1693	0.0399
mmu-miR-181a-5p	MIMAT0000210	Adck3	67426	NM_001163290	1	9	3430	3422	0.0073
mmu-miR-181a-5p	MIMAT0000210	Adck3	67426	NM_023341	1	9	3528	3520	0.0073
mmu-miR-181a-5p	MIMAT0000210	Adcy1	432530	NM_009622	1	9	8113	8105	0.033
mmu-miR-181a-5p	MIMAT0000210	Adh4	26876	NM_011996	1	7	1195	1189	0.0087
mmu-miR-181a-5p	MIMAT0000210	Agfg2	231801	NM_145566	1	8	1397	1390	0.0078
mmu-miR-181a-5p	MIMAT0000210	Aggf1	66549	NM_025630	1	7	2978	2972	0.0492
mmu-miR-181a-5p	MIMAT0000210	Agxt2	268782	NM_001031851	1	7	1704	1698	0.011
mmu-miR-181a-5p	MIMAT0000210	Akap6	238161	NM_198111	1	8	10096	10089	0.0483
mmu-miR-181a-5p	MIMAT0000210	Akt2	11652	NM_007434	1	8	2473	2466	0.0204
mmu-miR-181a-5p	MIMAT0000210	Akt2	11652	NM_001110208	1	8	2715	2708	0.0204
mmu-miR-181a-5p	MIMAT0000210	Akt3	23797	NM_011785	1	10	3495	3486	0.0031
mmu-miR-181a-5p	MIMAT0000210	Aldh1l2	216188	NM_153543	1	8	3703	3696	0.0467
mmu-miR-181a-5p	MIMAT0000210	Aldh3a2	11671	NM_007437	1	10	2346	2337	0.0015
mmu-miR-181a-5p	MIMAT0000210	Aldh3b2	621603	NM_001177438	1	7	1820	1814	0.0285
mmu-miR-181a-5p	MIMAT0000210	Amotl1	75723	NM_001081395	1	9	8538	8530	0.022
mmu-miR-181a-5p	MIMAT0000210	Anapc16	52717	NM_025514	1	9	1218	1210	0.0031
mmu-miR-181a-5p	MIMAT0000210	Ankmy2	217473	NM_146033	1	8	2008	2001	0.0137
mmu-miR-181a-5p	MIMAT0000210	Ankrd39	109346	NM_026241	1	8	1620	1613	0.0184
mmu-miR-181a-5p	MIMAT0000210	Ankrd49	56503	NM_019683	1	9	1377	1369	0.0037
mmu-miR-181a-5p	MIMAT0000210	Ankrd50	99696	NM_001167883	1	8	3325	3318	0.047
mmu-miR-181a-5p	MIMAT0000210	Anln	68743	NM_028390	1	8	4753	4746	0.0276
mmu-miR-181a-5p	MIMAT0000210	Ap1s2	108012	NM_026887	1	8	1945	1938	0.039
mmu-miR-181a-5p	MIMAT0000210	Api5	11800	NM_007466	1	9	2943	2935	0.0077
mmu-miR-181a-5p	MIMAT0000210	Apol10a	245282	NM_177744	1	8	2610	2603	0.0293
mmu-miR-181a-5p	MIMAT0000210	Arf3	11842	NM_007478	1	9	3079	3071	0.0103
mmu-miR-181a-5p	MIMAT0000210	Arf6	11845	NM_007481	1	8	3266	3259	0.0399
mmu-miR-181a-5p	MIMAT0000210	Arfgef2	99371	NM_001085495	1	9	5955	5947	0.0124
mmu-miR-181a-5p	MIMAT0000210	Arhgap15	76117	NM_001025377	1	8	1217	1210	0.018
mmu-miR-181a-5p	MIMAT0000210	Arhgef10l	72754	NM_172415	1	7	4174	4168	0.0319
mmu-miR-181a-5p	MIMAT0000210	Arhgef10l	72754	NM_001112723	1	7	4057	4051	0.0319
mmu-miR-181a-5p	MIMAT0000210	Arhgef10l	72754	NM_001112722	1	7	4099	4093	0.0319
mmu-miR-181a-5p	MIMAT0000210	Arhgef28	110596	NM_012026	1	8	5731	5724	0.0159
mmu-miR-181a-5p	MIMAT0000210	Arhgef37	328967	NM_177828	1	8	2480	2473	0.0158
mmu-miR-181a-5p	MIMAT0000210	Arhgef7	54126	NM_001113517	1	8	4811	4804	0.0367
mmu-miR-181a-5p	MIMAT0000210	Arl5a	75423	NM_182994	1	10	1108	1099	0.0042
mmu-miR-181a-5p	MIMAT0000210	Armc8	74125	NM_028768	1	8	3866	3859	0.0353
mmu-miR-181a-5p	MIMAT0000210	Armcx6	278097	NM_001007578	1	8	1719	1712	0.0109
mmu-miR-181a-5p	MIMAT0000210	Arnt2	11864	NM_007488	1	9	5972	5964	0.0143
mmu-miR-181a-5p	MIMAT0000210	Arpp21	74100	NM_001177617	1	7	2505	2499	0.0273
mmu-miR-181a-5p	MIMAT0000210	Arrdc4	66412	NM_001042592	1	8	1739	1732	0.0372
mmu-miR-181a-5p	MIMAT0000210	Asb15	78910	NM_080847	1	8	3832	3825	0.0358
mmu-miR-181a-5p	MIMAT0000210	Asb4	65255	NM_023048	1	10	1985	1976	0.0019
mmu-miR-181a-5p	MIMAT0000210	Ascl4	67341	NM_001163614	1	9	557	549	0.0028
mmu-miR-181a-5p	MIMAT0000210	Atad5	237877	NM_001029856	1	8	6040	6033	0.0214
mmu-miR-181a-5p	MIMAT0000210	Atf2	11909	NM_009715	1	9	3026	3018	0.0092
mmu-miR-181a-5p	MIMAT0000210	Atf2	11909	NM_001025093	1	9	3123	3115	0.0092
mmu-miR-181a-5p	MIMAT0000210	Atf7ip2	75329	NM_153123	1	9	1543	1535	0.0042
mmu-miR-181a-5p	MIMAT0000210	Atg5	11793	NM_053069	1	8	2345	2338	0.0187
mmu-miR-181a-5p	MIMAT0000210	Atp11c	320940	NM_001001798	1	8	4486	4479	0.0369
mmu-miR-181a-5p	MIMAT0000210	Atp11c	320940	NM_001037863	1	8	4591	4584	0.0379
mmu-miR-181a-5p	MIMAT0000210	Atp1b1	11931	NM_009721	1	8	2286	2279	0.0178
mmu-miR-181a-5p	MIMAT0000210	Atp5l	27425	NM_013795	1	9	436	428	0.0005
mmu-miR-181a-5p	MIMAT0000210	Atp8b4	241633	NM_001080944	1	8	4275	4268	0.0276
mmu-miR-181a-5p	MIMAT0000210	Aurkb	20877	NM_011496	1	10	1826	1817	0.0006
mmu-miR-181a-5p	MIMAT0000210	AY358078	278676	NM_194347	1	9	1450	1442	0.0002
mmu-miR-181a-5p	MIMAT0000210	B3galt5	93961	NM_033149	1	9	1684	1676	0.0143
mmu-miR-181a-5p	MIMAT0000210	B3galt5	93961	NM_001122993	1	9	2051	2043	0.0143
mmu-miR-181a-5p	MIMAT0000210	B3gat2	280645	NM_172124	1	8	3996	3989	0.0401
mmu-miR-181a-5p	MIMAT0000210	B4galnt1	14421	NM_001244618	1	8	1008	1001	0.0094
mmu-miR-181a-5p	MIMAT0000210	B4galnt1	14421	NM_001244617	1	8	1199	1192	0.0094
mmu-miR-181a-5p	MIMAT0000210	Bai3	210933	NM_175642	1	8	5260	5253	0.0105
mmu-miR-181a-5p	MIMAT0000210	Bard1	12021	NM_007525	1	8	3136	3129	0.0445
mmu-miR-181a-5p	MIMAT0000210	Bcl2l1	12048	NM_009743	1	8	1505	1498	0.0223
mmu-miR-181a-5p	MIMAT0000210	Bhlhe41	79362	NM_024469	1	9	2514	2506	0.0174
mmu-miR-181a-5p	MIMAT0000210	Birc6	12211	NM_007566	1	8	15107	15100	0.015
mmu-miR-181a-5p	MIMAT0000210	Brd1	223770	NM_001033274	1	9	4200	4192	0.0048
mmu-miR-181a-5p	MIMAT0000210	Brd8	78656	NM_030147	1	9	3904	3896	0.006
mmu-miR-181a-5p	MIMAT0000210	Btbd3	228662	NM_001025431	1	10	4543	4534	0.0028
mmu-miR-181a-5p	MIMAT0000210	Btbd3	228662	NM_145534	1	10	4845	4836	0.0028
mmu-miR-181a-5p	MIMAT0000210	Btc	12223	NM_007568	1	8	911	904	0.0311
mmu-miR-181a-5p	MIMAT0000210	Btk	12229	NM_013482	1	7	2493	2487	0.0238
mmu-miR-181a-5p	MIMAT0000210	C030048H21Rik	77481	XM_003945328	1	9	1877	1869	0.0109
mmu-miR-181a-5p	MIMAT0000210	C1qtnf7	109323	NM_175425	1	8	965	958	0.0054
mmu-miR-181a-5p	MIMAT0000210	C1qtnf7	109323	NM_001135172	1	8	1322	1315	0.0054
mmu-miR-181a-5p	MIMAT0000210	Cabs1	70977	NM_027631	1	11	1363	1353	0.0001
mmu-miR-181a-5p	MIMAT0000210	Cadps2	320405	NM_001252107	1	7	3006	3000	0.0334
mmu-miR-181a-5p	MIMAT0000210	Calb1	12307	NM_009788	1	9	1891	1883	0.0074
mmu-miR-181a-5p	MIMAT0000210	Camk2g	12325	NM_001039138	1	8	3601	3594	0.0302
mmu-miR-181a-5p	MIMAT0000210	Camk2g	12325	NM_178597	1	8	3634	3627	0.0302
mmu-miR-181a-5p	MIMAT0000210	Camk2g	12325	NM_001039139	1	8	3532	3525	0.0302
mmu-miR-181a-5p	MIMAT0000210	Cant1	76025	NM_001025618	1	8	1994	1987	0.0219
mmu-miR-181a-5p	MIMAT0000210	Cant1	76025	NM_001025617	1	8	2036	2029	0.0219
mmu-miR-181a-5p	MIMAT0000210	Cant1	76025	NM_001267592	1	8	2147	2140	0.0219
mmu-miR-181a-5p	MIMAT0000210	Cant1	76025	NM_029502	1	8	2188	2181	0.0219
mmu-miR-181a-5p	MIMAT0000210	Cant1	76025	NM_001267591	1	8	1837	1830	0.0219
mmu-miR-181a-5p	MIMAT0000210	Caprin1	53872	NM_001111292	1	9	3259	3251	0.0049
mmu-miR-181a-5p	MIMAT0000210	Caprin1	53872	NM_001111291	1	9	3299	3291	0.0049
mmu-miR-181a-5p	MIMAT0000210	Capza1	12340	NM_009797	1	8	1635	1628	0.033
mmu-miR-181a-5p	MIMAT0000210	Car11	12348	NM_009800	1	8	1388	1381	0.0024
mmu-miR-181a-5p	MIMAT0000210	Car2	12349	NM_009801	1	8	1552	1545	0.0106
mmu-miR-181a-5p	MIMAT0000210	Card6	239319	NM_001163138	1	8	4501	4494	0.0143
mmu-miR-181a-5p	MIMAT0000210	Casc3	192160	NM_138660	1	9	2506	2498	0.0061
mmu-miR-181a-5p	MIMAT0000210	Casp2	12366	NM_007610	1	8	3072	3065	0.0303
mmu-miR-181a-5p	MIMAT0000210	Casp3	12367	NM_009810	1	7	1262	1256	0.0341
mmu-miR-181a-5p	MIMAT0000210	Casp8ap2	26885	NM_001122978	1	7	6176	6170	0.0372
mmu-miR-181a-5p	MIMAT0000210	Casp8ap2	26885	NM_011997	1	7	6423	6417	0.0372
mmu-miR-181a-5p	MIMAT0000210	Catsperg2	76718	NM_029714	1	7	3643	3637	0.0253
mmu-miR-181a-5p	MIMAT0000210	Cblb	208650	NM_001033238	1	8	6317	6310	0.0499
mmu-miR-181a-5p	MIMAT0000210	Cbll1	104836	NM_001253848	1	8	3158	3151	0.0367
mmu-miR-181a-5p	MIMAT0000210	Cbll1	104836	NM_134048	1	8	3632	3625	0.0367
mmu-miR-181a-5p	MIMAT0000210	Cbll1	104836	NM_001253847	1	8	3635	3628	0.0367
mmu-miR-181a-5p	MIMAT0000210	Cbs	12411	NM_144855	1	7	2133	2127	0.034
mmu-miR-181a-5p	MIMAT0000210	Cbs	12411	NM_178224	1	7	2091	2085	0.034
mmu-miR-181a-5p	MIMAT0000210	Ccar1	67500	NM_026201	1	7	3712	3706	0.0497
mmu-miR-181a-5p	MIMAT0000210	Ccdc116	76872	NM_029779	1	8	2693	2686	0.0326
mmu-miR-181a-5p	MIMAT0000210	Ccdc116	76872	NM_001164606	1	8	2707	2700	0.0326
mmu-miR-181a-5p	MIMAT0000210	Ccdc132	73288	NM_001167750	1	8	4236	4229	0.0323
mmu-miR-181a-5p	MIMAT0000210	Ccdc138	76138	NM_001162956	1	7	2278	2272	0.0235
mmu-miR-181a-5p	MIMAT0000210	Ccdc141	545428	NM_001025576	1	8	6193	6186	0.0239
mmu-miR-181a-5p	MIMAT0000210	Ccdc42	276920	NM_177779	1	7	1154	1148	0.0136
mmu-miR-181a-5p	MIMAT0000210	Ccdc74a	72315	NM_001166164	1	7	1237	1231	0.0078
mmu-miR-181a-5p	MIMAT0000210	Ccdc83	75338	NM_029256	1	8	1539	1532	0.0076
mmu-miR-181a-5p	MIMAT0000210	Ccdc85a	216613	NM_001166661	1	8	3232	3225	0.0472
mmu-miR-181a-5p	MIMAT0000210	Ccdc85a	216613	NM_181577	1	8	3352	3345	0.0472
mmu-miR-181a-5p	MIMAT0000210	Ccl11	20292	NM_011330	1	7	1024	1018	0.0385
mmu-miR-181a-5p	MIMAT0000210	Ccna1	12427	NM_007628	1	7	1480	1474	0.0123
mmu-miR-181a-5p	MIMAT0000210	Ccnb1	268697	NM_172301	1	9	1512	1504	0.0036
mmu-miR-181a-5p	MIMAT0000210	Ccnf	12449	NM_007634	1	8	2470	2463	0.0101
mmu-miR-181a-5p	MIMAT0000210	Ccp110	101565	NM_182995	1	9	4823	4815	0.0065
mmu-miR-181a-5p	MIMAT0000210	Ccr1l1	12770	NM_007718	1	7	1192	1186	0.0235
mmu-miR-181a-5p	MIMAT0000210	Cd59a	12509	NM_007652	1	8	959	952	0.0179
mmu-miR-181a-5p	MIMAT0000210	Cd59a	12509	NM_001111060	1	8	1079	1072	0.0179
mmu-miR-181a-5p	MIMAT0000210	Cd96	84544	NM_032465	1	8	2081	2074	0.0036
mmu-miR-181a-5p	MIMAT0000210	Cdc40	71713	NM_027879	1	9	2950	2942	0.0059
mmu-miR-181a-5p	MIMAT0000210	Cdc7	12545	NM_009863	1	9	2923	2915	0.0041
mmu-miR-181a-5p	MIMAT0000210	Cdh8	12564	NM_001039154	1	8	3005	2998	0.0164
mmu-miR-181a-5p	MIMAT0000210	Cdkl3	213084	NM_001166657	1	7	1677	1671	0.0221
mmu-miR-181a-5p	MIMAT0000210	Cdkl3	213084	NM_001166655	1	7	1840	1834	0.013
mmu-miR-181a-5p	MIMAT0000210	Cdo1	12583	NM_033037	1	8	850	843	0.011
mmu-miR-181a-5p	MIMAT0000210	Cebpb	12608	NM_009883	1	7	1496	1490	0.0306
mmu-miR-181a-5p	MIMAT0000210	Cenpb	12616	NM_007682	1	8	2713	2706	0.0132
mmu-miR-181a-5p	MIMAT0000210	Cenpi	102920	NM_145924	1	9	3073	3065	0.0024
mmu-miR-181a-5p	MIMAT0000210	Cep41	83922	NM_031998	1	8	3355	3348	0.0339
mmu-miR-181a-5p	MIMAT0000210	Cep44	382010	NM_001009951	1	7	1243	1237	0.0123
mmu-miR-181a-5p	MIMAT0000210	Cep63	28135	NM_001081122	1	8	2602	2595	0.0042
mmu-miR-181a-5p	MIMAT0000210	Cep97	74201	NM_001159366	1	9	668	660	0.0012
mmu-miR-181a-5p	MIMAT0000210	Cep97	74201	NM_001159365	1	9	839	831	0.0018
mmu-miR-181a-5p	MIMAT0000210	Cep97	74201	NM_001159364	1	9	957	949	0.0023
mmu-miR-181a-5p	MIMAT0000210	Chd2	244059	NM_001081345	1	8	8467	8460	0.045
mmu-miR-181a-5p	MIMAT0000210	Clec1a	243653	NM_175526	1	8	2149	2142	0.0326
mmu-miR-181a-5p	MIMAT0000210	Clic6	209195	NM_172469	1	8	2556	2549	0.0248
mmu-miR-181a-5p	MIMAT0000210	Clip4	78785	NM_175378	1	7	1996	1990	0.0119
mmu-miR-181a-5p	MIMAT0000210	Cma1	17228	NM_010780	1	7	1021	1015	0.0129
mmu-miR-181a-5p	MIMAT0000210	Cnot4	53621	NM_001164412	1	10	2474	2465	0.001
mmu-miR-181a-5p	MIMAT0000210	Cnot4	53621	NM_001164414	1	10	2483	2474	0.001
mmu-miR-181a-5p	MIMAT0000210	Cnot4	53621	NM_001164413	1	10	2687	2678	0.001
mmu-miR-181a-5p	MIMAT0000210	Cnot6l	231464	NM_144910	1	9	2062	2054	0.0015
mmu-miR-181a-5p	MIMAT0000210	Cnot6l	231464	NM_178854	1	9	2073	2065	0.0055
mmu-miR-181a-5p	MIMAT0000210	Cntln	338349	NM_175275	1	9	4538	4530	0.0045
mmu-miR-181a-5p	MIMAT0000210	Cntn1	12805	NM_001159647	1	8	4406	4399	0.0356
mmu-miR-181a-5p	MIMAT0000210	Cntn1	12805	NM_001159648	1	8	4260	4253	0.0356
mmu-miR-181a-5p	MIMAT0000210	Cntn1	12805	NM_007727	1	8	4309	4302	0.0356
mmu-miR-181a-5p	MIMAT0000210	Cntnap3	238680	NM_001081129	1	9	4601	4593	0.0036
mmu-miR-181a-5p	MIMAT0000210	Col16a1	107581	NM_028266	1	8	5103	5096	0.0031
mmu-miR-181a-5p	MIMAT0000210	Col5a1	12831	NM_015734	1	8	7239	7232	0.0376
mmu-miR-181a-5p	MIMAT0000210	Col5a2	12832	NM_007737	1	8	5685	5678	0.0264
mmu-miR-181a-5p	MIMAT0000210	Col6a5	665033	NM_001167923	1	8	9168	9161	0.0189
mmu-miR-181a-5p	MIMAT0000210	Cops2	12848	NM_009939	1	8	2300	2293	0.0284
mmu-miR-181a-5p	MIMAT0000210	Coro1c	23790	NM_011779	1	9	2624	2616	0.0073
mmu-miR-181a-5p	MIMAT0000210	Coro2a	107684	NM_001164804	1	9	3636	3628	0.0084
mmu-miR-181a-5p	MIMAT0000210	Coro2a	107684	NM_178893	1	9	3861	3853	0.0084
mmu-miR-181a-5p	MIMAT0000210	Cpa6	329093	NM_177834	1	7	1764	1758	0.0239
mmu-miR-181a-5p	MIMAT0000210	Cpd	12874	NM_007754	1	9	5575	5567	0.0188
mmu-miR-181a-5p	MIMAT0000210	Cpt1b	12895	NM_009948	1	7	2779	2773	0.0295
mmu-miR-181a-5p	MIMAT0000210	Crebl2	232430	NM_177687	1	9	2046	2038	0.0073
mmu-miR-181a-5p	MIMAT0000210	Crhbp	12919	NM_198408	1	7	1680	1674	0.0346
mmu-miR-181a-5p	MIMAT0000210	Crk	12928	NM_133656	1	10	5156	5147	0.0047
mmu-miR-181a-5p	MIMAT0000210	Crot	74114	NM_023733	1	7	2072	2066	0.0479
mmu-miR-181a-5p	MIMAT0000210	Cry2	12953	NM_009963	1	8	2013	2006	0.0329
mmu-miR-181a-5p	MIMAT0000210	Csmd3	239420	NM_001081391	1	9	12347	12339	0.0069
mmu-miR-181a-5p	MIMAT0000210	Csnk1g2	103236	NM_001159591	1	7	2241	2235	0.0415
mmu-miR-181a-5p	MIMAT0000210	Csnk1g2	103236	NM_134002	1	7	2418	2412	0.0415
mmu-miR-181a-5p	MIMAT0000210	Csrp3	13009	NM_001198841	1	7	823	817	0.0223
mmu-miR-181a-5p	MIMAT0000210	Csrp3	13009	NM_013808	1	7	845	839	0.0223
mmu-miR-181a-5p	MIMAT0000210	Ctbp1	13016	NM_001198861	1	7	1961	1955	0.0472
mmu-miR-181a-5p	MIMAT0000210	Ctbp1	13016	NM_001198859	1	7	1765	1759	0.0472
mmu-miR-181a-5p	MIMAT0000210	Ctbp1	13016	NM_013502	1	7	1768	1762	0.0472
mmu-miR-181a-5p	MIMAT0000210	Ctbp1	13016	NM_001198860	1	7	1958	1952	0.0472
mmu-miR-181a-5p	MIMAT0000210	Ctcf	13018	NM_181322	1	8	3379	3372	0.0201
mmu-miR-181a-5p	MIMAT0000210	Ctdspl	69274	NM_133710	1	9	1596	1588	0.0131
mmu-miR-181a-5p	MIMAT0000210	Ctdspl2	329506	NM_212450	1	8	4262	4255	0.0441
mmu-miR-181a-5p	MIMAT0000210	Ctxn3	629147	NM_001134697	1	8	912	905	0.0118
mmu-miR-181a-5p	MIMAT0000210	Cul5	75717	NM_001161618	1	8	3491	3484	0.0481
mmu-miR-181a-5p	MIMAT0000210	Cul5	75717	NM_027807	1	8	3572	3565	0.0481
mmu-miR-181a-5p	MIMAT0000210	Cutal	77996	NM_030021	1	9	656	648	0.0067
mmu-miR-181a-5p	MIMAT0000210	Cxcl15	20309	NM_011339	1	8	705	698	0.0239
mmu-miR-181a-5p	MIMAT0000210	Cyp11b1	110115	NM_001033229	1	9	1841	1833	0.0033
mmu-miR-181a-5p	MIMAT0000210	Cyp1b1	13078	NM_009994	1	8	3972	3965	0.0468
mmu-miR-181a-5p	MIMAT0000210	Cyp2c39	13098	NM_010003	1	9	1830	1822	0.0013
mmu-miR-181a-5p	MIMAT0000210	Cyp46a1	13116	NM_010010	1	8	1983	1976	0.0088
mmu-miR-181a-5p	MIMAT0000210	Cyp4b1	13120	NM_007823	1	8	1735	1728	0.0048
mmu-miR-181a-5p	MIMAT0000210	Cyp7a1	13122	NM_007824	1	8	2903	2896	0.0389
mmu-miR-181a-5p	MIMAT0000210	Cyr61	16007	NM_010516	1	9	1884	1876	0.0026
mmu-miR-181a-5p	MIMAT0000210	D10Wsu52e	28088	NM_145422	1	9	1979	1971	0.0014
mmu-miR-181a-5p	MIMAT0000210	D630003M21Rik	228846	NM_001131021	1	10	4067	4058	0.001
mmu-miR-181a-5p	MIMAT0000210	Dalrd3	67789	NM_026378	1	7	1658	1652	0.0061
mmu-miR-181a-5p	MIMAT0000210	Dcun1d1	114893	NM_033623	1	9	1773	1765	0.0133
mmu-miR-181a-5p	MIMAT0000210	Dcun1d1	114893	NM_001205362	1	9	1786	1778	0.0133
mmu-miR-181a-5p	MIMAT0000210	Dcun1d1	114893	NM_001205361	1	9	1826	1818	0.0133
mmu-miR-181a-5p	MIMAT0000210	Ddit4l	73284	NM_030143	1	10	1685	1676	0.0018
mmu-miR-181a-5p	MIMAT0000210	Ddx25	30959	NM_013932	1	7	1582	1576	0.0091
mmu-miR-181a-5p	MIMAT0000210	Ddx3x	13205	NM_010028	1	9	4004	3996	0.0095
mmu-miR-181a-5p	MIMAT0000210	Dennd1b	329260	NM_181347	1	9	7764	7756	0.0217
mmu-miR-181a-5p	MIMAT0000210	Dennd1b	329260	NM_001166501	1	9	7898	7890	0.0217
mmu-miR-181a-5p	MIMAT0000210	Dennd4a	102442	NM_001162917	1	9	8408	8400	0.0098
mmu-miR-181a-5p	MIMAT0000210	Dennd4c	329877	NM_184088	1	9	7622	7614	0.0065
mmu-miR-181a-5p	MIMAT0000210	Dennd6b	69440	NM_027081	1	8	2869	2862	0.043
mmu-miR-181a-5p	MIMAT0000210	Dgkb	217480	NM_178681	1	8	5318	5311	0.0407
mmu-miR-181a-5p	MIMAT0000210	Dhx57	106794	NM_198942	1	8	4712	4705	0.0076
mmu-miR-181a-5p	MIMAT0000210	Dhx57	106794	NM_001163759	1	8	4871	4864	0.0076
mmu-miR-181a-5p	MIMAT0000210	Dicer1	192119	NM_148948	1	9	7784	7776	0.0146
mmu-miR-181a-5p	MIMAT0000210	Dio3	107585	NM_172119	1	8	1797	1790	0.0145
mmu-miR-181a-5p	MIMAT0000210	Dip2c	208440	NM_001081426	1	10	7824	7815	0.0028
mmu-miR-181a-5p	MIMAT0000210	Dmrt3	240590	NM_177360	1	7	2030	2024	0.0423
mmu-miR-181a-5p	MIMAT0000210	Dmxl1	240283	NM_001081371	1	8	11911	11904	0.0459
mmu-miR-181a-5p	MIMAT0000210	Dnajb5	56323	NM_019874	1	8	2239	2232	0.0181
mmu-miR-181a-5p	MIMAT0000210	Dnajc1	13418	NM_001190817	1	10	5033	5024	0.003
mmu-miR-181a-5p	MIMAT0000210	Dnajc21	78244	NM_030046	1	9	1966	1958	0.0012
mmu-miR-181a-5p	MIMAT0000210	Dnmbp	71972	NM_028029	1	11	5380	5370	0.0003
mmu-miR-181a-5p	MIMAT0000210	Dnmt3a	13435	NM_153743	1	10	8846	8837	0.0064
mmu-miR-181a-5p	MIMAT0000210	Dnmt3a	13435	NM_007872	1	10	9668	9659	0.0064
mmu-miR-181a-5p	MIMAT0000210	Dock10	210293	NM_175291	1	8	7004	6997	0.0096
mmu-miR-181a-5p	MIMAT0000210	Dock2	94176	NM_033374	1	8	5811	5804	0.0131
mmu-miR-181a-5p	MIMAT0000210	Dock7	67299	NM_026082	1	8	6845	6838	0.009
mmu-miR-181a-5p	MIMAT0000210	Dock9	105445	NM_134074	1	8	7662	7655	0.0221
mmu-miR-181a-5p	MIMAT0000210	Dock9	105445	NM_001081039	1	8	7812	7805	0.0221
mmu-miR-181a-5p	MIMAT0000210	Dock9	105445	NM_001128308	1	8	8084	8077	0.0239
mmu-miR-181a-5p	MIMAT0000210	Dock9	105445	NM_001128307	1	8	8123	8116	0.0239
mmu-miR-181a-5p	MIMAT0000210	Dr1	13486	NM_026106	1	8	2706	2699	0.0279
mmu-miR-181a-5p	MIMAT0000210	Drd1a	13488	NM_010076	1	9	3457	3449	0.0064
mmu-miR-181a-5p	MIMAT0000210	Dync1li2	234663	NM_001013380	1	8	3131	3124	0.0436
mmu-miR-181a-5p	MIMAT0000210	Dync2li1	213575	NM_172256	1	8	1282	1275	0.0037
mmu-miR-181a-5p	MIMAT0000210	Dynll2	68097	NM_001168471	1	9	2080	2072	0.0073
mmu-miR-181a-5p	MIMAT0000210	Dynll2	68097	NM_001168472	1	9	2253	2245	0.0073
mmu-miR-181a-5p	MIMAT0000210	Dynll2	68097	NM_026556	1	9	2286	2278	0.0073
mmu-miR-181a-5p	MIMAT0000210	E2f7	52679	NM_178609	1	9	3451	3443	0.0097
mmu-miR-181a-5p	MIMAT0000210	E330034G19Rik	105418	NM_001033214	1	7	1463	1457	0.023
mmu-miR-181a-5p	MIMAT0000210	Edem1	192193	NM_138677	1	9	3655	3647	0.0144
mmu-miR-181a-5p	MIMAT0000210	Edil3	13612	NM_010103	1	9	4452	4444	0.0129
mmu-miR-181a-5p	MIMAT0000210	Edil3	13612	NM_001037987	1	9	4482	4474	0.0129
mmu-miR-181a-5p	MIMAT0000210	Eef1a1	13627	NM_010106	1	7	1660	1654	0.017
mmu-miR-181a-5p	MIMAT0000210	Egflam	268780	NM_178748	1	8	4594	4587	0.023
mmu-miR-181a-5p	MIMAT0000210	Ehbp1l1	114601	NM_053252	1	8	3109	3102	0.0145
mmu-miR-181a-5p	MIMAT0000210	Ehbp1l1	114601	NM_001114597	1	8	5632	5625	0.0145
mmu-miR-181a-5p	MIMAT0000210	Ehbp1l1	114601	NM_001114595	1	8	2764	2757	0.0145
mmu-miR-181a-5p	MIMAT0000210	Ehbp1l1	114601	NM_001114596	1	8	2800	2793	0.0145
mmu-miR-181a-5p	MIMAT0000210	Ehd4	98878	NM_133838	1	8	3249	3242	0.025
mmu-miR-181a-5p	MIMAT0000210	Eif2ak4	27103	NM_013719	1	7	5103	5097	0.011
mmu-miR-181a-5p	MIMAT0000210	Eif2ak4	27103	NM_001177806	1	7	4799	4793	0.011
mmu-miR-181a-5p	MIMAT0000210	Eif2b3	108067	NM_175135	1	10	3390	3381	0.0022
mmu-miR-181a-5p	MIMAT0000210	Eif3j1	78655	NM_144545	1	9	1917	1909	0.0059
mmu-miR-181a-5p	MIMAT0000210	Eif3j2	100042807	NM_001256055	1	9	1924	1916	0.0058
mmu-miR-181a-5p	MIMAT0000210	Eif4a2	13682	NM_001123037	1	9	2009	2001	0.0031
mmu-miR-181a-5p	MIMAT0000210	Eif4a2	13682	NM_013506	1	9	2149	2141	0.0031
mmu-miR-181a-5p	MIMAT0000210	Eif4a2	13682	NM_001123038	1	9	2965	2957	0.0067
mmu-miR-181a-5p	MIMAT0000210	Eif5a2	208691	NM_177586	1	9	4873	4865	0.0166
mmu-miR-181a-5p	MIMAT0000210	Elavl2	15569	NM_001177883	1	9	3022	3014	0.0096
mmu-miR-181a-5p	MIMAT0000210	Elavl2	15569	NM_207686	1	9	2581	2573	0.0096
mmu-miR-181a-5p	MIMAT0000210	Elavl2	15569	NM_010486	1	9	2620	2612	0.0096
mmu-miR-181a-5p	MIMAT0000210	Elavl2	15569	NM_207685	1	9	2729	2721	0.0096
mmu-miR-181a-5p	MIMAT0000210	Elavl4	15572	NM_001163397	1	9	1414	1406	0.0099
mmu-miR-181a-5p	MIMAT0000210	Elavl4	15572	NM_001038698	1	9	1659	1651	0.0099
mmu-miR-181a-5p	MIMAT0000210	Elavl4	15572	NM_001163399	1	9	1703	1695	0.0099
mmu-miR-181a-5p	MIMAT0000210	Elavl4	15572	NM_010488	1	9	1745	1737	0.0099
mmu-miR-181a-5p	MIMAT0000210	Elmo3	234683	NM_172760	1	7	2673	2667	0.0445
mmu-miR-181a-5p	MIMAT0000210	Elmsan1	238317	NM_001163501	1	9	6814	6806	0.0123
mmu-miR-181a-5p	MIMAT0000210	Elmsan1	238317	NM_001163502	1	9	7224	7216	0.0123
mmu-miR-181a-5p	MIMAT0000210	Emc2	66736	NM_025736	1	7	1083	1077	0.0178
mmu-miR-181a-5p	MIMAT0000210	En1	13798	NM_010133	1	9	2259	2251	0.0031
mmu-miR-181a-5p	MIMAT0000210	En2	13799	NM_010134	1	8	3454	3447	0.0261
mmu-miR-181a-5p	MIMAT0000210	Entpd5	12499	NM_007647	1	9	2630	2622	0.013
mmu-miR-181a-5p	MIMAT0000210	Entpd5	12499	NM_001026214	1	9	2703	2695	0.013
mmu-miR-181a-5p	MIMAT0000210	Epb4.1l4b	54357	NM_019427	1	8	1664	1657	0.0208
mmu-miR-181a-5p	MIMAT0000210	Epha4	13838	NM_007936	1	8	4512	4505	0.0493
mmu-miR-181a-5p	MIMAT0000210	Erc1	111173	NM_053204	1	9	4082	4074	0.0183
mmu-miR-181a-5p	MIMAT0000210	Ercc8	71991	NM_028042	1	9	1949	1941	0.0033
mmu-miR-181a-5p	MIMAT0000210	Ergic2	67456	NM_026168	1	8	3021	3014	0.0354
mmu-miR-181a-5p	MIMAT0000210	Erv3	71995	NM_001166206	1	8	1397	1390	0.0324
mmu-miR-181a-5p	MIMAT0000210	Esco1	77805	NM_001081222	1	9	4476	4468	0.0038
mmu-miR-181a-5p	MIMAT0000210	Esrp1	207920	NM_194055	1	8	3247	3240	0.0222
mmu-miR-181a-5p	MIMAT0000210	Etf1	225363	NM_144866	1	8	2452	2445	0.0332
mmu-miR-181a-5p	MIMAT0000210	Etohi1	626848	NM_001177399	1	9	2002	1994	0.007
mmu-miR-181a-5p	MIMAT0000210	Evx1	14028	NM_007966	1	9	2429	2421	0.0049
mmu-miR-181a-5p	MIMAT0000210	Exoc4	20336	NM_009148	1	7	3118	3112	0.0472
mmu-miR-181a-5p	MIMAT0000210	Exoc6b	75914	NM_177077	1	8	2546	2539	0.0433
mmu-miR-181a-5p	MIMAT0000210	F10	14058	NM_007972	1	7	1780	1774	0.0473
mmu-miR-181a-5p	MIMAT0000210	F10	14058	NM_001242368	1	7	1970	1964	0.0473
mmu-miR-181a-5p	MIMAT0000210	F830045P16Rik	228592	NM_177653	1	8	1819	1812	0.0049
mmu-miR-181a-5p	MIMAT0000210	Faf2	76577	NM_178397	1	8	2601	2594	0.0437
mmu-miR-181a-5p	MIMAT0000210	Fam102a	98952	NM_153560	1	8	3372	3365	0.0346
mmu-miR-181a-5p	MIMAT0000210	Fam122a	68034	NM_026520	1	7	1480	1474	0.0432
mmu-miR-181a-5p	MIMAT0000210	Fam133b	68152	NM_001042501	1	8	1557	1550	0.0223
mmu-miR-181a-5p	MIMAT0000210	Fam160a1	229488	NM_172682	1	8	3551	3544	0.0137
mmu-miR-181a-5p	MIMAT0000210	Fam189b	68521	NM_001014995	1	8	3015	3008	0.0086
mmu-miR-181a-5p	MIMAT0000210	Fam195a	68241	NM_026633	1	7	567	561	0.0164
mmu-miR-181a-5p	MIMAT0000210	Fam199x	245622	NM_146261	1	9	6251	6243	0.0258
mmu-miR-181a-5p	MIMAT0000210	Fam210a	108654	NM_153794	1	9	5078	5070	0.0321
mmu-miR-181a-5p	MIMAT0000210	Fam32a	67922	NM_026455	1	8	1184	1177	0.023
mmu-miR-181a-5p	MIMAT0000210	Fam43a	224093	NM_177632	1	8	2912	2905	0.014
mmu-miR-181a-5p	MIMAT0000210	Fam46d	213449	NM_001271008	1	8	2656	2649	0.0215
mmu-miR-181a-5p	MIMAT0000210	Fam46d	213449	NM_001163104	1	8	2760	2753	0.0215
mmu-miR-181a-5p	MIMAT0000210	Fam81a	76886	NM_029784	1	8	2258	2251	0.022
mmu-miR-181a-5p	MIMAT0000210	Fanci	208836	NM_145946	1	8	4465	4458	0.0084
mmu-miR-181a-5p	MIMAT0000210	Fasl	14103	NM_001205243	1	8	1722	1715	0.0194
mmu-miR-181a-5p	MIMAT0000210	Fasl	14103	NM_010177	1	8	1768	1761	0.0134
mmu-miR-181a-5p	MIMAT0000210	Fbxl18	231863	NM_001033312	1	7	2712	2706	0.0345
mmu-miR-181a-5p	MIMAT0000210	Fbxl3	50789	NM_015822	1	10	2130	2121	0.0025
mmu-miR-181a-5p	MIMAT0000210	Fbxo33	70611	NM_001033156	1	8	3369	3362	0.0264
mmu-miR-181a-5p	MIMAT0000210	Fcho2	218503	NM_172591	1	9	3209	3201	0.009
mmu-miR-181a-5p	MIMAT0000210	Fgf7	14178	NM_008008	1	8	1588	1581	0.0245
mmu-miR-181a-5p	MIMAT0000210	Fitm2	228859	NM_173397	1	7	1348	1342	0.0477
mmu-miR-181a-5p	MIMAT0000210	Fkbp4	14228	NM_010219	1	7	1754	1748	0.04
mmu-miR-181a-5p	MIMAT0000210	Fmnl2	71409	NM_172409	1	8	4991	4984	0.0348
mmu-miR-181a-5p	MIMAT0000210	Fndc3b	72007	NM_173182	1	9	6603	6595	0.0119
mmu-miR-181a-5p	MIMAT0000210	Fndc5	384061	NM_027402	1	8	2370	2363	0.0311
mmu-miR-181a-5p	MIMAT0000210	Fnip2	329679	NM_001162999	1	9	6361	6353	0.014
mmu-miR-181a-5p	MIMAT0000210	Fos	14281	NM_010234	1	8	1889	1882	0.0125
mmu-miR-181a-5p	MIMAT0000210	Foxb1	64290	NM_022378	1	8	2312	2305	0.0235
mmu-miR-181a-5p	MIMAT0000210	Foxj3	230700	NM_172699	1	8	4079	4072	0.0415
mmu-miR-181a-5p	MIMAT0000210	Frmd7	385354	NM_001190332	1	8	2133	2126	0.0379
mmu-miR-181a-5p	MIMAT0000210	Fsd1l	319636	NM_001195284	1	9	4572	4564	0.0221
mmu-miR-181a-5p	MIMAT0000210	Ftsj1	54632	NM_133991	1	8	1599	1592	0.0327
mmu-miR-181a-5p	MIMAT0000210	Fut10	171167	NM_134161	1	9	2200	2192	0.0049
mmu-miR-181a-5p	MIMAT0000210	Fut4	14345	NM_010242	1	8	3288	3281	0.0335
mmu-miR-181a-5p	MIMAT0000210	Gabra1	14394	NM_010250	1	8	4528	4521	0.0382
mmu-miR-181a-5p	MIMAT0000210	Galnt9	231605	NM_001122639	1	8	885	878	0.011
mmu-miR-181a-5p	MIMAT0000210	Galnt9	231605	NM_198306	1	8	2225	2218	0.011
mmu-miR-181a-5p	MIMAT0000210	Gbp11	634650	NM_001039647	1	7	2339	2333	0.0465
mmu-miR-181a-5p	MIMAT0000210	Gcm1	14531	NM_008103	1	7	1598	1592	0.0321
mmu-miR-181a-5p	MIMAT0000210	Gcnt2	14538	NM_008105	1	8	3963	3956	0.0384
mmu-miR-181a-5p	MIMAT0000210	Gcnt2	14538	NM_133219	1	8	3603	3596	0.0384
mmu-miR-181a-5p	MIMAT0000210	Gcnt2	14538	NM_023887	1	8	3941	3934	0.0384
mmu-miR-181a-5p	MIMAT0000210	Gdpgp1	269952	NM_178752	1	8	1642	1635	0.0306
mmu-miR-181a-5p	MIMAT0000210	Gfpt1	14583	NM_013528	1	9	6024	6016	0.0153
mmu-miR-181a-5p	MIMAT0000210	Gid4	66771	NM_025757	1	8	1303	1296	0.0487
mmu-miR-181a-5p	MIMAT0000210	Glod4	67201	NM_026029	1	9	1720	1712	0.006
mmu-miR-181a-5p	MIMAT0000210	Gm10057	625650	NM_001243016	1	7	905	899	0.0073
mmu-miR-181a-5p	MIMAT0000210	Gm10257	544973	XM_003084942	1	8	492	485	0.0054
mmu-miR-181a-5p	MIMAT0000210	Gm10257	544973	XM_003945939	1	8	606	599	0.0069
mmu-miR-181a-5p	MIMAT0000210	Gm12657	667250	NM_001081019	1	8	536	529	0.008
mmu-miR-181a-5p	MIMAT0000210	Gm13119	433779	NM_001034101	1	8	2047	2040	0.0088
mmu-miR-181a-5p	MIMAT0000210	Gm13139	666532	NM_001083918	1	7	2276	2270	0.0444
mmu-miR-181a-5p	MIMAT0000210	Gm14308	100043381	NM_001099349	1	9	2122	2114	0.011
mmu-miR-181a-5p	MIMAT0000210	Gm14322	626802	NM_001243903	1	9	1706	1698	0.0107
mmu-miR-181a-5p	MIMAT0000210	Gm14325	329575	NM_001024849	1	9	2068	2060	0.0107
mmu-miR-181a-5p	MIMAT0000210	Gm14326	665211	NM_001190302	1	9	2289	2281	0.0036
mmu-miR-181a-5p	MIMAT0000210	Gm14391	665001	NM_001099308	1	9	2353	2345	0.0024
mmu-miR-181a-5p	MIMAT0000210	Gm14420	628308	NM_001177568	1	9	2511	2503	0.0113
mmu-miR-181a-5p	MIMAT0000210	Gm14430	627914	NM_001100415	1	9	2122	2114	0.011
mmu-miR-181a-5p	MIMAT0000210	Gm14431	100303732	NM_001177406	1	9	2264	2256	0.0079
mmu-miR-181a-5p	MIMAT0000210	Gm14431	100303732	NM_001177404	1	9	489	481	0.0051
mmu-miR-181a-5p	MIMAT0000210	Gm14434	668039	NM_001101804	1	9	2122	2114	0.011
mmu-miR-181a-5p	MIMAT0000210	Gm14440	100503353	NM_001199308	1	9	2963	2955	0.0118
mmu-miR-181a-5p	MIMAT0000210	Gm14446	667373	NM_001110517	1	7	2216	2210	0.045
mmu-miR-181a-5p	MIMAT0000210	Gm14446	667373	NM_001101605	1	7	2135	2129	0.045
mmu-miR-181a-5p	MIMAT0000210	Gm15140	625713	NM_001243017	1	7	903	897	0.0073
mmu-miR-181a-5p	MIMAT0000210	Gm15143	100040020	XM_003688980	1	7	741	735	0.0071
mmu-miR-181a-5p	MIMAT0000210	Gm15143	100040020	XM_003689467	1	7	741	735	0.0071
mmu-miR-181a-5p	MIMAT0000210	Gm15143	100040020	XM_001473955	1	7	753	747	0.0071
mmu-miR-181a-5p	MIMAT0000210	Gm15143	100040020	XM_003689466	1	7	753	747	0.0071
mmu-miR-181a-5p	MIMAT0000210	Gm1564	268491	NM_001127576	1	10	4517	4508	0.0014
mmu-miR-181a-5p	MIMAT0000210	Gm16223	433882	XM_003946167	1	8	2392	2385	0.0326
mmu-miR-181a-5p	MIMAT0000210	Gm16223	433882	XM_003945391	1	8	2392	2385	0.0326
mmu-miR-181a-5p	MIMAT0000210	Gm16445	635580	NM_001243032	1	7	892	886	0.0072
mmu-miR-181a-5p	MIMAT0000210	Gm21949	100505386	NM_001113419	1	8	2263	2256	0.0095
mmu-miR-181a-5p	MIMAT0000210	Gm2373	100039691	XM_003946388	1	8	1464	1457	0.019
mmu-miR-181a-5p	MIMAT0000210	Gm3896	100042545	XM_003946289	1	7	657	651	0.0263
mmu-miR-181a-5p	MIMAT0000210	Gm3896	100042545	XM_003945448	1	7	657	651	0.0263
mmu-miR-181a-5p	MIMAT0000210	Gm4701	100043871	XM_003085153	1	7	885	879	0.0128
mmu-miR-181a-5p	MIMAT0000210	Gm4701	100043871	XM_003086086	1	7	885	879	0.0128
mmu-miR-181a-5p	MIMAT0000210	Gm4724	100043915	NM_001256480	1	9	2122	2114	0.011
mmu-miR-181a-5p	MIMAT0000210	Gm4791	215467	NM_001243258	1	8	1001	994	0.0079
mmu-miR-181a-5p	MIMAT0000210	Gm4858	229571	NM_001034860	1	8	1313	1306	0.0132
mmu-miR-181a-5p	MIMAT0000210	Gm4858	229571	NM_001177694	1	8	1488	1481	0.0132
mmu-miR-181a-5p	MIMAT0000210	Gm5079	327749	XM_003945461	1	8	1577	1570	0.0186
mmu-miR-181a-5p	MIMAT0000210	Gm5079	327749	XM_003945853	1	8	1577	1570	0.0186
mmu-miR-181a-5p	MIMAT0000210	Gm5127	331493	NM_001033541	1	7	1211	1205	0.0478
mmu-miR-181a-5p	MIMAT0000210	Gm5646	434879	XM_486805	1	7	741	735	0.0071
mmu-miR-181a-5p	MIMAT0000210	Gm5646	434879	XM_910844	1	7	741	735	0.0071
mmu-miR-181a-5p	MIMAT0000210	Gm5646	434879	XM_003085303	1	7	753	747	0.0071
mmu-miR-181a-5p	MIMAT0000210	Gm5646	434879	XM_003086867	1	7	753	747	0.0071
mmu-miR-181a-5p	MIMAT0000210	Gm6710	626832	NM_001164689	1	9	2346	2338	0.0074
mmu-miR-181a-5p	MIMAT0000210	Gm6958	629242	XM_001479180	1	8	3378	3371	0.0379
mmu-miR-181a-5p	MIMAT0000210	Gm6958	629242	XM_001480210	1	8	3378	3371	0.0379
mmu-miR-181a-5p	MIMAT0000210	Gm7694	665574	NM_001198955	1	8	3650	3643	0.0441
mmu-miR-181a-5p	MIMAT0000210	Gm8898	667962	NM_001177405	1	9	489	481	0.0051
mmu-miR-181a-5p	MIMAT0000210	Gm8898	667962	NM_001177407	1	9	2264	2256	0.0079
mmu-miR-181a-5p	MIMAT0000210	Golm1	105348	NM_027307	1	8	2348	2341	0.0344
mmu-miR-181a-5p	MIMAT0000210	Golm1	105348	NM_001035122	1	8	2212	2205	0.0344
mmu-miR-181a-5p	MIMAT0000210	Gp1bb	14724	NM_010327	1	7	1761	1755	0.0243
mmu-miR-181a-5p	MIMAT0000210	Gp1bb	14724	NM_001001999	1	7	1999	1993	0.0243
mmu-miR-181a-5p	MIMAT0000210	Gpbp1	73274	NM_001122963	1	8	2951	2944	0.0123
mmu-miR-181a-5p	MIMAT0000210	Gpbp1	73274	NM_028487	1	8	3011	3004	0.0123
mmu-miR-181a-5p	MIMAT0000210	Gpc5	103978	NM_175500	1	7	2262	2256	0.045
mmu-miR-181a-5p	MIMAT0000210	Gpcpd1	74182	NM_028802	1	8	3344	3337	0.0222
mmu-miR-181a-5p	MIMAT0000210	Gpcpd1	74182	NM_001042671	1	8	3347	3340	0.0222
mmu-miR-181a-5p	MIMAT0000210	Gpr160	71862	NM_001134386	1	7	1450	1444	0.0242
mmu-miR-181a-5p	MIMAT0000210	Gpr160	71862	NM_027965	1	7	1779	1773	0.0242
mmu-miR-181a-5p	MIMAT0000210	Gpr160	71862	NM_001134385	1	7	1967	1961	0.0242
mmu-miR-181a-5p	MIMAT0000210	Gpr39	71111	NM_027677	1	8	2633	2626	0.0148
mmu-miR-181a-5p	MIMAT0000210	Gprc5b	64297	NM_001195774	1	8	1710	1703	0.0174
mmu-miR-181a-5p	MIMAT0000210	Gprc5b	64297	NM_022420	1	8	3677	3670	0.0465
mmu-miR-181a-5p	MIMAT0000210	Gpsm2	76123	NM_029522	1	8	2661	2654	0.0146
mmu-miR-181a-5p	MIMAT0000210	Gpx8	69590	NM_027127	1	8	1014	1007	0.0057
mmu-miR-181a-5p	MIMAT0000210	Gria2	14800	NM_001039195	1	8	2841	2834	0.0118
mmu-miR-181a-5p	MIMAT0000210	Grik2	14806	NM_001111268	1	8	3402	3395	0.0248
mmu-miR-181a-5p	MIMAT0000210	Grik2	14806	NM_010349	1	8	3489	3482	0.0278
mmu-miR-181a-5p	MIMAT0000210	Grk1	24013	NM_011881	1	9	7105	7097	0.0216
mmu-miR-181a-5p	MIMAT0000210	Grm8	14823	NM_008174	1	7	3667	3661	0.0356
mmu-miR-181a-5p	MIMAT0000210	Grpel1	17713	NM_024478	1	8	1477	1470	0.04
mmu-miR-181a-5p	MIMAT0000210	Gsdmc	83492	NM_031378	1	7	2103	2097	0.0422
mmu-miR-181a-5p	MIMAT0000210	Gsdmc2	331063	NM_177912	1	7	1907	1901	0.0319
mmu-miR-181a-5p	MIMAT0000210	Gsdmc2	331063	NM_001168274	1	7	2142	2136	0.0319
mmu-miR-181a-5p	MIMAT0000210	Gsdmc3	270328	NM_183194	1	7	1980	1974	0.0328
mmu-miR-181a-5p	MIMAT0000210	Gsdmc4	74548	NM_028992	1	7	1932	1926	0.0324
mmu-miR-181a-5p	MIMAT0000210	Gskip	66787	NM_178613	1	8	1347	1340	0.0339
mmu-miR-181a-5p	MIMAT0000210	Gtf2ird2	114674	NM_053266	1	7	3215	3209	0.026
mmu-miR-181a-5p	MIMAT0000210	Gulo	268756	NM_178747	1	7	2208	2202	0.0464
mmu-miR-181a-5p	MIMAT0000210	Gzmb	14939	NM_013542	1	7	1148	1142	0.0338
mmu-miR-181a-5p	MIMAT0000210	H3f3a	15078	NM_008210	1	8	648	641	0.0077
mmu-miR-181a-5p	MIMAT0000210	Hand2	15111	NM_010402	1	8	1872	1865	0.01
mmu-miR-181a-5p	MIMAT0000210	Haus2	66296	NM_025475	1	9	1465	1457	0.0063
mmu-miR-181a-5p	MIMAT0000210	Hdac9	79221	NM_024124	1	8	3054	3047	0.0354
mmu-miR-181a-5p	MIMAT0000210	Hebp2	56016	NM_019487	1	9	1872	1864	0.0038
mmu-miR-181a-5p	MIMAT0000210	Hephl1	244698	NM_001164797	1	9	4153	4145	0.0068
mmu-miR-181a-5p	MIMAT0000210	Herc6	67138	NM_025992	1	9	3275	3267	0.0084
mmu-miR-181a-5p	MIMAT0000210	Herpud1	64209	NM_022331	1	7	1677	1671	0.0361
mmu-miR-181a-5p	MIMAT0000210	Hgd	15233	NM_013547	1	7	1636	1630	0.0122
mmu-miR-181a-5p	MIMAT0000210	Hhip	15245	NM_020259	1	9	7313	7305	0.0245
mmu-miR-181a-5p	MIMAT0000210	Hmgb2	97165	NM_008252	1	10	1039	1030	0.0018
mmu-miR-181a-5p	MIMAT0000210	Hmgn5	50887	NM_016710	1	9	1826	1818	0.0022
mmu-miR-181a-5p	MIMAT0000210	Hn1l	52009	NM_198937	1	9	639	631	0.0077
mmu-miR-181a-5p	MIMAT0000210	Hnrnpa2b1	53379	NM_182650	1	7	1283	1277	0.0314
mmu-miR-181a-5p	MIMAT0000210	Hnrnpc	15381	NM_001170984	1	9	2037	2029	0.0065
mmu-miR-181a-5p	MIMAT0000210	Hnrnpc	15381	NM_001170983	1	9	2040	2032	0.0065
mmu-miR-181a-5p	MIMAT0000210	Hnrnpc	15381	NM_001170981	1	9	2061	2053	0.0065
mmu-miR-181a-5p	MIMAT0000210	Hnrnpc	15381	NM_016884	1	9	2100	2092	0.0065
mmu-miR-181a-5p	MIMAT0000210	Hnrnpc	15381	NM_001170982	1	9	2035	2027	0.0065
mmu-miR-181a-5p	MIMAT0000210	Hprt	15452	NM_013556	1	8	929	922	0.0083
mmu-miR-181a-5p	MIMAT0000210	Hps5	246694	NM_001167864	1	8	4513	4506	0.0143
mmu-miR-181a-5p	MIMAT0000210	Hps5	246694	NM_001005248	1	8	4588	4581	0.0143
mmu-miR-181a-5p	MIMAT0000210	Hps5	246694	NM_001005247	1	8	4612	4605	0.0143
mmu-miR-181a-5p	MIMAT0000210	Hsf5	327992	NM_001045527	1	8	4149	4142	0.0326
mmu-miR-181a-5p	MIMAT0000210	Hykk	235386	NM_177351	1	9	4596	4588	0.0129
mmu-miR-181a-5p	MIMAT0000210	I830127L07Rik	546643	XM_001477102	1	7	610	604	0.0222
mmu-miR-181a-5p	MIMAT0000210	I830127L07Rik	546643	XM_909906	1	7	610	604	0.0222
mmu-miR-181a-5p	MIMAT0000210	Iars2	381314	NM_198653	1	7	3469	3463	0.0233
mmu-miR-181a-5p	MIMAT0000210	Ibtk	108837	NM_001081282	1	9	5441	5433	0.004
mmu-miR-181a-5p	MIMAT0000210	Id2	15902	NM_010496	1	9	1140	1132	0.0031
mmu-miR-181a-5p	MIMAT0000210	Ids	15931	NM_010498	1	8	4328	4321	0.0469
mmu-miR-181a-5p	MIMAT0000210	Ifit2	15958	NM_008332	1	8	2264	2257	0.0309
mmu-miR-181a-5p	MIMAT0000210	Igfl3	232925	NM_001003393	1	8	496	489	0.0018
mmu-miR-181a-5p	MIMAT0000210	Ihh	16147	NM_010544	1	7	2405	2399	0.0471
mmu-miR-181a-5p	MIMAT0000210	Ikzf5	67143	NM_175115	1	8	3399	3392	0.0453
mmu-miR-181a-5p	MIMAT0000210	Il10ra	16154	NM_008348	1	8	2749	2742	0.0255
mmu-miR-181a-5p	MIMAT0000210	Il1a	16175	NM_010554	1	10	1434	1425	0.001
mmu-miR-181a-5p	MIMAT0000210	Il1rap	16180	NM_008364	1	9	3961	3953	0.0102
mmu-miR-181a-5p	MIMAT0000210	Il21	60505	NM_021782	1	9	3016	3008	0.0098
mmu-miR-181a-5p	MIMAT0000210	Il3	16187	NM_010556	1	8	563	556	0.0049
mmu-miR-181a-5p	MIMAT0000210	Il6	16193	NM_031168	1	8	785	778	0.0064
mmu-miR-181a-5p	MIMAT0000210	Imp3	102462	NM_133976	1	7	768	762	0.0213
mmu-miR-181a-5p	MIMAT0000210	Ing2	69260	NM_023503	1	8	2695	2688	0.0224
mmu-miR-181a-5p	MIMAT0000210	Insm2	56856	NM_020287	1	8	2811	2804	0.0161
mmu-miR-181a-5p	MIMAT0000210	Ints6	18130	NM_008715	1	8	4009	4002	0.0288
mmu-miR-181a-5p	MIMAT0000210	Iqch	78250	NM_030068	1	7	3194	3188	0.013
mmu-miR-181a-5p	MIMAT0000210	Isca1	69046	NM_026921	1	8	1816	1809	0.0217
mmu-miR-181a-5p	MIMAT0000210	Isoc1	66307	NM_025478	1	8	1596	1589	0.025
mmu-miR-181a-5p	MIMAT0000210	Itch	16396	NM_001243712	1	8	5244	5237	0.0358
mmu-miR-181a-5p	MIMAT0000210	Itch	16396	NM_008395	1	8	5042	5035	0.0358
mmu-miR-181a-5p	MIMAT0000210	Itga2	16398	NM_008396	1	8	4200	4193	0.009
mmu-miR-181a-5p	MIMAT0000210	Itgam	16409	NM_008401	1	8	4504	4497	0.0169
mmu-miR-181a-5p	MIMAT0000210	Itgam	16409	NM_001082960	1	8	4507	4500	0.0169
mmu-miR-181a-5p	MIMAT0000210	Jakmip3	74004	NM_028708	1	8	4852	4845	0.0487
mmu-miR-181a-5p	MIMAT0000210	Jdp2	81703	NM_001205053	1	8	1200	1193	0.0139
mmu-miR-181a-5p	MIMAT0000210	Jdp2	81703	NM_001205052	1	8	1208	1201	0.0139
mmu-miR-181a-5p	MIMAT0000210	Jdp2	81703	NM_030887	1	8	1284	1277	0.0142
mmu-miR-181a-5p	MIMAT0000210	Jrkl	77532	NM_001033181	1	9	2804	2796	0.0049
mmu-miR-181a-5p	MIMAT0000210	Katnbl1	72425	NM_024254	1	8	1859	1852	0.0274
mmu-miR-181a-5p	MIMAT0000210	Kcna4	16492	NM_021275	1	8	4029	4022	0.0244
mmu-miR-181a-5p	MIMAT0000210	Kcna5	16493	NM_145983	1	7	2849	2843	0.0495
mmu-miR-181a-5p	MIMAT0000210	Kcnj6	16522	NM_001025584	1	8	2248	2241	0.0089
mmu-miR-181a-5p	MIMAT0000210	Kcnma1	16531	NM_001253377	1	8	3745	3738	0.02
mmu-miR-181a-5p	MIMAT0000210	Kcnma1	16531	NM_001253361	1	8	3940	3933	0.02
mmu-miR-181a-5p	MIMAT0000210	Kcnma1	16531	NM_001253373	1	8	3763	3756	0.02
mmu-miR-181a-5p	MIMAT0000210	Kcnma1	16531	NM_001253375	1	8	5347	5340	0.036
mmu-miR-181a-5p	MIMAT0000210	Kcnma1	16531	NM_001253371	1	8	3832	3825	0.02
mmu-miR-181a-5p	MIMAT0000210	Kcnma1	16531	NM_001253376	1	8	5347	5340	0.036
mmu-miR-181a-5p	MIMAT0000210	Kcnma1	16531	NM_001253372	1	8	3832	3825	0.02
mmu-miR-181a-5p	MIMAT0000210	Kcnma1	16531	NM_001253370	1	8	5434	5427	0.036
mmu-miR-181a-5p	MIMAT0000210	Kcnma1	16531	NM_001253369	1	8	3838	3831	0.02
mmu-miR-181a-5p	MIMAT0000210	Kcnma1	16531	NM_001253368	1	8	5446	5439	0.036
mmu-miR-181a-5p	MIMAT0000210	Kcnma1	16531	NM_010610	1	8	3919	3912	0.02
mmu-miR-181a-5p	MIMAT0000210	Kcnma1	16531	NM_001253364	1	8	5521	5514	0.036
mmu-miR-181a-5p	MIMAT0000210	Kcnma1	16531	NM_001253363	1	8	3928	3921	0.02
mmu-miR-181a-5p	MIMAT0000210	Kcnma1	16531	NM_001253378	1	8	3742	3735	0.02
mmu-miR-181a-5p	MIMAT0000210	Kcnma1	16531	NM_001253362	1	8	3931	3924	0.02
mmu-miR-181a-5p	MIMAT0000210	Kcnmb1	16533	NM_031169	1	8	3303	3296	0.0487
mmu-miR-181a-5p	MIMAT0000210	Khsrp	16549	NM_010613	1	8	2899	2892	0.0248
mmu-miR-181a-5p	MIMAT0000210	Kifc2	16581	NM_010630	1	7	2587	2581	0.044
mmu-miR-181a-5p	MIMAT0000210	Kl	16591	NM_013823	1	8	3726	3719	0.0296
mmu-miR-181a-5p	MIMAT0000210	Klf2	16598	NM_008452	1	7	1285	1279	0.0439
mmu-miR-181a-5p	MIMAT0000210	Klf6	23849	NM_011803	1	9	1518	1510	0.0118
mmu-miR-181a-5p	MIMAT0000210	Klhl5	71778	NM_175174	1	8	3242	3235	0.0171
mmu-miR-181a-5p	MIMAT0000210	Klra17	170733	NM_133203	1	7	1018	1012	0.0141
mmu-miR-181a-5p	MIMAT0000210	Klra18	93970	NM_053153	1	7	1092	1086	0.0183
mmu-miR-181a-5p	MIMAT0000210	Klra20	93967	NM_053150	1	8	861	854	0.0046
mmu-miR-181a-5p	MIMAT0000210	Klra22	93969	NM_053152	1	7	1088	1082	0.018
mmu-miR-181a-5p	MIMAT0000210	Klra7	16638	NM_014194	1	7	933	927	0.0122
mmu-miR-181a-5p	MIMAT0000210	Klrd1	16643	NM_010654	1	7	664	658	0.0185
mmu-miR-181a-5p	MIMAT0000210	Krit1	79264	NM_001170552	1	9	4949	4941	0.0135
mmu-miR-181a-5p	MIMAT0000210	Krit1	79264	NM_030675	1	9	5020	5012	0.0135
mmu-miR-181a-5p	MIMAT0000210	Krtap19-1	170657	NM_130876	1	7	403	397	0.0131
mmu-miR-181a-5p	MIMAT0000210	Krtap20-2	622935	NM_001163615	1	7	263	257	0.018
mmu-miR-181a-5p	MIMAT0000210	Lamc1	226519	NM_010683	1	8	5717	5710	0.0382
mmu-miR-181a-5p	MIMAT0000210	Lancl3	236285	NM_173414	1	8	2471	2464	0.036
mmu-miR-181a-5p	MIMAT0000210	Lap3	66988	NM_024434	1	8	1743	1736	0.0094
mmu-miR-181a-5p	MIMAT0000210	Layn	244864	NM_001033534	1	7	1785	1779	0.031
mmu-miR-181a-5p	MIMAT0000210	Lcorl	209707	NM_001163073	1	9	4381	4373	0.0118
mmu-miR-181a-5p	MIMAT0000210	Lcorl	209707	NM_172153	1	9	4394	4386	0.0118
mmu-miR-181a-5p	MIMAT0000210	Leap2	259301	NM_153069	1	7	424	418	0.0141
mmu-miR-181a-5p	MIMAT0000210	Lhfpl1	237091	NM_178358	1	7	1712	1706	0.05
mmu-miR-181a-5p	MIMAT0000210	Lhx6	16874	NM_008500	1	8	2229	2222	0.0318
mmu-miR-181a-5p	MIMAT0000210	Lhx6	16874	NM_001083127	1	8	1935	1928	0.0309
mmu-miR-181a-5p	MIMAT0000210	Lhx6	16874	NM_001083126	1	8	2039	2032	0.0318
mmu-miR-181a-5p	MIMAT0000210	Lhx6	16874	NM_001083125	1	8	2125	2118	0.0309
mmu-miR-181a-5p	MIMAT0000210	Lhx9	16876	NM_010714	1	9	1267	1259	0.0131
mmu-miR-181a-5p	MIMAT0000210	Lhx9	16876	NM_001025565	1	9	1640	1632	0.0131
mmu-miR-181a-5p	MIMAT0000210	Lipk	240633	NM_172837	1	8	1458	1451	0.0135
mmu-miR-181a-5p	MIMAT0000210	Lipk	240633	NM_001205349	1	8	1473	1466	0.0135
mmu-miR-181a-5p	MIMAT0000210	Llph	66225	NM_025431	1	7	761	755	0.0417
mmu-miR-181a-5p	MIMAT0000210	Lmna	16905	NM_019390	1	7	1526	1520	0.0056
mmu-miR-181a-5p	MIMAT0000210	Lmna	16905	NM_001111102	1	7	2055	2049	0.0068
mmu-miR-181a-5p	MIMAT0000210	Lmo1	109594	NM_057173	1	8	1066	1059	0.0057
mmu-miR-181a-5p	MIMAT0000210	Lmo3	109593	NM_207222	1	10	834	825	0.0014
mmu-miR-181a-5p	MIMAT0000210	LOC100046628	100046628	XM_001476529	1	7	1213	1207	0.0186
mmu-miR-181a-5p	MIMAT0000210	LOC100862515	100862515	XM_003689370	1	9	4957	4949	0.0059
mmu-miR-181a-5p	MIMAT0000210	LOC101055714	101055714	XM_003945910	1	10	944	935	0.0015
mmu-miR-181a-5p	MIMAT0000210	LOC101055714	101055714	XM_003945643	1	10	959	950	0.0015
mmu-miR-181a-5p	MIMAT0000210	LOC101055883	101055883	XM_003945548	1	7	1070	1064	0.0392
mmu-miR-181a-5p	MIMAT0000210	LOC101055883	101055883	XM_003945963	1	7	1070	1064	0.0392
mmu-miR-181a-5p	MIMAT0000210	LOC101055940	101055940	XM_003945553	1	9	3061	3053	0.0075
mmu-miR-181a-5p	MIMAT0000210	LOC101056204	101056204	XM_003945413	1	7	456	450	0.019
mmu-miR-181a-5p	MIMAT0000210	LOC101056364	101056364	XM_003945972	1	9	3050	3042	0.0074
mmu-miR-181a-5p	MIMAT0000210	LOC101056497	101056497	XM_003945923	1	7	912	906	0.0443
mmu-miR-181a-5p	MIMAT0000210	LOC101056512	101056512	XM_003945933	1	7	434	428	0.0278
mmu-miR-181a-5p	MIMAT0000210	LOC101056619	101056619	XM_003946292	1	7	1660	1654	0.0184
mmu-miR-181a-5p	MIMAT0000210	LOC101056619	101056619	XM_003946295	1	7	1264	1258	0.0171
mmu-miR-181a-5p	MIMAT0000210	LOC101056619	101056619	XM_003946297	1	7	1685	1679	0.0171
mmu-miR-181a-5p	MIMAT0000210	LOC101056619	101056619	XM_003946303	1	7	1427	1421	0.0171
mmu-miR-181a-5p	MIMAT0000210	LOC101056619	101056619	XM_003946293	1	7	1660	1654	0.0187
mmu-miR-181a-5p	MIMAT0000210	LOC101056619	101056619	XM_003946294	1	7	1519	1513	0.0171
mmu-miR-181a-5p	MIMAT0000210	LOC101056619	101056619	XM_003946300	1	7	1705	1699	0.0171
mmu-miR-181a-5p	MIMAT0000210	LOC101056619	101056619	XM_003946301	1	7	1584	1578	0.0171
mmu-miR-181a-5p	MIMAT0000210	LOC101056619	101056619	XM_003946296	1	7	2451	2445	0.0171
mmu-miR-181a-5p	MIMAT0000210	LOC101056619	101056619	XM_003946299	1	7	1586	1580	0.0171
mmu-miR-181a-5p	MIMAT0000210	LOC101056619	101056619	XM_003946302	1	7	1611	1605	0.0171
mmu-miR-181a-5p	MIMAT0000210	LOC101056619	101056619	XM_003946298	1	7	1652	1646	0.0171
mmu-miR-181a-5p	MIMAT0000210	LOC101056638	101056638	XM_003946112	1	8	622	615	0.0193
mmu-miR-181a-5p	MIMAT0000210	LOC101056659	101056659	XM_003946413	1	8	505	498	0.0015
mmu-miR-181a-5p	MIMAT0000210	LOC639931	639931	XM_916567	1	7	716	710	0.0244
mmu-miR-181a-5p	MIMAT0000210	LOC676710	676710	XM_003946217	1	8	2400	2393	0.0141
mmu-miR-181a-5p	MIMAT0000210	Lpar6	67168	NM_175116	1	7	2461	2455	0.0432
mmu-miR-181a-5p	MIMAT0000210	Lrp11	237253	NM_172784	1	8	3170	3163	0.0262
mmu-miR-181a-5p	MIMAT0000210	Lrrc39	109245	NM_027321	1	8	2547	2540	0.0319
mmu-miR-181a-5p	MIMAT0000210	Lrrc8e	72267	NM_028175	1	9	3820	3812	0.005
mmu-miR-181a-5p	MIMAT0000210	Lrrcc1	71710	NM_001163580	1	8	5382	5375	0.0367
mmu-miR-181a-5p	MIMAT0000210	Lrrcc1	71710	NM_001163579	1	8	5430	5423	0.0367
mmu-miR-181a-5p	MIMAT0000210	Lrrfip1	16978	NM_001111312	1	7	1716	1710	0.0447
mmu-miR-181a-5p	MIMAT0000210	Lrrfip1	16978	NM_008515	1	7	2459	2453	0.0447
mmu-miR-181a-5p	MIMAT0000210	Lrrfip1	16978	NM_001111311	1	9	2512	2504	0.0048
mmu-miR-181a-5p	MIMAT0000210	Lsmem1	380755	NM_001033437	1	9	815	807	0.0027
mmu-miR-181a-5p	MIMAT0000210	Lyrm9	66274	NM_001076681	1	10	1205	1196	0.0045
mmu-miR-181a-5p	MIMAT0000210	Lztr1	66863	NM_025808	1	8	2922	2915	0.0082
mmu-miR-181a-5p	MIMAT0000210	Magea5	17141	NM_020018	1	8	1527	1520	0.0056
mmu-miR-181a-5p	MIMAT0000210	Magea8	17144	NM_020020	1	8	1611	1604	0.0057
mmu-miR-181a-5p	MIMAT0000210	Magel2	27385	NM_013779	1	7	4578	4572	0.0263
mmu-miR-181a-5p	MIMAT0000210	Mamstr	74490	NM_172418	1	7	2081	2075	0.0464
mmu-miR-181a-5p	MIMAT0000210	Manba	110173	NM_027288	1	8	3179	3172	0.0148
mmu-miR-181a-5p	MIMAT0000210	Manea	242362	NM_172865	1	8	3664	3657	0.0471
mmu-miR-181a-5p	MIMAT0000210	Mansc1	67729	NM_026345	1	7	2127	2121	0.0471
mmu-miR-181a-5p	MIMAT0000210	Map3k8	26410	NM_007746	1	8	1576	1569	0.0148
mmu-miR-181a-5p	MIMAT0000210	Map6	17760	NM_001048167	1	9	4379	4371	0.0102
mmu-miR-181a-5p	MIMAT0000210	Mapk1	26413	NM_011949	1	9	5044	5036	0.0143
mmu-miR-181a-5p	MIMAT0000210	Marchf6	223455	NM_172606	1	8	6229	6222	0.049
mmu-miR-181a-5p	MIMAT0000210	Mat2b	108645	NM_134017	1	7	1290	1284	0.0432
mmu-miR-181a-5p	MIMAT0000210	Mat2b	108645	NM_001199274	1	7	1486	1480	0.0432
mmu-miR-181a-5p	MIMAT0000210	Mbtps2	270669	NM_172307	1	8	1931	1924	0.0463
mmu-miR-181a-5p	MIMAT0000210	Mc1r	17199	NM_008559	1	8	3533	3526	0.0344
mmu-miR-181a-5p	MIMAT0000210	Med6	69792	NM_027213	1	8	743	736	0.0043
mmu-miR-181a-5p	MIMAT0000210	Med7	66213	NM_001104557	1	8	972	965	0.0217
mmu-miR-181a-5p	MIMAT0000210	Med7	66213	NM_001104556	1	8	1140	1133	0.0217
mmu-miR-181a-5p	MIMAT0000210	Med7	66213	NM_001104530	1	8	1142	1135	0.0217
mmu-miR-181a-5p	MIMAT0000210	Med7	66213	NM_025426	1	8	1310	1303	0.0217
mmu-miR-181a-5p	MIMAT0000210	Meiob	75178	NM_029197	1	7	1514	1508	0.0151
mmu-miR-181a-5p	MIMAT0000210	Metap1	75624	NM_175224	1	8	2513	2506	0.0208
mmu-miR-181a-5p	MIMAT0000210	Mettl21e	403183	NM_207281	1	8	1183	1176	0.0342
mmu-miR-181a-5p	MIMAT0000210	Mex3b	108797	NM_175366	1	9	2541	2533	0.0052
mmu-miR-181a-5p	MIMAT0000210	Mfap3l	71306	NM_001177882	1	9	3799	3791	0.0181
mmu-miR-181a-5p	MIMAT0000210	Mfap3l	71306	NM_027756	1	9	3888	3880	0.0181
mmu-miR-181a-5p	MIMAT0000210	Mfap3l	71306	NM_001177881	1	9	4031	4023	0.0181
mmu-miR-181a-5p	MIMAT0000210	Mfn2	170731	NM_133201	1	8	4053	4046	0.027
mmu-miR-181a-5p	MIMAT0000210	Mgll	23945	NM_001166250	1	7	889	883	0.0216
mmu-miR-181a-5p	MIMAT0000210	Mkrn1	54484	NM_018810	1	9	2478	2470	0.0053
mmu-miR-181a-5p	MIMAT0000210	Mlf1	17349	NM_010801	1	8	1058	1051	0.0032
mmu-miR-181a-5p	MIMAT0000210	Mlf1	17349	NM_001039543	1	8	1103	1096	0.0032
mmu-miR-181a-5p	MIMAT0000210	Mlh3	217716	NM_175337	1	8	5395	5388	0.017
mmu-miR-181a-5p	MIMAT0000210	Mmp14	17387	NM_008608	1	10	2279	2270	0.0006
mmu-miR-181a-5p	MIMAT0000210	Mmp25	240047	NM_001033339	1	8	2768	2761	0.0168
mmu-miR-181a-5p	MIMAT0000210	Mmrn1	70945	NM_001163507	1	8	4006	3999	0.0115
mmu-miR-181a-5p	MIMAT0000210	Mmrn1	70945	NM_027613	1	8	4009	4002	0.0115
mmu-miR-181a-5p	MIMAT0000210	Morc2a	74522	NM_198162	1	8	3817	3810	0.0196
mmu-miR-181a-5p	MIMAT0000210	Morc2a	74522	NM_001159288	1	8	4487	4480	0.0191
mmu-miR-181a-5p	MIMAT0000210	Mov10l1	83456	NM_031260	1	8	3916	3909	0.0055
mmu-miR-181a-5p	MIMAT0000210	Mrpl13	68537	NM_026759	1	8	608	601	0.0034
mmu-miR-181a-5p	MIMAT0000210	Mrps9	69527	NM_023514	1	7	1412	1406	0.0129
mmu-miR-181a-5p	MIMAT0000210	Ms4a4d	66607	NM_025658	1	8	1401	1394	0.0071
mmu-miR-181a-5p	MIMAT0000210	Ms4a6b	69774	NM_027209	1	7	1131	1125	0.0488
mmu-miR-181a-5p	MIMAT0000210	Ms4a6d	68774	NM_026835	1	7	1152	1146	0.0306
mmu-miR-181a-5p	MIMAT0000210	Mterfd1	66410	NM_025547	1	8	1412	1405	0.0014
mmu-miR-181a-5p	MIMAT0000210	Mtf2	17765	NM_001253880	1	9	3544	3536	0.0086
mmu-miR-181a-5p	MIMAT0000210	Mtf2	17765	NM_013827	1	9	3825	3817	0.0086
mmu-miR-181a-5p	MIMAT0000210	Mtf2	17765	NM_001253879	1	9	3829	3821	0.0086
mmu-miR-181a-5p	MIMAT0000210	Mtf2	17765	NM_001253878	1	9	3906	3898	0.0086
mmu-miR-181a-5p	MIMAT0000210	Mtf2	17765	NM_001253877	1	9	4187	4179	0.0086
mmu-miR-181a-5p	MIMAT0000210	Mtmr12	268783	NM_172958	1	8	3920	3913	0.0326
mmu-miR-181a-5p	MIMAT0000210	Mut	17850	NM_008650	1	8	3207	3200	0.0195
mmu-miR-181a-5p	MIMAT0000210	Myb	17863	NM_010848	1	9	2642	2634	0.0047
mmu-miR-181a-5p	MIMAT0000210	Myb	17863	NM_001198914	1	9	2999	2991	0.0047
mmu-miR-181a-5p	MIMAT0000210	Mycs	17870	NM_010850	1	8	1777	1770	0.0125
mmu-miR-181a-5p	MIMAT0000210	Myh10	77579	NM_175260	1	8	7205	7198	0.0234
mmu-miR-181a-5p	MIMAT0000210	Mylk3	213435	NM_175441	1	7	2803	2797	0.0319
mmu-miR-181a-5p	MIMAT0000210	Myo19	66196	NM_025414	1	7	3617	3611	0.0365
mmu-miR-181a-5p	MIMAT0000210	Myom2	17930	NM_008664	1	7	4671	4665	0.0279
mmu-miR-181a-5p	MIMAT0000210	Myot	58916	NM_001033621	1	7	1901	1895	0.0266
mmu-miR-181a-5p	MIMAT0000210	Naa16	66897	NM_025832	1	8	3205	3198	0.0191
mmu-miR-181a-5p	MIMAT0000210	Naa20	67877	NM_026425	1	8	1069	1062	0.0085
mmu-miR-181a-5p	MIMAT0000210	Naa20	67877	NM_001141965	1	8	1039	1032	0.0085
mmu-miR-181a-5p	MIMAT0000210	Nabp1	109019	NM_028696	1	8	2748	2741	0.0265
mmu-miR-181a-5p	MIMAT0000210	Nadsyn1	78914	NM_030221	1	7	2383	2377	0.0214
mmu-miR-181a-5p	MIMAT0000210	Napg	108123	NM_028017	1	11	1108	1098	0.0006
mmu-miR-181a-5p	MIMAT0000210	Nbr1	17966	NM_001252222	1	9	3751	3743	0.0046
mmu-miR-181a-5p	MIMAT0000210	Nbr1	17966	NM_001252223	1	9	3756	3748	0.0052
mmu-miR-181a-5p	MIMAT0000210	Nbr1	17966	NM_008676	1	9	3862	3854	0.0046
mmu-miR-181a-5p	MIMAT0000210	Nbr1	17966	NM_001252220	1	9	4039	4031	0.0047
mmu-miR-181a-5p	MIMAT0000210	Ncbp1	433702	NM_001033201	1	9	2781	2773	0.0017
mmu-miR-181a-5p	MIMAT0000210	Nceh1	320024	NM_178772	1	9	1944	1936	0.0117
mmu-miR-181a-5p	MIMAT0000210	Ndrg2	29811	NM_001145959	1	8	1761	1754	0.0132
mmu-miR-181a-5p	MIMAT0000210	Ndrg2	29811	NM_013864	1	8	1803	1796	0.0132
mmu-miR-181a-5p	MIMAT0000210	Neil3	234258	NM_146208	1	7	2253	2247	0.0179
mmu-miR-181a-5p	MIMAT0000210	Nell2	54003	NM_016743	1	7	2753	2747	0.0402
mmu-miR-181a-5p	MIMAT0000210	Nenf	66208	NM_025424	1	7	657	651	0.0071
mmu-miR-181a-5p	MIMAT0000210	Neo1	18007	NM_001042752	1	8	5540	5533	0.0388
mmu-miR-181a-5p	MIMAT0000210	Neo1	18007	NM_008684	1	8	5621	5614	0.0388
mmu-miR-181a-5p	MIMAT0000210	Neu3	50877	NM_016720	1	8	3292	3285	0.0274
mmu-miR-181a-5p	MIMAT0000210	Nfib	18028	NM_008687	1	9	6797	6789	0.025
mmu-miR-181a-5p	MIMAT0000210	Nfib	18028	NM_001113209	1	9	7135	7127	0.0245
mmu-miR-181a-5p	MIMAT0000210	Nfib	18028	NM_001113210	1	9	7108	7100	0.0246
mmu-miR-181a-5p	MIMAT0000210	Nfs1	18041	NM_010911	1	7	1563	1557	0.0375
mmu-miR-181a-5p	MIMAT0000210	Nipal1	70701	NM_001081205	1	9	4038	4030	0.0109
mmu-miR-181a-5p	MIMAT0000210	Nlrp4e	446099	NM_001004194	1	8	3320	3313	0.0054
mmu-miR-181a-5p	MIMAT0000210	Nmb	68039	NM_026523	1	7	616	610	0.0146
mmu-miR-181a-5p	MIMAT0000210	Nmnat3	74080	NM_144533	1	9	2093	2085	0.0038
mmu-miR-181a-5p	MIMAT0000210	Nnt	18115	NM_008710	1	10	3723	3714	0.0018
mmu-miR-181a-5p	MIMAT0000210	Nol4	319211	NM_001161483	1	8	2698	2691	0.0269
mmu-miR-181a-5p	MIMAT0000210	Nol4	319211	NM_199024	1	8	4185	4178	0.0295
mmu-miR-181a-5p	MIMAT0000210	Npcd	504193	NM_001013362	1	9	4848	4840	0.0127
mmu-miR-181a-5p	MIMAT0000210	Npcd	504193	NM_001013360	1	9	4557	4549	0.0127
mmu-miR-181a-5p	MIMAT0000210	Nploc4	217365	NM_199469	1	8	2318	2311	0.0399
mmu-miR-181a-5p	MIMAT0000210	Nploc4	217365	NM_001195023	1	8	2414	2407	0.0399
mmu-miR-181a-5p	MIMAT0000210	Npm1	18148	NM_001252260	1	7	1283	1277	0.0202
mmu-miR-181a-5p	MIMAT0000210	Npm1	18148	NM_008722	1	7	1322	1316	0.0202
mmu-miR-181a-5p	MIMAT0000210	Nptn	20320	NM_009145	1	8	1275	1268	0.0157
mmu-miR-181a-5p	MIMAT0000210	Nptxr	73340	NM_030689	1	9	4924	4916	0.0128
mmu-miR-181a-5p	MIMAT0000210	Npy6r	18169	NM_010935	1	8	2179	2172	0.0162
mmu-miR-181a-5p	MIMAT0000210	Nr1d2	353187	NM_011584	1	8	2264	2257	0.0393
mmu-miR-181a-5p	MIMAT0000210	Nr3c1	14815	NM_008173	1	9	4555	4547	0.015
mmu-miR-181a-5p	MIMAT0000210	Nrf1	18181	NM_001164230	1	9	2045	2037	0.0028
mmu-miR-181a-5p	MIMAT0000210	Nrf1	18181	NM_001164229	1	9	2122	2114	0.0028
mmu-miR-181a-5p	MIMAT0000210	Nrp1	18186	NM_008737	1	8	4689	4682	0.0398
mmu-miR-181a-5p	MIMAT0000210	Nrp2	18187	NM_001077407	1	8	4640	4633	0.0167
mmu-miR-181a-5p	MIMAT0000210	Nrp2	18187	NM_001077406	1	8	4655	4648	0.0167
mmu-miR-181a-5p	MIMAT0000210	Nrsn2	228777	NM_001009948	1	7	1045	1039	0.0477
mmu-miR-181a-5p	MIMAT0000210	Nxnl2	75124	NM_029173	1	11	940	930	0.0001
mmu-miR-181a-5p	MIMAT0000210	Oat	18242	NM_016978	1	8	1824	1817	0.0105
mmu-miR-181a-5p	MIMAT0000210	Ociad1	68095	NM_001159889	1	8	1045	1038	0.0387
mmu-miR-181a-5p	MIMAT0000210	Odc1	18263	NM_013614	1	7	2143	2137	0.0448
mmu-miR-181a-5p	MIMAT0000210	Olfm1	56177	NM_019498	1	8	2402	2395	0.0153
mmu-miR-181a-5p	MIMAT0000210	Olfm1	56177	NM_001038613	1	8	2361	2354	0.0153
mmu-miR-181a-5p	MIMAT0000210	Olfr112	258096	NM_001013575	1	7	3092	3086	0.0066
mmu-miR-181a-5p	MIMAT0000210	Olfr613	259104	NM_147100	1	8	4029	4022	0.0413
mmu-miR-181a-5p	MIMAT0000210	Olig2	50913	NM_016967	1	8	1752	1745	0.0201
mmu-miR-181a-5p	MIMAT0000210	Oma1	67013	NM_025909	1	7	1728	1722	0.0147
mmu-miR-181a-5p	MIMAT0000210	Osbpl3	71720	NM_027881	1	9	3023	3015	0.0142
mmu-miR-181a-5p	MIMAT0000210	Osbpl3	71720	NM_001163645	1	9	3305	3297	0.0142
mmu-miR-181a-5p	MIMAT0000210	Otor	57329	NM_020595	1	7	887	881	0.0321
mmu-miR-181a-5p	MIMAT0000210	Pak4	70584	NM_027470	1	8	2589	2582	0.0126
mmu-miR-181a-5p	MIMAT0000210	Pak7	241656	NM_172858	1	8	3942	3935	0.032
mmu-miR-181a-5p	MIMAT0000210	Palb2	233826	NM_001081238	1	8	3725	3718	0.0039
mmu-miR-181a-5p	MIMAT0000210	Parn	74108	NM_028761	1	8	2272	2265	0.0134
mmu-miR-181a-5p	MIMAT0000210	Parp2	11546	NM_009632	1	8	1687	1680	0.0023
mmu-miR-181a-5p	MIMAT0000210	Parpbp	75317	NM_029249	1	9	3124	3116	0.0055
mmu-miR-181a-5p	MIMAT0000210	Pbsn	54192	NM_017471	1	9	757	749	0.001
mmu-miR-181a-5p	MIMAT0000210	Pbx1	18514	NM_008783	1	9	3695	3687	0.0083
mmu-miR-181a-5p	MIMAT0000210	Pcbp1	23983	NM_011865	1	7	1618	1612	0.0228
mmu-miR-181a-5p	MIMAT0000210	Pcdh15	11994	NM_023115	1	8	6635	6628	0.042
mmu-miR-181a-5p	MIMAT0000210	Pcdh15	11994	NM_001142737	1	8	6407	6400	0.042
mmu-miR-181a-5p	MIMAT0000210	Pcdh15	11994	NM_001142738	1	8	6494	6487	0.042
mmu-miR-181a-5p	MIMAT0000210	Pcdh15	11994	NM_001142741	1	8	6545	6538	0.042
mmu-miR-181a-5p	MIMAT0000210	Pcdh15	11994	NM_001142739	1	8	6554	6547	0.042
mmu-miR-181a-5p	MIMAT0000210	Pcdh15	11994	NM_001142740	1	8	6605	6598	0.042
mmu-miR-181a-5p	MIMAT0000210	Pcdh15	11994	NM_001142736	1	8	6614	6607	0.042
mmu-miR-181a-5p	MIMAT0000210	Pcdh15	11994	NM_001142735	1	8	6620	6613	0.042
mmu-miR-181a-5p	MIMAT0000210	Pcdh18	73173	NM_130448	1	8	5088	5081	0.0198
mmu-miR-181a-5p	MIMAT0000210	Pcdh7	54216	NM_018764	1	8	4815	4808	0.0199
mmu-miR-181a-5p	MIMAT0000210	Pcdha1	116731	NM_054072	1	8	4319	4312	0.036
mmu-miR-181a-5p	MIMAT0000210	Pcdha10	12943	NM_009961	1	8	4313	4306	0.036
mmu-miR-181a-5p	MIMAT0000210	Pcdha11	12942	NM_009960	1	8	4325	4318	0.036
mmu-miR-181a-5p	MIMAT0000210	Pcdha12	192164	NM_138663	1	8	4325	4318	0.036
mmu-miR-181a-5p	MIMAT0000210	Pcdha2	353234	NM_198117	1	8	4432	4425	0.0362
mmu-miR-181a-5p	MIMAT0000210	Pcdha3	192163	NM_138662	1	8	4301	4294	0.036
mmu-miR-181a-5p	MIMAT0000210	Pcdha4	12936	NM_007766	1	8	4393	4386	0.036
mmu-miR-181a-5p	MIMAT0000210	Pcdha5	12941	NM_009959	1	8	4277	4270	0.036
mmu-miR-181a-5p	MIMAT0000210	Pcdha6	12937	NM_007767	1	8	4313	4306	0.036
mmu-miR-181a-5p	MIMAT0000210	Pcdha7	12939	NM_009957	1	8	4286	4279	0.036
mmu-miR-181a-5p	MIMAT0000210	Pcdha8	353235	NM_201243	1	8	4313	4306	0.036
mmu-miR-181a-5p	MIMAT0000210	Pcdha9	192161	NM_138661	1	8	4412	4405	0.036
mmu-miR-181a-5p	MIMAT0000210	Pcdhac1	353236	NM_001003671	1	8	4367	4360	0.036
mmu-miR-181a-5p	MIMAT0000210	Pcdhac2	353237	NM_001003672	1	8	4493	4486	0.036
mmu-miR-181a-5p	MIMAT0000210	Pcgf2	22658	NM_001163308	1	10	1683	1674	0.0011
mmu-miR-181a-5p	MIMAT0000210	Pcgf2	22658	NM_001163307	1	10	1821	1812	0.0011
mmu-miR-181a-5p	MIMAT0000210	Pcgf2	22658	NM_009545	1	10	2088	2079	0.0011
mmu-miR-181a-5p	MIMAT0000210	Pcna	18538	NM_011045	1	8	1157	1150	0.005
mmu-miR-181a-5p	MIMAT0000210	Pdap1	231887	NM_001033313	1	9	905	897	0.0059
mmu-miR-181a-5p	MIMAT0000210	Pdhb	68263	NM_024221	1	7	1298	1292	0.0208
mmu-miR-181a-5p	MIMAT0000210	Pdia6	71853	NM_027959	1	9	1625	1617	0.0029
mmu-miR-181a-5p	MIMAT0000210	Pdp1	381511	NM_001098231	1	8	2443	2436	0.0358
mmu-miR-181a-5p	MIMAT0000210	Pdp1	381511	NM_001033453	1	8	2492	2485	0.0358
mmu-miR-181a-5p	MIMAT0000210	Pdp1	381511	NM_001098230	1	8	2527	2520	0.0358
mmu-miR-181a-5p	MIMAT0000210	Pecr	111175	NM_023523	1	7	1070	1064	0.0118
mmu-miR-181a-5p	MIMAT0000210	Peg10	170676	NM_130877	1	8	4195	4188	0.0489
mmu-miR-181a-5p	MIMAT0000210	Per2	18627	NM_011066	1	9	5459	5451	0.0072
mmu-miR-181a-5p	MIMAT0000210	Pfkp	56421	NM_019703	1	8	3523	3516	0.0239
mmu-miR-181a-5p	MIMAT0000210	Phf14	75725	NM_029404	1	9	4280	4272	0.0166
mmu-miR-181a-5p	MIMAT0000210	Phf15	76901	NM_199299	1	10	3700	3691	0.0033
mmu-miR-181a-5p	MIMAT0000210	Phf5a	68479	NM_026737	1	8	1319	1312	0.0194
mmu-miR-181a-5p	MIMAT0000210	Phox2b	18935	NM_008888	1	10	2397	2388	0.0016
mmu-miR-181a-5p	MIMAT0000210	Pias3	229615	NM_018812	1	8	2724	2717	0.0145
mmu-miR-181a-5p	MIMAT0000210	Pias3	229615	NM_001165949	1	8	2829	2822	0.0145
mmu-miR-181a-5p	MIMAT0000210	Pias3	229615	NM_146135	1	8	2866	2859	0.0145
mmu-miR-181a-5p	MIMAT0000210	Pifo	100503311	NM_029604	1	7	907	901	0.0116
mmu-miR-181a-5p	MIMAT0000210	Pifo	100503311	NM_001200028	1	7	955	949	0.0116
mmu-miR-181a-5p	MIMAT0000210	Pigm	67556	NM_026234	1	9	2924	2916	0.0231
mmu-miR-181a-5p	MIMAT0000210	Pigo	56703	NM_020035	1	8	4236	4229	0.0045
mmu-miR-181a-5p	MIMAT0000210	Pinx1	72400	NM_028228	1	9	1287	1279	0.0009
mmu-miR-181a-5p	MIMAT0000210	Pla2g4a	18783	NM_008869	1	8	2743	2736	0.0067
mmu-miR-181a-5p	MIMAT0000210	Pla2g4d	78390	NM_001024137	1	9	3280	3272	0.003
mmu-miR-181a-5p	MIMAT0000210	Plcg1	18803	NM_021280	1	8	4274	4267	0.006
mmu-miR-181a-5p	MIMAT0000210	Plcl1	227120	NM_001114663	1	9	6460	6452	0.0107
mmu-miR-181a-5p	MIMAT0000210	Plekhb2	226971	NM_145516	1	9	1636	1628	0.0096
mmu-miR-181a-5p	MIMAT0000210	Plekhm3	241075	NM_001039493	1	9	3565	3557	0.0223
mmu-miR-181a-5p	MIMAT0000210	Plin3	66905	NM_025836	1	7	1539	1533	0.0459
mmu-miR-181a-5p	MIMAT0000210	Plxdc2	67448	NM_026162	1	8	2872	2865	0.0123
mmu-miR-181a-5p	MIMAT0000210	Plxnc1	54712	NM_018797	1	8	7003	6996	0.035
mmu-miR-181a-5p	MIMAT0000210	Pmaip1	58801	NM_021451	1	8	900	893	0.0328
mmu-miR-181a-5p	MIMAT0000210	Pnma5	385377	NM_001100461	1	8	2280	2273	0.0061
mmu-miR-181a-5p	MIMAT0000210	Pnpla8	67452	NM_026164	1	9	2832	2824	0.0071
mmu-miR-181a-5p	MIMAT0000210	Polr3d	67065	NM_001164082	1	7	1827	1821	0.0423
mmu-miR-181a-5p	MIMAT0000210	Polr3d	67065	NM_025945	1	7	1859	1853	0.0423
mmu-miR-181a-5p	MIMAT0000210	Polr3g	67486	NM_001081176	1	9	1090	1082	0.0084
mmu-miR-181a-5p	MIMAT0000210	Pom121	107939	NM_148932	1	9	5197	5189	0.0074
mmu-miR-181a-5p	MIMAT0000210	Pot1a	101185	NM_133931	1	9	3055	3047	0.0032
mmu-miR-181a-5p	MIMAT0000210	Poteg	70952	NM_026256	1	8	1197	1190	0.0038
mmu-miR-181a-5p	MIMAT0000210	Ppapdc3	227721	NM_145521	1	8	1472	1465	0.0128
mmu-miR-181a-5p	MIMAT0000210	Ppp1cb	19046	NM_172707	1	8	2469	2462	0.0397
mmu-miR-181a-5p	MIMAT0000210	Ppp1r1c	75276	NM_172420	1	8	995	988	0.0289
mmu-miR-181a-5p	MIMAT0000210	Ppp1r2	66849	NM_025800	1	8	2462	2455	0.0472
mmu-miR-181a-5p	MIMAT0000210	Ppp1r3a	140491	NM_080464	1	9	4807	4799	0.0145
mmu-miR-181a-5p	MIMAT0000210	Ppp1r3c	53412	NM_016854	1	8	2122	2115	0.0257
mmu-miR-181a-5p	MIMAT0000210	Ppp3r1	19058	NM_024459	1	10	2733	2724	0.002
mmu-miR-181a-5p	MIMAT0000210	Prdm9	213389	NM_144809	1	9	3179	3171	0.0034
mmu-miR-181a-5p	MIMAT0000210	Prdx1	18477	NM_011034	1	7	1040	1034	0.0444
mmu-miR-181a-5p	MIMAT0000210	Prelp	116847	NM_054077	1	8	2803	2796	0.0345
mmu-miR-181a-5p	MIMAT0000210	Prf1	18646	NM_011073	1	7	1880	1874	0.0202
mmu-miR-181a-5p	MIMAT0000210	Prg4	96875	NM_001110146	1	7	1402	1396	0.0343
mmu-miR-181a-5p	MIMAT0000210	Prg4	96875	NM_021400	1	7	3796	3790	0.0343
mmu-miR-181a-5p	MIMAT0000210	Prl6a1	19111	NM_011166	1	8	820	813	0.0025
mmu-miR-181a-5p	MIMAT0000210	Prnd	26434	NM_023043	1	8	1811	1804	0.0385
mmu-miR-181a-5p	MIMAT0000210	Pros1	19128	NM_011173	1	8	2760	2753	0.0173
mmu-miR-181a-5p	MIMAT0000210	Proser1	212127	NM_173382	1	8	3963	3956	0.017
mmu-miR-181a-5p	MIMAT0000210	Prr9	109314	NM_175424	1	7	639	633	0.0463
mmu-miR-181a-5p	MIMAT0000210	Prtg	235472	NM_175485	1	9	3926	3918	0.0189
mmu-miR-181a-5p	MIMAT0000210	Psip1	101739	NM_133948	1	8	2300	2293	0.0202
mmu-miR-181a-5p	MIMAT0000210	Pspc1	66645	NM_025682	1	8	1933	1926	0.0098
mmu-miR-181a-5p	MIMAT0000210	Ptcd3	69956	NM_027275	1	7	2116	2110	0.0313
mmu-miR-181a-5p	MIMAT0000210	Pten	19211	NM_008960	1	9	7001	6993	0.0232
mmu-miR-181a-5p	MIMAT0000210	Ptges	64292	NM_022415	1	8	1342	1335	0.0463
mmu-miR-181a-5p	MIMAT0000210	Ptp4a1	19243	NM_011200	1	10	2651	2642	0.0028
mmu-miR-181a-5p	MIMAT0000210	Ptpdc1	218232	NM_207232	1	8	3932	3925	0.0283
mmu-miR-181a-5p	MIMAT0000210	Ptplad2	66775	NM_025760	1	8	1006	999	0.0201
mmu-miR-181a-5p	MIMAT0000210	Pvrl3	58998	NM_021495	1	8	2955	2948	0.0188
mmu-miR-181a-5p	MIMAT0000210	Pwp1	103136	NM_133993	1	9	2176	2168	0.0037
mmu-miR-181a-5p	MIMAT0000210	Rab11a	53869	NM_017382	1	8	1018	1011	0.0234
mmu-miR-181a-5p	MIMAT0000210	Rab27a	11891	NM_023635	1	8	2703	2696	0.0321
mmu-miR-181a-5p	MIMAT0000210	Rab39	270160	NM_175562	1	8	1658	1651	0.033
mmu-miR-181a-5p	MIMAT0000210	Rabgef1	56715	NM_001199059	1	9	2097	2089	0.0043
mmu-miR-181a-5p	MIMAT0000210	Rabgef1	56715	NM_019983	1	9	2242	2234	0.0043
mmu-miR-181a-5p	MIMAT0000210	Rad17	19356	NM_001044371	1	8	2480	2473	0.0075
mmu-miR-181a-5p	MIMAT0000210	Rad17	19356	NM_011233	1	8	2608	2601	0.0075
mmu-miR-181a-5p	MIMAT0000210	Rad21	19357	NM_009009	1	9	3462	3454	0.0056
mmu-miR-181a-5p	MIMAT0000210	Ralgapa1	56784	NM_001003719	1	8	6940	6933	0.0187
mmu-miR-181a-5p	MIMAT0000210	Ralgapa1	56784	NM_001112714	1	8	6968	6961	0.0213
mmu-miR-181a-5p	MIMAT0000210	Ralgapa1	56784	NM_019994	1	8	6971	6964	0.0213
mmu-miR-181a-5p	MIMAT0000210	Ramp3	56089	NM_019511	1	7	530	524	0.044
mmu-miR-181a-5p	MIMAT0000210	Rassf10	78748	NM_175279	1	9	2157	2149	0.0066
mmu-miR-181a-5p	MIMAT0000210	Rassf2	215653	NM_175445	1	9	3101	3093	0.0135
mmu-miR-181a-5p	MIMAT0000210	Rassf8	71323	NM_027760	1	8	1688	1681	0.006
mmu-miR-181a-5p	MIMAT0000210	Rbbp7	245688	NM_009031	1	7	1795	1789	0.0403
mmu-miR-181a-5p	MIMAT0000210	Rbfox3	52897	NM_001039167	1	9	3571	3563	0.0108
mmu-miR-181a-5p	MIMAT0000210	Rbfox3	52897	NM_001024931	1	9	2033	2025	0.0056
mmu-miR-181a-5p	MIMAT0000210	Rbfox3	52897	NM_001039168	1	9	3427	3419	0.0108
mmu-miR-181a-5p	MIMAT0000210	Rbm18	67889	NM_001159635	1	8	1258	1251	0.0264
mmu-miR-181a-5p	MIMAT0000210	Rbm18	67889	NM_026434	1	8	1348	1341	0.0264
mmu-miR-181a-5p	MIMAT0000210	Rbm26	74213	NM_134077	1	8	3822	3815	0.0103
mmu-miR-181a-5p	MIMAT0000210	Rbm27	225432	NM_172626	1	8	4447	4440	0.0457
mmu-miR-181a-5p	MIMAT0000210	Rbm43	71684	NM_030243	1	7	1546	1540	0.0442
mmu-miR-181a-5p	MIMAT0000210	Rbm43	71684	NM_001141982	1	7	1572	1566	0.0442
mmu-miR-181a-5p	MIMAT0000210	Rbm43	71684	NM_001141981	1	7	1653	1647	0.0442
mmu-miR-181a-5p	MIMAT0000210	Rcbtb2	105670	NM_134083	1	9	3028	3020	0.0056
mmu-miR-181a-5p	MIMAT0000210	Rcbtb2	105670	NM_001170694	1	9	3033	3025	0.0056
mmu-miR-181a-5p	MIMAT0000210	Rcn2	26611	NM_011992	1	8	1957	1950	0.0132
mmu-miR-181a-5p	MIMAT0000210	Rcor2	104383	NM_054048	1	7	1895	1889	0.035
mmu-miR-181a-5p	MIMAT0000210	Reck	53614	NM_016678	1	9	4021	4013	0.0055
mmu-miR-181a-5p	MIMAT0000210	Reep1	52250	NM_178608	1	8	3256	3249	0.0436
mmu-miR-181a-5p	MIMAT0000210	Rfk	54391	NM_019437	1	8	2431	2424	0.0263
mmu-miR-181a-5p	MIMAT0000210	Rfwd2	26374	NM_011931	1	8	4291	4284	0.041
mmu-miR-181a-5p	MIMAT0000210	Rfx5	53970	NM_017395	1	9	3952	3944	0.0083
mmu-miR-181a-5p	MIMAT0000210	Rfx6	320995	NM_001159389	1	8	2946	2939	0.0095
mmu-miR-181a-5p	MIMAT0000210	Rfx6	320995	NM_177306	1	8	2577	2570	0.0095
mmu-miR-181a-5p	MIMAT0000210	Rgma	244058	NM_177740	1	8	2713	2706	0.0281
mmu-miR-181a-5p	MIMAT0000210	Rgs4	19736	NM_009062	1	8	1707	1700	0.0332
mmu-miR-181a-5p	MIMAT0000210	Rhbdf2	217344	NM_001167680	1	8	2950	2943	0.014
mmu-miR-181a-5p	MIMAT0000210	Rhbdf2	217344	NM_172572	1	8	3164	3157	0.014
mmu-miR-181a-5p	MIMAT0000210	Rhobtb3	73296	NM_028493	1	9	4234	4226	0.0107
mmu-miR-181a-5p	MIMAT0000210	Rlim	19820	NM_011276	1	9	6151	6143	0.0201
mmu-miR-181a-5p	MIMAT0000210	Rmdn2	381110	NM_201361	1	7	1601	1595	0.028
mmu-miR-181a-5p	MIMAT0000210	Rnf145	74315	NM_001166553	1	8	2394	2387	0.047
mmu-miR-181a-5p	MIMAT0000210	Rnf34	80751	NM_030564	1	8	1628	1621	0.0113
mmu-miR-181a-5p	MIMAT0000210	Rnf7	19823	NM_011279	1	7	705	699	0.0463
mmu-miR-181a-5p	MIMAT0000210	Rom1	19881	NM_009073	1	7	1477	1471	0.0174
mmu-miR-181a-5p	MIMAT0000210	Rpap2	231571	NM_001163461	1	9	2596	2588	0.0034
mmu-miR-181a-5p	MIMAT0000210	Rpap2	231571	NM_001163462	1	9	2667	2659	0.0034
mmu-miR-181a-5p	MIMAT0000210	Rpgrip1l	244585	NM_173431	1	9	3966	3958	0.0119
mmu-miR-181a-5p	MIMAT0000210	Rpia	19895	NM_009075	1	9	1659	1651	0.0032
mmu-miR-181a-5p	MIMAT0000210	Rpl10l	238217	NM_001162933	1	7	769	763	0.0255
mmu-miR-181a-5p	MIMAT0000210	Rpl22	19934	NM_009079	1	8	2155	2148	0.025
mmu-miR-181a-5p	MIMAT0000210	Rprd1a	225283	NM_144861	1	8	2504	2497	0.0479
mmu-miR-181a-5p	MIMAT0000210	Rraga	68441	NM_178376	1	7	1530	1524	0.028
mmu-miR-181a-5p	MIMAT0000210	Rragc	54170	NM_017475	1	8	1610	1603	0.02
mmu-miR-181a-5p	MIMAT0000210	Rreb1	68750	NM_001177868	1	9	4745	4737	0.0114
mmu-miR-181a-5p	MIMAT0000210	Rreb1	68750	NM_026830	1	9	4988	4980	0.0114
mmu-miR-181a-5p	MIMAT0000210	Rreb1	68750	NM_001039188	1	9	5020	5012	0.0114
mmu-miR-181a-5p	MIMAT0000210	Rsad1	237926	NM_001013381	1	9	4068	4060	0.0104
mmu-miR-181a-5p	MIMAT0000210	Rsph4a	212892	NM_001162957	1	8	3051	3044	0.0219
mmu-miR-181a-5p	MIMAT0000210	Rspo2	239405	NM_172815	1	8	3158	3151	0.0261
mmu-miR-181a-5p	MIMAT0000210	Rtel1	269400	NM_001166668	1	8	3687	3680	0.0082
mmu-miR-181a-5p	MIMAT0000210	Rtel1	269400	NM_001166667	1	8	3795	3788	0.0082
mmu-miR-181a-5p	MIMAT0000210	Rtel1	269400	NM_001166666	1	8	3813	3806	0.0082
mmu-miR-181a-5p	MIMAT0000210	Rtel1	269400	NM_001166665	1	8	3912	3905	0.0082
mmu-miR-181a-5p	MIMAT0000210	Rtel1	269400	NM_001001882	1	8	3930	3923	0.0082
mmu-miR-181a-5p	MIMAT0000210	S1pr4	13611	NM_010102	1	8	1804	1797	0.0111
mmu-miR-181a-5p	MIMAT0000210	Sall4	99377	NM_201396	1	8	2694	2687	0.0256
mmu-miR-181a-5p	MIMAT0000210	Sall4	99377	NM_201395	1	8	3729	3722	0.0256
mmu-miR-181a-5p	MIMAT0000210	Sall4	99377	NM_175303	1	8	5061	5054	0.0256
mmu-miR-181a-5p	MIMAT0000210	Samt1	78092	NM_030036	1	7	903	897	0.0073
mmu-miR-181a-5p	MIMAT0000210	Sap30	60406	NM_021788	1	7	1007	1001	0.0137
mmu-miR-181a-5p	MIMAT0000210	Saysd1	67509	NM_026209	1	8	1009	1002	0.025
mmu-miR-181a-5p	MIMAT0000210	Sbno1	243272	NM_001081203	1	9	7596	7588	0.022
mmu-miR-181a-5p	MIMAT0000210	Sbsn	282619	NM_172205	1	7	2165	2159	0.0103
mmu-miR-181a-5p	MIMAT0000210	Sbsn	282619	NM_001083903	1	7	611	605	0.0103
mmu-miR-181a-5p	MIMAT0000210	Schip1	30953	NM_013928	1	8	1491	1484	0.0095
mmu-miR-181a-5p	MIMAT0000210	Schip1	30953	NM_001113421	1	8	2085	2078	0.0095
mmu-miR-181a-5p	MIMAT0000210	Schip1	30953	NM_001113420	1	8	1401	1394	0.0095
mmu-miR-181a-5p	MIMAT0000210	Scoc	56367	NM_001039137	1	8	686	679	0.0212
mmu-miR-181a-5p	MIMAT0000210	Scoc	56367	NM_019708	1	8	782	775	0.0212
mmu-miR-181a-5p	MIMAT0000210	Sdcbp	53378	NM_016807	1	8	1023	1016	0.0235
mmu-miR-181a-5p	MIMAT0000210	Sdcbp	53378	NM_001098227	1	8	1026	1019	0.0235
mmu-miR-181a-5p	MIMAT0000210	Sdf2l1	64136	NM_022324	1	7	846	840	0.0229
mmu-miR-181a-5p	MIMAT0000210	Sec11a	56529	NM_019951	1	8	692	685	0.0072
mmu-miR-181a-5p	MIMAT0000210	Sec24a	77371	NM_175255	1	9	6037	6029	0.0109
mmu-miR-181a-5p	MIMAT0000210	Sec62	69276	NM_027016	1	8	3814	3807	0.0344
mmu-miR-181a-5p	MIMAT0000210	Seh1l	72124	NM_001039088	1	8	1977	1970	0.0349
mmu-miR-181a-5p	MIMAT0000210	Sel1l	20338	NM_011344	1	9	3794	3786	0.0144
mmu-miR-181a-5p	MIMAT0000210	Sel1l	20338	NM_001039089	1	9	3944	3936	0.0144
mmu-miR-181a-5p	MIMAT0000210	Sema4c	20353	NM_001126047	1	8	3494	3487	0.0136
mmu-miR-181a-5p	MIMAT0000210	Sema5a	20356	NM_009154	1	10	5256	5247	0.0066
mmu-miR-181a-5p	MIMAT0000210	Senp3	80886	NM_001163571	1	7	2040	2034	0.0251
mmu-miR-181a-5p	MIMAT0000210	Senp3	80886	NM_030702	1	7	2252	2246	0.0251
mmu-miR-181a-5p	MIMAT0000210	42248	93684	NM_053102	1	7	1457	1451	0.0435
mmu-miR-181a-5p	MIMAT0000210	Sepp1	20363	NM_001042613	1	7	1282	1276	0.0475
mmu-miR-181a-5p	MIMAT0000210	Sepp1	20363	NM_009155	1	7	1299	1293	0.0475
mmu-miR-181a-5p	MIMAT0000210	Sepp1	20363	NM_001042614	1	7	1365	1359	0.0475
mmu-miR-181a-5p	MIMAT0000210	Serbp1	66870	NM_001113566	1	9	3357	3349	0.0202
mmu-miR-181a-5p	MIMAT0000210	Serbp1	66870	NM_001113565	1	9	3375	3367	0.0202
mmu-miR-181a-5p	MIMAT0000210	Serbp1	66870	NM_001113564	1	9	3402	3394	0.0202
mmu-miR-181a-5p	MIMAT0000210	Serbp1	66870	NM_025814	1	9	3420	3412	0.0202
mmu-miR-181a-5p	MIMAT0000210	Serpine3	319433	NM_001199945	1	7	1291	1285	0.0081
mmu-miR-181a-5p	MIMAT0000210	Sestd1	228071	NM_175465	1	9	3520	3512	0.0256
mmu-miR-181a-5p	MIMAT0000210	Sfn	55948	NM_018754	1	8	1247	1240	0.0071
mmu-miR-181a-5p	MIMAT0000210	Sfr1	67788	NM_026377	1	7	1209	1203	0.0342
mmu-miR-181a-5p	MIMAT0000210	Sh2d3c	27387	NM_001252547	1	7	2291	2285	0.0263
mmu-miR-181a-5p	MIMAT0000210	Sh2d3c	27387	NM_013781	1	7	2777	2771	0.0263
mmu-miR-181a-5p	MIMAT0000210	Sh3bgrl	56726	NM_019989	1	8	536	529	0.0349
mmu-miR-181a-5p	MIMAT0000210	Sh3tc2	225608	NM_172628	1	7	4092	4086	0.039
mmu-miR-181a-5p	MIMAT0000210	Shisa3	330096	NM_001033415	1	8	3046	3039	0.0376
mmu-miR-181a-5p	MIMAT0000210	Shprh	268281	NM_172937	1	9	5611	5603	0.0089
mmu-miR-181a-5p	MIMAT0000210	Sirt1	93759	NM_001159589	1	8	2237	2230	0.0248
mmu-miR-181a-5p	MIMAT0000210	Sirt1	93759	NM_019812	1	8	2351	2344	0.0248
mmu-miR-181a-5p	MIMAT0000210	Six2	20472	NM_011380	1	8	2048	2041	0.0139
mmu-miR-181a-5p	MIMAT0000210	Slamf7	75345	NM_144539	1	8	3141	3134	0.0378
mmu-miR-181a-5p	MIMAT0000210	Slc16a12	240638	NM_172838	1	9	3151	3143	0.0085
mmu-miR-181a-5p	MIMAT0000210	Slc18a2	214084	NM_172523	1	8	2419	2412	0.0315
mmu-miR-181a-5p	MIMAT0000210	Slc25a32	69906	NM_172402	1	8	1482	1475	0.0268
mmu-miR-181a-5p	MIMAT0000210	Slc2a8	56017	NM_019488	1	7	1909	1903	0.0363
mmu-miR-181a-5p	MIMAT0000210	Slc34a2	20531	NM_011402	1	8	3983	3976	0.0307
mmu-miR-181a-5p	MIMAT0000210	Slc37a1	224674	NM_153062	1	8	2423	2416	0.0138
mmu-miR-181a-5p	MIMAT0000210	Slc37a1	224674	NM_001242427	1	8	2843	2836	0.0138
mmu-miR-181a-5p	MIMAT0000210	Slc39a12	277468	NM_001012305	1	7	2544	2538	0.0273
mmu-miR-181a-5p	MIMAT0000210	Slc40a1	53945	NM_016917	1	8	2526	2519	0.0202
mmu-miR-181a-5p	MIMAT0000210	Slc9a3r1	26941	NM_012030	1	7	1436	1430	0.04
mmu-miR-181a-5p	MIMAT0000210	Slmap	83997	NM_032008	1	9	4049	4041	0.0069
mmu-miR-181a-5p	MIMAT0000210	Smad7	17131	NM_001042660	1	8	4391	4384	0.0237
mmu-miR-181a-5p	MIMAT0000210	Smagp	207818	NM_001033872	1	7	845	839	0.0307
mmu-miR-181a-5p	MIMAT0000210	Smagp	207818	NM_174992	1	7	1025	1019	0.0307
mmu-miR-181a-5p	MIMAT0000210	Smarca4	20586	NM_001174079	1	8	6105	6098	0.0191
mmu-miR-181a-5p	MIMAT0000210	Smarca4	20586	NM_011417	1	8	6108	6101	0.0191
mmu-miR-181a-5p	MIMAT0000210	Smarca4	20586	NM_001174078	1	8	6117	6110	0.0191
mmu-miR-181a-5p	MIMAT0000210	Smek2	104570	NM_134034	1	8	4845	4838	0.0337
mmu-miR-181a-5p	MIMAT0000210	Smpd4	77626	NM_001164611	1	8	3547	3540	0.0306
mmu-miR-181a-5p	MIMAT0000210	Smpd4	77626	NM_001164610	1	8	3550	3543	0.0306
mmu-miR-181a-5p	MIMAT0000210	Smpd4	77626	NM_001164609	1	8	3589	3582	0.0306
mmu-miR-181a-5p	MIMAT0000210	Smpd4	77626	NM_029945	1	8	3637	3630	0.0306
mmu-miR-181a-5p	MIMAT0000210	Snap47	67826	NM_144521	1	7	1830	1824	0.0309
mmu-miR-181a-5p	MIMAT0000210	Snn	20621	NM_009223	1	9	771	763	0.0092
mmu-miR-181a-5p	MIMAT0000210	Snrpa1	68981	NM_021336	1	8	1153	1146	0.0032
mmu-miR-181a-5p	MIMAT0000210	Sntg1	71096	NM_027671	1	8	4020	4013	0.0123
mmu-miR-181a-5p	MIMAT0000210	Snupn	66069	NM_178374	1	7	1220	1214	0.0156
mmu-miR-181a-5p	MIMAT0000210	Socs5	56468	NM_019654	1	10	3590	3581	0.0023
mmu-miR-181a-5p	MIMAT0000210	Soga2	68617	NM_172963	1	8	6401	6394	0.0151
mmu-miR-181a-5p	MIMAT0000210	Soga2	68617	NM_001114098	1	8	6460	6453	0.0183
mmu-miR-181a-5p	MIMAT0000210	Sorcs1	58178	NM_001252501	1	8	4273	4266	0.0097
mmu-miR-181a-5p	MIMAT0000210	Sostdc1	66042	NM_025312	1	8	1282	1275	0.0152
mmu-miR-181a-5p	MIMAT0000210	Spata3	70060	NM_028647	1	7	1003	997	0.022
mmu-miR-181a-5p	MIMAT0000210	Spata31d1b	238662	NM_001167593	1	7	4221	4215	0.01
mmu-miR-181a-5p	MIMAT0000210	Spats2l	67198	NM_001164566	1	10	2355	2346	0.0018
mmu-miR-181a-5p	MIMAT0000210	Spats2l	67198	NM_144882	1	10	2544	2535	0.0018
mmu-miR-181a-5p	MIMAT0000210	Spc24	67629	NM_026282	1	8	789	782	0.0112
mmu-miR-181a-5p	MIMAT0000210	Spice1	212514	NM_144550	1	10	2987	2978	0.0016
mmu-miR-181a-5p	MIMAT0000210	Spink10	328971	NM_177829	1	7	804	798	0.0242
mmu-miR-181a-5p	MIMAT0000210	Spink11	433181	NM_001048217	1	7	382	376	0.0242
mmu-miR-181a-5p	MIMAT0000210	Spinkl	77424	NM_183123	1	7	364	358	0.0161
mmu-miR-181a-5p	MIMAT0000210	Spock1	20745	NM_001166465	1	8	1982	1975	0.0285
mmu-miR-181a-5p	MIMAT0000210	Spock1	20745	NM_001166464	1	8	1991	1984	0.0285
mmu-miR-181a-5p	MIMAT0000210	Sptb	20741	NM_013675	1	8	8717	8710	0.0412
mmu-miR-181a-5p	MIMAT0000210	Spty2d1	101685	NM_175318	1	8	5175	5168	0.0434
mmu-miR-181a-5p	MIMAT0000210	Srd5a3	57357	NM_020611	1	7	1139	1133	0.0431
mmu-miR-181a-5p	MIMAT0000210	Ss18l1	269397	NM_178750	1	9	3718	3710	0.0109
mmu-miR-181a-5p	MIMAT0000210	Ssx2ip	99167	NM_001253770	1	8	2855	2848	0.02
mmu-miR-181a-5p	MIMAT0000210	Ssx2ip	99167	NM_138744	1	8	2858	2851	0.02
mmu-miR-181a-5p	MIMAT0000210	Ssx2ip	99167	NM_001253769	1	8	3006	2999	0.02
mmu-miR-181a-5p	MIMAT0000210	Ssx2ip	99167	NM_001253768	1	8	3110	3103	0.02
mmu-miR-181a-5p	MIMAT0000210	St6gal2	240119	NM_172829	1	7	1485	1479	0.048
mmu-miR-181a-5p	MIMAT0000210	St6galnac3	20447	NM_011372	1	8	2854	2847	0.0432
mmu-miR-181a-5p	MIMAT0000210	St8sia3	20451	NM_009182	1	10	4223	4214	0.0042
mmu-miR-181a-5p	MIMAT0000210	Steap2	74051	NM_001103156	1	9	6668	6660	0.0322
mmu-miR-181a-5p	MIMAT0000210	Steap2	74051	NM_028734	1	9	6737	6729	0.0322
mmu-miR-181a-5p	MIMAT0000210	Steap2	74051	NM_001103157	1	9	7023	7015	0.0322
mmu-miR-181a-5p	MIMAT0000210	Stk30	26448	NM_011973	1	8	1663	1656	0.0037
mmu-miR-181a-5p	MIMAT0000210	Stk32c	57740	NM_021302	1	7	1983	1977	0.0351
mmu-miR-181a-5p	MIMAT0000210	Stk32c	57740	NM_001162540	1	7	1683	1677	0.0351
mmu-miR-181a-5p	MIMAT0000210	Suclg2	20917	NM_011507	1	8	2020	2013	0.0139
mmu-miR-181a-5p	MIMAT0000210	Sugt1	67955	NM_026474	1	8	1925	1918	0.0122
mmu-miR-181a-5p	MIMAT0000210	Sulf2	72043	NM_028072	1	8	2993	2986	0.0135
mmu-miR-181a-5p	MIMAT0000210	Sulf2	72043	NM_001252579	1	8	2997	2990	0.0135
mmu-miR-181a-5p	MIMAT0000210	Sulf2	72043	NM_001252578	1	8	3151	3144	0.0135
mmu-miR-181a-5p	MIMAT0000210	Supt5	20924	NM_013676	1	7	3443	3437	0.0168
mmu-miR-181a-5p	MIMAT0000210	Suv420h1	225888	NM_001167886	1	8	4916	4909	0.0406
mmu-miR-181a-5p	MIMAT0000210	Suv420h1	225888	NM_144871	1	8	4976	4969	0.0406
mmu-miR-181a-5p	MIMAT0000210	Suv420h1	225888	NM_001167887	1	8	4985	4978	0.0406
mmu-miR-181a-5p	MIMAT0000210	Suv420h1	225888	NM_001167885	1	8	5045	5038	0.0406
mmu-miR-181a-5p	MIMAT0000210	Synb	239167	NM_173420	1	7	2757	2751	0.033
mmu-miR-181a-5p	MIMAT0000210	Sync	68828	NM_023485	1	7	1839	1833	0.0305
mmu-miR-181a-5p	MIMAT0000210	Syncrip	56403	NM_019796	1	9	4864	4856	0.0185
mmu-miR-181a-5p	MIMAT0000210	Syne1	64009	NM_022027	1	9	4718	4710	0.0069
mmu-miR-181a-5p	MIMAT0000210	Syne1	64009	NM_001079686	1	9	10764	10756	0.0069
mmu-miR-181a-5p	MIMAT0000210	Synm	233335	NM_183312	1	8	3852	3845	0.0489
mmu-miR-181a-5p	MIMAT0000210	Synm	233335	NM_207663	1	8	6299	6292	0.0457
mmu-miR-181a-5p	MIMAT0000210	Synm	233335	NM_201639	1	8	7205	7198	0.0457
mmu-miR-181a-5p	MIMAT0000210	Tada1	27878	NM_030245	1	8	2077	2070	0.0139
mmu-miR-181a-5p	MIMAT0000210	Taf13	99730	NM_025444	1	8	1183	1176	0.0135
mmu-miR-181a-5p	MIMAT0000210	Taf2	319944	NM_001081288	1	8	3933	3926	0.0183
mmu-miR-181a-5p	MIMAT0000210	Taf3	209361	NM_027748	1	9	4388	4380	0.0069
mmu-miR-181a-5p	MIMAT0000210	Taf7	24074	NM_175770	1	8	3298	3291	0.03
mmu-miR-181a-5p	MIMAT0000210	Tars	110960	NM_033074	1	7	2431	2425	0.021
mmu-miR-181a-5p	MIMAT0000210	Tbc1d1	57915	NM_019636	1	9	5342	5334	0.0059
mmu-miR-181a-5p	MIMAT0000210	Tbc1d20	67231	NM_024196	1	7	1800	1794	0.0374
mmu-miR-181a-5p	MIMAT0000210	Tcerg1	56070	NM_001039474	1	9	4135	4127	0.0041
mmu-miR-181a-5p	MIMAT0000210	Tchhl1	71325	NM_027762	1	8	2007	2000	0.0011
mmu-miR-181a-5p	MIMAT0000210	Tecpr2	104859	NM_001081057	1	9	7770	7762	0.0128
mmu-miR-181a-5p	MIMAT0000210	Tex33	73376	NM_001163613	1	7	907	901	0.0042
mmu-miR-181a-5p	MIMAT0000210	Tex33	73376	NM_028522	1	7	1037	1031	0.0042
mmu-miR-181a-5p	MIMAT0000210	Tex33	73376	NM_001163612	1	7	1112	1106	0.0042
mmu-miR-181a-5p	MIMAT0000210	Tfcp2	21422	NM_033476	1	8	1690	1683	0.0243
mmu-miR-181a-5p	MIMAT0000210	Tff1	21784	NM_009362	1	8	478	471	0.0028
mmu-miR-181a-5p	MIMAT0000210	Tgfbi	21810	NM_009369	1	9	2174	2166	0.0022
mmu-miR-181a-5p	MIMAT0000210	Tgif1	21815	NM_001164074	1	7	1106	1100	0.0296
mmu-miR-181a-5p	MIMAT0000210	Tgif1	21815	NM_001164076	1	7	1172	1166	0.0296
mmu-miR-181a-5p	MIMAT0000210	Tgif1	21815	NM_009372	1	7	1360	1354	0.0296
mmu-miR-181a-5p	MIMAT0000210	Tgif1	21815	NM_001164077	1	7	1400	1394	0.0296
mmu-miR-181a-5p	MIMAT0000210	Tgif1	21815	NM_001164075	1	7	1446	1440	0.0296
mmu-miR-181a-5p	MIMAT0000210	Tgif2	228839	NM_173396	1	10	1339	1330	0.0018
mmu-miR-181a-5p	MIMAT0000210	Them4	75778	NM_029431	1	8	1666	1659	0.0144
mmu-miR-181a-5p	MIMAT0000210	Them5	66198	NM_025416	1	8	1242	1235	0.0052
mmu-miR-181a-5p	MIMAT0000210	Themis	210757	NM_178666	1	8	2591	2584	0.0272
mmu-miR-181a-5p	MIMAT0000210	Tifa	211550	NM_145133	1	8	1778	1771	0.0193
mmu-miR-181a-5p	MIMAT0000210	Timm10b	14356	NM_019502	1	7	927	921	0.0393
mmu-miR-181a-5p	MIMAT0000210	Timm17b	21855	NM_011591	1	8	835	828	0.0163
mmu-miR-181a-5p	MIMAT0000210	Timm21	67105	NM_025969	1	7	1045	1039	0.0213
mmu-miR-181a-5p	MIMAT0000210	Timp2	21858	NM_011594	1	8	2434	2427	0.0396
mmu-miR-181a-5p	MIMAT0000210	Tlr13	279572	NM_205820	1	8	3195	3188	0.013
mmu-miR-181a-5p	MIMAT0000210	Tlr4	21898	NM_021297	1	8	3576	3569	0.0199
mmu-miR-181a-5p	MIMAT0000210	Tmc5	74424	NM_001105252	1	7	3638	3632	0.0254
mmu-miR-181a-5p	MIMAT0000210	Tmc5	74424	NM_028930	1	7	2789	2783	0.0254
mmu-miR-181a-5p	MIMAT0000210	Tmed7	66676	NM_025698	1	8	2502	2495	0.0378
mmu-miR-181a-5p	MIMAT0000210	Tmem116	77462	NM_001161626	1	8	1066	1059	0.0035
mmu-miR-181a-5p	MIMAT0000210	Tmem116	77462	NM_029912	1	8	1104	1097	0.0035
mmu-miR-181a-5p	MIMAT0000210	Tmem116	77462	NM_001161627	1	8	1171	1164	0.0035
mmu-miR-181a-5p	MIMAT0000210	Tmem123	71929	NM_133739	1	9	2593	2585	0.0082
mmu-miR-181a-5p	MIMAT0000210	Tmem126b	68472	NM_026734	1	8	847	840	0.0027
mmu-miR-181a-5p	MIMAT0000210	Tmem141	51875	NM_001040130	1	7	718	712	0.028
mmu-miR-181a-5p	MIMAT0000210	Tmem141	51875	NM_001109993	1	7	980	974	0.028
mmu-miR-181a-5p	MIMAT0000210	Tmem144	70652	NM_027495	1	8	1872	1865	0.0138
mmu-miR-181a-5p	MIMAT0000210	Tmem151b	210573	NM_001013749	1	8	4197	4190	0.0431
mmu-miR-181a-5p	MIMAT0000210	Tmem178	68027	NM_026516	1	8	1465	1458	0.0113
mmu-miR-181a-5p	MIMAT0000210	Tmem181a	77106	NM_001033178	1	8	4129	4122	0.0432
mmu-miR-181a-5p	MIMAT0000210	Tmem185b	226351	NM_146103	1	8	2004	1997	0.0214
mmu-miR-181a-5p	MIMAT0000210	Tmem200a	77220	NM_029881	1	8	3510	3503	0.0257
mmu-miR-181a-5p	MIMAT0000210	Tmem242	70544	NM_027457	1	7	634	628	0.0304
mmu-miR-181a-5p	MIMAT0000210	Tmem62	96957	NM_175285	1	8	2310	2303	0.0109
mmu-miR-181a-5p	MIMAT0000210	Tnfrsf19	29820	NM_001164155	1	8	2182	2175	0.0392
mmu-miR-181a-5p	MIMAT0000210	Tnfrsf19	29820	NM_013869	1	8	2785	2778	0.0392
mmu-miR-181a-5p	MIMAT0000210	Tnfsf11	21943	NM_011613	1	8	2196	2189	0.0172
mmu-miR-181a-5p	MIMAT0000210	Tnfsf15	326623	NM_177371	1	10	5664	5655	0.0047
mmu-miR-181a-5p	MIMAT0000210	Tnip3	414084	NM_001001495	1	8	1903	1896	0.0438
mmu-miR-181a-5p	MIMAT0000210	Tox	252838	NM_145711	1	8	2266	2259	0.0157
mmu-miR-181a-5p	MIMAT0000210	Tpp1	12751	NM_009906	1	8	3341	3334	0.0269
mmu-miR-181a-5p	MIMAT0000210	Tra2a	101214	NM_198102	1	7	1478	1472	0.0483
mmu-miR-181a-5p	MIMAT0000210	Traf1	22029	NM_009421	1	8	1983	1976	0.0093
mmu-miR-181a-5p	MIMAT0000210	Trappc9	76510	NM_001164641	1	8	4160	4153	0.0243
mmu-miR-181a-5p	MIMAT0000210	Trim21	20821	NM_001082552	1	8	2260	2253	0.0181
mmu-miR-181a-5p	MIMAT0000210	Trim21	20821	NM_009277	1	8	2329	2322	0.0181
mmu-miR-181a-5p	MIMAT0000210	Trim30b	244183	NM_175648	1	9	1051	1043	0.0067
mmu-miR-181a-5p	MIMAT0000210	Trim34a	94094	NM_030684	1	7	2421	2415	0.048
mmu-miR-181a-5p	MIMAT0000210	Trim36	28105	NM_001170855	1	9	3722	3714	0.0081
mmu-miR-181a-5p	MIMAT0000210	Trim36	28105	NM_178872	1	9	3723	3715	0.0081
mmu-miR-181a-5p	MIMAT0000210	Trim52	212085	NM_198601	1	8	1896	1889	0.0251
mmu-miR-181a-5p	MIMAT0000210	Trim9	94090	NM_001110202	1	9	3651	3643	0.0071
mmu-miR-181a-5p	MIMAT0000210	Trim9	94090	NM_053167	1	9	3873	3865	0.0071
mmu-miR-181a-5p	MIMAT0000210	Trmt2b	215201	NM_001167994	1	8	3184	3177	0.0245
mmu-miR-181a-5p	MIMAT0000210	Trmt2b	215201	NM_172540	1	8	3108	3101	0.0245
mmu-miR-181a-5p	MIMAT0000210	Trp53inp2	68728	NM_178111	1	8	3866	3859	0.0455
mmu-miR-181a-5p	MIMAT0000210	Trpa1	277328	NM_177781	1	8	3917	3910	0.013
mmu-miR-181a-5p	MIMAT0000210	Trpd52l3	66745	NM_025741	1	9	2082	2074	0.0056
mmu-miR-181a-5p	MIMAT0000210	Trpv6	64177	NM_022413	1	8	2484	2477	0.0071
mmu-miR-181a-5p	MIMAT0000210	Trrap	100683	NM_001081362	1	7	12422	12416	0.0485
mmu-miR-181a-5p	MIMAT0000210	Tsn	22099	NM_011650	1	8	1035	1028	0.0343
mmu-miR-181a-5p	MIMAT0000210	Tspyl1	22110	NM_009433	1	10	2160	2151	0.0014
mmu-miR-181a-5p	MIMAT0000210	Ttc22	230576	NM_177667	1	7	1925	1919	0.0433
mmu-miR-181a-5p	MIMAT0000210	Ttc30a1	78802	NM_030188	1	7	2771	2765	0.0381
mmu-miR-181a-5p	MIMAT0000210	Ttk	22137	NM_009445	1	7	2861	2855	0.0195
mmu-miR-181a-5p	MIMAT0000210	Ttl	69737	NM_027192	1	9	4519	4511	0.0122
mmu-miR-181a-5p	MIMAT0000210	Twist1	22160	NM_011658	1	7	1252	1246	0.044
mmu-miR-181a-5p	MIMAT0000210	Ube2cbp	70348	NM_027394	1	8	1583	1576	0.0094
mmu-miR-181a-5p	MIMAT0000210	Ube2f	67921	NM_026454	1	7	1149	1143	0.0401
mmu-miR-181a-5p	MIMAT0000210	Ube2l3	22195	NM_009456	1	9	1673	1665	0.008
mmu-miR-181a-5p	MIMAT0000210	Ube2m	22192	NM_145578	1	7	1171	1165	0.0297
mmu-miR-181a-5p	MIMAT0000210	Ube2m	22192	NM_001243968	1	7	886	880	0.0297
mmu-miR-181a-5p	MIMAT0000210	Ube2m	22192	NM_001168469	1	7	1104	1098	0.0297
mmu-miR-181a-5p	MIMAT0000210	Ubl4	27643	NM_145405	1	8	1713	1706	0.0267
mmu-miR-181a-5p	MIMAT0000210	Uchl4	93841	NM_033607	1	7	910	904	0.0254
mmu-miR-181a-5p	MIMAT0000210	Uhrf1bp1l	75089	NM_029166	1	8	6368	6361	0.0274
mmu-miR-181a-5p	MIMAT0000210	Unc80	329178	NM_175510	1	10	12161	12152	0.0034
mmu-miR-181a-5p	MIMAT0000210	Urb1	207932	NM_029497	1	7	7249	7243	0.0285
mmu-miR-181a-5p	MIMAT0000210	Usp14	59025	NM_001038589	1	8	1635	1628	0.0372
mmu-miR-181a-5p	MIMAT0000210	Usp14	59025	NM_021522	1	8	1740	1733	0.0372
mmu-miR-181a-5p	MIMAT0000210	Usp33	170822	NM_133247	1	8	3924	3917	0.0191
mmu-miR-181a-5p	MIMAT0000210	Usp33	170822	NM_001076676	1	8	3888	3881	0.0191
mmu-miR-181a-5p	MIMAT0000210	Usp33	170822	NM_001252486	1	8	3900	3893	0.0191
mmu-miR-181a-5p	MIMAT0000210	Uty	22290	NM_009484	1	9	4562	4554	0.0053
mmu-miR-181a-5p	MIMAT0000210	Vcan	13003	NM_001134474	1	9	6246	6238	0.0073
mmu-miR-181a-5p	MIMAT0000210	Vcan	13003	NM_019389	1	9	8583	8575	0.0073
mmu-miR-181a-5p	MIMAT0000210	Vcan	13003	NM_001081249	1	9	11463	11455	0.0073
mmu-miR-181a-5p	MIMAT0000210	Vcan	13003	NM_001134475	1	9	3366	3358	0.0073
mmu-miR-181a-5p	MIMAT0000210	Vdr	22337	NM_009504	1	8	2969	2962	0.0439
mmu-miR-181a-5p	MIMAT0000210	Vhl	22346	NM_009507	1	8	1107	1100	0.031
mmu-miR-181a-5p	MIMAT0000210	Vmn1r195	171257	NM_134223	1	7	1078	1072	0.0056
mmu-miR-181a-5p	MIMAT0000210	Vsig10	231668	NM_001033311	1	8	3343	3336	0.033
mmu-miR-181a-5p	MIMAT0000210	Vsx1	114889	NM_054068	1	8	2208	2201	0.0346
mmu-miR-181a-5p	MIMAT0000210	Vwa9	69882	NM_001077631	1	8	2121	2114	0.0132
mmu-miR-181a-5p	MIMAT0000210	Vwa9	69882	NM_175153	1	8	2335	2328	0.0132
mmu-miR-181a-5p	MIMAT0000210	Wapal	218914	NM_001004436	1	9	4481	4473	0.002
mmu-miR-181a-5p	MIMAT0000210	Wasl	73178	NM_028459	1	8	2335	2328	0.0373
mmu-miR-181a-5p	MIMAT0000210	Wdr7	104082	NM_001014981	1	9	5331	5323	0.0091
mmu-miR-181a-5p	MIMAT0000210	Wdr88	384605	XM_003946229	1	7	1897	1891	0.0144
mmu-miR-181a-5p	MIMAT0000210	Wdr88	384605	XM_001480144	1	7	1999	1993	0.0144
mmu-miR-181a-5p	MIMAT0000210	Wtap	60532	NM_001113533	1	8	1926	1919	0.0102
mmu-miR-181a-5p	MIMAT0000210	Xirp2	241431	NM_001024618	1	7	11647	11641	0.0214
mmu-miR-181a-5p	MIMAT0000210	Xlr3c	22446	NM_011727	1	7	1423	1417	0.0495
mmu-miR-181a-5p	MIMAT0000210	Xlr4a	434794	NM_001081642	1	7	1030	1024	0.0184
mmu-miR-181a-5p	MIMAT0000210	Xlr4b	27083	NM_021365	1	7	1125	1119	0.0194
mmu-miR-181a-5p	MIMAT0000210	Xlr4c	72891	NM_183094	1	7	1060	1054	0.0199
mmu-miR-181a-5p	MIMAT0000210	Xlr5a	574438	NM_001045539	1	8	1135	1128	0.0122
mmu-miR-181a-5p	MIMAT0000210	Ybx3	56449	NM_139117	1	7	1440	1434	0.0348
mmu-miR-181a-5p	MIMAT0000210	Ybx3	56449	NM_011733	1	7	1233	1227	0.0348
mmu-miR-181a-5p	MIMAT0000210	Yipf6	77929	NM_207633	1	9	3690	3682	0.0153
mmu-miR-181a-5p	MIMAT0000210	Ythdc1	231386	NM_177680	1	7	2945	2939	0.0447
mmu-miR-181a-5p	MIMAT0000210	Ythdf2	213541	NM_145393	1	8	2835	2828	0.0302
mmu-miR-181a-5p	MIMAT0000210	Ythdf3	229096	NM_172677	1	8	2605	2598	0.046
mmu-miR-181a-5p	MIMAT0000210	Ythdf3	229096	NM_001145919	1	8	2572	2565	0.046
mmu-miR-181a-5p	MIMAT0000210	Ywhag	22628	NM_018871	1	10	1972	1963	0.0025
mmu-miR-181a-5p	MIMAT0000210	Zak	65964	NM_001164791	1	9	5359	5351	0.0195
mmu-miR-181a-5p	MIMAT0000210	Zbtb2	381990	NM_001033466	1	8	1826	1819	0.0212
mmu-miR-181a-5p	MIMAT0000210	Zbtb42	382639	NM_001100460	1	8	1533	1526	0.0314
mmu-miR-181a-5p	MIMAT0000210	Zbtb43	71834	NM_001025594	1	9	4911	4903	0.0129
mmu-miR-181a-5p	MIMAT0000210	Zbtb43	71834	NM_027947	1	9	5003	4995	0.0129
mmu-miR-181a-5p	MIMAT0000210	Zbtbd6	432879	NM_001034882	1	8	2710	2703	0.0196
mmu-miR-181a-5p	MIMAT0000210	Zc3h11a	70579	NM_144530	1	8	4150	4143	0.0252
mmu-miR-181a-5p	MIMAT0000210	Zc3h6	78751	NM_178404	1	9	4476	4468	0.0037
mmu-miR-181a-5p	MIMAT0000210	Zcchc2	227449	NM_001122676	1	8	4636	4629	0.0291
mmu-miR-181a-5p	MIMAT0000210	Zcchc2	227449	NM_001122675	1	8	5498	5491	0.0422
mmu-miR-181a-5p	MIMAT0000210	Zcchc3	67917	NM_175126	1	9	2700	2692	0.0062
mmu-miR-181a-5p	MIMAT0000210	Zdhhc17	320150	NM_172554	1	8	4376	4369	0.0393
mmu-miR-181a-5p	MIMAT0000210	Zdhhc21	68268	NM_026647	1	9	4905	4897	0.0285
mmu-miR-181a-5p	MIMAT0000210	Zfand5	22682	NM_009551	1	10	1962	1953	0.006
mmu-miR-181a-5p	MIMAT0000210	Zfc3h1	216345	NM_001033261	1	9	6774	6766	0.0028
mmu-miR-181a-5p	MIMAT0000210	Zfhx4	80892	NM_030708	1	8	13226	13219	0.0405
mmu-miR-181a-5p	MIMAT0000210	Zfp101	22643	NM_009542	1	7	2547	2541	0.0455
mmu-miR-181a-5p	MIMAT0000210	Zfp180	210135	NM_001045486	1	8	2645	2638	0.0165
mmu-miR-181a-5p	MIMAT0000210	Zfp280d	235469	NM_146224	1	9	4272	4264	0.0049
mmu-miR-181a-5p	MIMAT0000210	Zfp512	269639	NM_172993	1	8	2662	2655	0.0229
mmu-miR-181a-5p	MIMAT0000210	Zfp598	213753	NM_183149	1	7	3146	3140	0.0354
mmu-miR-181a-5p	MIMAT0000210	Zfp605	675812	NM_001163996	1	7	2530	2524	0.0414
mmu-miR-181a-5p	MIMAT0000210	Zfp616	327963	NM_001177570	1	8	3982	3975	0.0216
mmu-miR-181a-5p	MIMAT0000210	Zfp619	70227	NM_001004139	1	8	5490	5483	0.0359
mmu-miR-181a-5p	MIMAT0000210	Zfp647	239546	NM_172817	1	7	2129	2123	0.0301
mmu-miR-181a-5p	MIMAT0000210	Zfp647	239546	NM_001168276	1	7	2214	2208	0.0301
mmu-miR-181a-5p	MIMAT0000210	Zfp658	210104	NM_001008549	1	7	3187	3181	0.0298
mmu-miR-181a-5p	MIMAT0000210	Zfp689	71131	NM_175163	1	9	2617	2609	0.007
mmu-miR-181a-5p	MIMAT0000210	Zfp697	242109	NM_172863	1	8	2942	2935	0.0495
mmu-miR-181a-5p	MIMAT0000210	Zfp711	245595	NM_177747	1	8	3611	3604	0.0227
mmu-miR-181a-5p	MIMAT0000210	Zfp770	228491	NM_175466	1	8	3928	3921	0.0304
mmu-miR-181a-5p	MIMAT0000210	Zfp82	330502	NM_001252519	1	8	1937	1930	0.002
mmu-miR-181a-5p	MIMAT0000210	Zfp82	330502	NM_177889	1	8	2027	2020	0.002
mmu-miR-181a-5p	MIMAT0000210	Zfp846	244721	NM_172919	1	7	2411	2405	0.0431
mmu-miR-181a-5p	MIMAT0000210	Zfp870	240066	NM_207245	1	9	2236	2228	0.0132
mmu-miR-181a-5p	MIMAT0000210	Zfp871	208292	NM_172458	1	9	3158	3150	0.0332
mmu-miR-181a-5p	MIMAT0000210	Zfp874a	238692	NM_177712	1	8	2981	2974	0.0271
mmu-miR-181a-5p	MIMAT0000210	Zfp874b	408067	NM_001076791	1	8	3507	3500	0.0351
mmu-miR-181a-5p	MIMAT0000210	Zfp931	353208	NM_001162922	1	9	1383	1375	0.0031
mmu-miR-181a-5p	MIMAT0000210	Zfp936	668620	NM_001034893	1	8	2867	2860	0.0245
mmu-miR-181a-5p	MIMAT0000210	Zfp945	240041	NM_001110254	1	9	5429	5421	0.0148
mmu-miR-181a-5p	MIMAT0000210	Zfp945	240041	NM_177358	1	9	5550	5542	0.0148
mmu-miR-181a-5p	MIMAT0000210	Zik1	22775	NM_009577	1	8	2231	2224	0.0382
mmu-miR-181a-5p	MIMAT0000210	Zkscan17	268417	NM_001130529	1	9	3565	3557	0.0059
mmu-miR-181a-5p	MIMAT0000210	Zkscan17	268417	NM_172941	1	9	3612	3604	0.0059
mmu-miR-181a-5p	MIMAT0000210	Zmat5	67178	NM_026015	1	7	771	765	0.0124
mmu-miR-181a-5p	MIMAT0000210	Zpbp	53604	NM_001185153	1	9	1775	1767	0.0097
mmu-miR-181a-5p	MIMAT0000210	Zpbp	53604	NM_015785	1	9	1946	1938	0.0097
mmu-miR-181a-5p	MIMAT0000210	Zscan4c	245109	NM_001013765	1	7	1799	1793	0.0331
mmu-miR-181a-5p	MIMAT0000210	Zscan4d	545913	NM_001100186	1	7	1788	1782	0.0168
mmu-miR-181a-5p	MIMAT0000210	Zscan4f	665902	NM_001110316	1	7	1774	1768	0.0078
mmu-miR-181a-5p	MIMAT0000210	Zxdb	668166	NM_001081473	1	10	4595	4586	0.0028
mmu-miR-181a-5p	MIMAT0000210	Zyg11b	414872	NM_001033634	1	10	3172	3163	0.0078
miRNA	MIMATid	Gene	EntrezID	RefseqID	Start position of miRNA seed	Seed length	Seed Start	Seed End	Pvalue
mmu-miR-451a	MIMAT0001632	1810030O07Rik	69155	NM_175141	1	8	2265	2258	0.0242
mmu-miR-451a	MIMAT0001632	2310042E22Rik	66561	NM_025634	1	7	1188	1182	0.0166
mmu-miR-451a	MIMAT0001632	4933402D24Rik	74426	NM_001256158	1	9	1705	1697	0.0045
mmu-miR-451a	MIMAT0001632	A630023A22Rik	105518	NM_001251843	1	7	1183	1177	0.0254
mmu-miR-451a	MIMAT0001632	Aacs	78894	NM_030210	1	8	2770	2763	0.0159
mmu-miR-451a	MIMAT0001632	Abhd17b	226016	NM_146096	1	8	1611	1604	0.0199
mmu-miR-451a	MIMAT0001632	Agrp	11604	NM_007427	1	7	662	656	0.0037
mmu-miR-451a	MIMAT0001632	Agtr1a	11607	NM_177322	1	8	1713	1706	0.0126
mmu-miR-451a	MIMAT0001632	Aktip	14339	NM_010241	1	8	1692	1685	0.0162
mmu-miR-451a	MIMAT0001632	Amacr	17117	NM_008537	1	8	2385	2378	0.0208
mmu-miR-451a	MIMAT0001632	Anxa13	69787	NM_027211	1	8	1393	1386	0.0062
mmu-miR-451a	MIMAT0001632	Ash1l	192195	NM_138679	1	8	9696	9689	0.0347
mmu-miR-451a	MIMAT0001632	Asph	65973	NM_001177856	1	8	2585	2578	0.0312
mmu-miR-451a	MIMAT0001632	Atp11c	320940	NM_001001798	1	9	4361	4353	0.0094
mmu-miR-451a	MIMAT0001632	Atp11c	320940	NM_001037863	1	9	4466	4458	0.0096
mmu-miR-451a	MIMAT0001632	Bcl6b	12029	NM_007528	1	8	2387	2380	0.0286
mmu-miR-451a	MIMAT0001632	Bex4	406217	NM_212457	1	9	666	658	0.0009
mmu-miR-451a	MIMAT0001632	Bex6	328660	NM_001033539	1	9	861	853	0.0009
mmu-miR-451a	MIMAT0001632	Btbd3	228662	NM_145534	1	10	3045	3036	0.0028
mmu-miR-451a	MIMAT0001632	Btbd3	228662	NM_001025431	1	10	2743	2734	0.0028
mmu-miR-451a	MIMAT0001632	Cab39	12283	NM_133781	1	8	1562	1555	0.0353
mmu-miR-451a	MIMAT0001632	Casq1	12372	NM_009813	1	9	1707	1699	0.0017
mmu-miR-451a	MIMAT0001632	Cd84	12523	NM_013489	1	8	1233	1226	0.0318
mmu-miR-451a	MIMAT0001632	Cdkn1c	12577	NM_009876	1	7	1355	1349	0.0417
mmu-miR-451a	MIMAT0001632	Cdkn1c	12577	NM_001161624	1	7	1393	1387	0.0417
mmu-miR-451a	MIMAT0001632	Chi3l3	12655	NM_009892	1	8	1302	1295	0.005
mmu-miR-451a	MIMAT0001632	Chi3l4	104183	NM_145126	1	8	1274	1267	0.0044
mmu-miR-451a	MIMAT0001632	Cldn18	56492	NM_001194923	1	8	1655	1648	0.0316
mmu-miR-451a	MIMAT0001632	Cldn18	56492	NM_019815	1	8	1706	1699	0.029
mmu-miR-451a	MIMAT0001632	Cldn18	56492	NM_001194922	1	8	1718	1711	0.0316
mmu-miR-451a	MIMAT0001632	Cldn18	56492	NM_001194921	1	8	1643	1636	0.029
mmu-miR-451a	MIMAT0001632	Coq4	227683	NM_178693	1	9	1524	1516	0.0044
mmu-miR-451a	MIMAT0001632	Cse1l	110750	NM_023565	1	7	3277	3271	0.0357
mmu-miR-451a	MIMAT0001632	Dach1	13134	NM_001038610	1	8	3234	3227	0.0412
mmu-miR-451a	MIMAT0001632	Dach1	13134	NM_007826	1	8	3390	3383	0.0412
mmu-miR-451a	MIMAT0001632	Dcaf17	75763	NM_001165982	1	9	1573	1565	0.0054
mmu-miR-451a	MIMAT0001632	Ddah1	69219	NM_026993	1	8	2940	2933	0.0406
mmu-miR-451a	MIMAT0001632	Duxbl2	100039227	NM_001177538	1	7	2028	2022	0.046
mmu-miR-451a	MIMAT0001632	Duxbl3	100039293	NM_001177539	1	7	2028	2022	0.046
mmu-miR-451a	MIMAT0001632	Efhd1	98363	NM_028889	1	8	1010	1003	0.0151
mmu-miR-451a	MIMAT0001632	Egf	13645	NM_010113	1	7	4296	4290	0.0445
mmu-miR-451a	MIMAT0001632	Eid2	386655	NM_198425	1	7	1045	1039	0.0309
mmu-miR-451a	MIMAT0001632	En1	13798	NM_010133	1	8	1940	1933	0.0122
mmu-miR-451a	MIMAT0001632	Fbxw17	109082	NM_175401	1	7	1650	1644	0.0247
mmu-miR-451a	MIMAT0001632	Fgf17	14171	NM_008004	1	7	1569	1563	0.0315
mmu-miR-451a	MIMAT0001632	Fli1	14247	NM_008026	1	8	1807	1800	0.0236
mmu-miR-451a	MIMAT0001632	Foxd4	14237	NM_008022	1	7	2065	2059	0.0321
mmu-miR-451a	MIMAT0001632	Gars	353172	NM_180678	1	7	2320	2314	0.0097
mmu-miR-451a	MIMAT0001632	Gcnt3	72077	NM_028087	1	8	2638	2631	0.0371
mmu-miR-451a	MIMAT0001632	Gdf6	242316	NM_013526	1	8	2925	2918	0.031
mmu-miR-451a	MIMAT0001632	Gfra2	14586	NM_008115	1	8	2727	2720	0.0203
mmu-miR-451a	MIMAT0001632	Gm12689	100137011	XM_003945380	1	7	644	638	0.0258
mmu-miR-451a	MIMAT0001632	Gm12689	100137011	XM_003946135	1	7	644	638	0.0258
mmu-miR-451a	MIMAT0001632	Gm266	212539	NM_001033248	1	7	997	991	0.0345
mmu-miR-451a	MIMAT0001632	Gm6557	625123	XM_889664	1	7	1061	1055	0.0166
mmu-miR-451a	MIMAT0001632	Gm6557	625123	XM_993981	1	7	1061	1055	0.0166
mmu-miR-451a	MIMAT0001632	Gm694	277744	NM_001033374	1	7	831	825	0.0226
mmu-miR-451a	MIMAT0001632	Gopc	94221	NM_053187	1	8	2177	2170	0.0404
mmu-miR-451a	MIMAT0001632	Gopc	94221	NM_001199272	1	8	2201	2194	0.0404
mmu-miR-451a	MIMAT0001632	Gorasp2	70231	NM_027352	1	7	2045	2039	0.0443
mmu-miR-451a	MIMAT0001632	Gpx7	67305	NM_024198	1	7	967	961	0.037
mmu-miR-451a	MIMAT0001632	Gria2	14800	NM_001039195	1	9	2782	2774	0.003
mmu-miR-451a	MIMAT0001632	H2afy	26914	NM_001159514	1	9	1770	1762	0.0024
mmu-miR-451a	MIMAT0001632	H2afy	26914	NM_001159513	1	9	1776	1768	0.0024
mmu-miR-451a	MIMAT0001632	H2afy	26914	NM_012015	1	9	1779	1771	0.0024
mmu-miR-451a	MIMAT0001632	H2afy	26914	NM_001159515	1	9	1767	1759	0.0024
mmu-miR-451a	MIMAT0001632	Hist1h2be	319179	NM_001177653	1	9	1986	1978	0.0073
mmu-miR-451a	MIMAT0001632	Hist1h2be	319179	NM_178194	1	9	2012	2004	0.0073
mmu-miR-451a	MIMAT0001632	Hlx	15284	NM_008250	1	7	2143	2137	0.0234
mmu-miR-451a	MIMAT0001632	Hp1bp3	15441	NM_001122896	1	8	2615	2608	0.0216
mmu-miR-451a	MIMAT0001632	Hp1bp3	15441	NM_010470	1	8	2813	2806	0.0216
mmu-miR-451a	MIMAT0001632	Hp1bp3	15441	NM_001122897	1	8	2863	2856	0.0216
mmu-miR-451a	MIMAT0001632	Igf2bp3	140488	NM_023670	1	8	3591	3584	0.0322
mmu-miR-451a	MIMAT0001632	Il20rb	213208	NM_001033543	1	10	2142	2133	0.0013
mmu-miR-451a	MIMAT0001632	Irf1	16362	NM_001159393	1	8	1988	1981	0.0143
mmu-miR-451a	MIMAT0001632	Itpk1	217837	NM_172584	1	8	1768	1761	0.0233
mmu-miR-451a	MIMAT0001632	Jrk	16469	NM_008415	1	8	2885	2878	0.0498
mmu-miR-451a	MIMAT0001632	Kifc5b	16580	NM_053173	1	9	2582	2574	0.0016
mmu-miR-451a	MIMAT0001632	Klf14	619665	NM_001135093	1	8	1511	1504	0.0256
mmu-miR-451a	MIMAT0001632	Krt26	320864	NM_001033397	1	9	2229	2221	0.0044
mmu-miR-451a	MIMAT0001632	Lamp5	76161	NM_029530	1	7	1667	1661	0.0439
mmu-miR-451a	MIMAT0001632	Ldoc1l	223732	NM_177630	1	8	4162	4155	0.046
mmu-miR-451a	MIMAT0001632	LOC100503966	100503966	XM_003689388	1	7	1355	1349	0.035
mmu-miR-451a	MIMAT0001632	LOC100503966	100503966	XM_003084645	1	7	1356	1350	0.0351
mmu-miR-451a	MIMAT0001632	LOC101056168	101056168	XM_003945750	1	9	1089	1081	0.0023
mmu-miR-451a	MIMAT0001632	LOC101056168	101056168	XM_003946129	1	9	1840	1832	0.0023
mmu-miR-451a	MIMAT0001632	Lrfn3	233067	NM_175478	1	7	2821	2815	0.0075
mmu-miR-451a	MIMAT0001632	Marcksl1	17357	NM_010807	1	7	1069	1063	0.0453
mmu-miR-451a	MIMAT0001632	Mdp1	67881	NM_023397	1	8	1056	1049	0.0167
mmu-miR-451a	MIMAT0001632	Me1	17436	NM_008615	1	9	3118	3110	0.0052
mmu-miR-451a	MIMAT0001632	Me1	17436	NM_001198933	1	9	3196	3188	0.0052
mmu-miR-451a	MIMAT0001632	Mex3c	240396	NM_001039214	1	9	3580	3572	0.0068
mmu-miR-451a	MIMAT0001632	Mrgprd	211578	NM_203490	1	8	1715	1708	0.026
mmu-miR-451a	MIMAT0001632	Nabp1	109019	NM_028696	1	8	1708	1701	0.0265
mmu-miR-451a	MIMAT0001632	Nek9	217718	NM_145138	1	8	5168	5161	0.0346
mmu-miR-451a	MIMAT0001632	Nrxn3	18191	NM_001252074	1	9	3828	3820	0.0096
mmu-miR-451a	MIMAT0001632	Nrxn3	18191	NM_172544	1	9	5200	5192	0.0096
mmu-miR-451a	MIMAT0001632	Nrxn3	18191	NM_001198587	1	9	6604	6596	0.0096
mmu-miR-451a	MIMAT0001632	Nsa2	59050	NM_021552	1	9	1148	1140	0.0066
mmu-miR-451a	MIMAT0001632	Nsun4	72181	NM_028142	1	8	3315	3308	0.0342
mmu-miR-451a	MIMAT0001632	Nudt19	110959	NM_033080	1	8	1403	1396	0.0111
mmu-miR-451a	MIMAT0001632	Nudt2	66401	NM_025539	1	7	775	769	0.0268
mmu-miR-451a	MIMAT0001632	Nup160	59015	NM_021512	1	7	5051	5045	0.049
mmu-miR-451a	MIMAT0001632	Odf3	69287	NM_027019	1	7	923	917	0.0078
mmu-miR-451a	MIMAT0001632	Ogdh	18293	NM_001252282	1	9	5533	5525	0.013
mmu-miR-451a	MIMAT0001632	Ogdh	18293	NM_001252288	1	9	5536	5528	0.013
mmu-miR-451a	MIMAT0001632	Ogdh	18293	NM_001252287	1	9	5564	5556	0.013
mmu-miR-451a	MIMAT0001632	Ogdh	18293	NM_010956	1	9	5488	5480	0.013
mmu-miR-451a	MIMAT0001632	Ogdh	18293	NM_001252283	1	9	5521	5513	0.013
mmu-miR-451a	MIMAT0001632	Omt2a	18379	NM_001164523	1	9	551	543	0.0011
mmu-miR-451a	MIMAT0001632	Omt2a	18379	NM_001111286	1	9	1172	1164	0.0011
mmu-miR-451a	MIMAT0001632	Omt2b	382088	NM_205822	1	9	684	676	0.001
mmu-miR-451a	MIMAT0001632	Ooep	67968	NM_026480	1	7	755	749	0.039
mmu-miR-451a	MIMAT0001632	Orc5	26429	NM_011959	1	7	1565	1559	0.0408
mmu-miR-451a	MIMAT0001632	Parg	26430	NM_011960	1	10	3758	3749	0.0012
mmu-miR-451a	MIMAT0001632	Parva	57342	NM_020606	1	9	3618	3610	0.0117
mmu-miR-451a	MIMAT0001632	Pecam1	18613	NM_001032378	1	8	3082	3075	0.014
mmu-miR-451a	MIMAT0001632	Pecam1	18613	NM_008816	1	8	3139	3132	0.014
mmu-miR-451a	MIMAT0001632	Pole	18973	NM_011132	1	7	7120	7114	0.0149
mmu-miR-451a	MIMAT0001632	Ppfia2	327814	NM_177373	1	10	4197	4188	0.0023
mmu-miR-451a	MIMAT0001632	Ppfia2	327814	NM_001205341	1	10	4200	4191	0.0023
mmu-miR-451a	MIMAT0001632	Prpsap1	67763	NM_026364	1	7	1577	1571	0.0348
mmu-miR-451a	MIMAT0001632	Psd2	74002	NM_028707	1	8	4057	4050	0.0284
mmu-miR-451a	MIMAT0001632	Psen1	19164	NM_008943	1	8	2103	2096	0.0171
mmu-miR-451a	MIMAT0001632	Rasgrp1	19419	NM_011246	1	8	2709	2702	0.0389
mmu-miR-451a	MIMAT0001632	Raver1	71766	NM_027911	1	8	3439	3432	0.0182
mmu-miR-451a	MIMAT0001632	Rer1	67830	NM_026395	1	8	729	722	0.0125
mmu-miR-451a	MIMAT0001632	Rtkn2	170799	NM_001081346	1	8	3146	3139	0.0293
mmu-miR-451a	MIMAT0001632	Rufy2	70432	NM_027425	1	9	2322	2314	0.0264
mmu-miR-451a	MIMAT0001632	Sae1	56459	NM_019748	1	7	1328	1322	0.0467
mmu-miR-451a	MIMAT0001632	Samd4b	233033	NM_175021	1	9	2930	2922	0.0079
mmu-miR-451a	MIMAT0001632	Sar1b	66397	NM_025535	1	7	1169	1163	0.0306
mmu-miR-451a	MIMAT0001632	Sec61a1	53421	NM_016906	1	8	2340	2333	0.0226
mmu-miR-451a	MIMAT0001632	Sfmbt2	353282	NM_001198809	1	9	1850	1842	0.0041
mmu-miR-451a	MIMAT0001632	Sgcz	244431	NM_145841	1	7	1743	1737	0.0423
mmu-miR-451a	MIMAT0001632	Six1	20471	NM_009189	1	8	1561	1554	0.0257
mmu-miR-451a	MIMAT0001632	Slc16a2	20502	NM_009197	1	9	2817	2809	0.0089
mmu-miR-451a	MIMAT0001632	Slc35e1	270066	NM_177766	1	9	3413	3405	0.0218
mmu-miR-451a	MIMAT0001632	Slc44a5	242259	NM_001081263	1	8	3668	3661	0.0247
mmu-miR-451a	MIMAT0001632	Sptssa	104725	NM_134054	1	8	1276	1269	0.016
mmu-miR-451a	MIMAT0001632	Stk39	53416	NM_016866	1	8	2420	2413	0.0225
mmu-miR-451a	MIMAT0001632	Syngr2	20973	NM_009304	1	8	1514	1507	0.0123
mmu-miR-451a	MIMAT0001632	Szrd1	213491	NM_001025608	1	8	2490	2483	0.0416
mmu-miR-451a	MIMAT0001632	Tacstd2	56753	NM_020047	1	8	1389	1382	0.0105
mmu-miR-451a	MIMAT0001632	Tbc1d30	74694	NM_029057	1	8	3446	3439	0.0451
mmu-miR-451a	MIMAT0001632	Tbcc	72726	NM_178385	1	7	1402	1396	0.0446
mmu-miR-451a	MIMAT0001632	Tbx1	21380	NM_011532	1	8	1765	1758	0.0043
mmu-miR-451a	MIMAT0001632	Tbx19	83993	NM_032005	1	8	1711	1704	0.0168
mmu-miR-451a	MIMAT0001632	Tctex1d4	242646	NM_175030	1	8	923	916	0.0014
mmu-miR-451a	MIMAT0001632	Tlr4	21898	NM_021297	1	8	2895	2888	0.0199
mmu-miR-451a	MIMAT0001632	Tmem150c	231503	NM_182841	1	8	2927	2920	0.03
mmu-miR-451a	MIMAT0001632	Tmem181a	77106	NM_001033178	1	11	3555	3545	0.0007
mmu-miR-451a	MIMAT0001632	Tmem231	234740	NM_001033321	1	8	1111	1104	0.0288
mmu-miR-451a	MIMAT0001632	Tmem261	66928	NM_025849	1	7	547	541	0.024
mmu-miR-451a	MIMAT0001632	Tmem52b	330428	NM_001081186	1	8	2659	2652	0.0276
mmu-miR-451a	MIMAT0001632	Tnfsf11	21943	NM_011613	1	8	1311	1304	0.0172
mmu-miR-451a	MIMAT0001632	Trim66	330627	NM_001170913	1	9	4850	4842	0.019
mmu-miR-451a	MIMAT0001632	Trim66	330627	NM_181853	1	9	4724	4716	0.0188
mmu-miR-451a	MIMAT0001632	Trim66	330627	NM_001170912	1	9	4787	4779	0.0188
mmu-miR-451a	MIMAT0001632	Tsen15	66637	NM_025677	1	8	1112	1105	0.0082
mmu-miR-451a	MIMAT0001632	Tsen2	381802	NM_199033	1	7	1625	1619	0.0226
mmu-miR-451a	MIMAT0001632	Tube1	71924	NM_028006	1	8	2064	2057	0.0217
mmu-miR-451a	MIMAT0001632	Vcp	269523	NM_009503	1	7	3012	3006	0.0339
mmu-miR-451a	MIMAT0001632	Wdr60	217935	NM_146039	1	7	3597	3591	0.0339
mmu-miR-451a	MIMAT0001632	Wnt7b	22422	NM_009528	1	8	1757	1750	0.0296
mmu-miR-451a	MIMAT0001632	Wnt7b	22422	NM_001163633	1	8	1794	1787	0.0296
mmu-miR-451a	MIMAT0001632	Wnt7b	22422	NM_001163634	1	8	1878	1871	0.0296
mmu-miR-451a	MIMAT0001632	Ybx1	22608	NM_011732	1	9	1402	1394	0.0041
mmu-miR-451a	MIMAT0001632	Zfand3	21769	NM_148926	1	8	1960	1953	0.0285
mmu-miR-451a	MIMAT0001632	Zfp644	52397	NM_026856	1	8	4761	4754	0.0227
mmu-miR-451a	MIMAT0001632	Zzz3	108946	NM_198416	1	9	3619	3611	0.0167
mmu-miR-451a	MIMAT0001632	Zzz3	108946	NM_001080755	1	9	3681	3673	0.0167
